# Supplementary material for: 4-(Aryl)-Benzo[4,5]imidazo[1,2-a]pyrimidine-3-Carbonitrile-Based Fluorophores: Povarov Reaction-Based Synthesis, Photophysical Studies, and DFT Calculations
Source: MDPI journal article supplement (doi:10.3390/molecules27228029), 2022-11-19
Supplement: s1 [file s1]

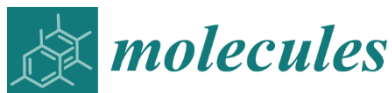

# 4-(Aryl)-Benzo[4,5]imidazo[1,2-*a*]pyrimidine-3-Carbonitrile-based Fluorophores: Povarov Reaction-based Synthesis, Photophysical Studies, and DFT Calculations

Victor V. Fedotov <sup>1,\*</sup>, Maria I. Valieva <sup>1</sup>, Olga S. Taniya <sup>1,\*</sup>, Semen V. Aminov <sup>1</sup>, Mikhail A. Kharitonov <sup>1</sup>, Alexander S. Novikov <sup>2</sup>, Dmitry S. Kopchuk <sup>1</sup>, Pavel A. Slepukhin <sup>1</sup>, Grigory V. Zyryanov <sup>1</sup>, Evgeny N. Ulomsky <sup>1</sup>, Vladimir L. Rusinov <sup>1</sup>, Valery N. Charushin <sup>1</sup>

<sup>1</sup> Chemical Engineering Institute, Ural Federal University, 19 Mira St., Yekaterinburg 620002, Russia

<sup>2</sup> Institute of Chemistry, Saint Petersburg State University, 7/9 Universitetskaya Nab., Saint Petersburg 199034, Russia

\* Correspondence: viktor.fedotov@urfu.ru

## ELECTRONIC SUPPLEMENTARY INFORMATION (ESI)

## Table of contents

|                                                                         |    |
|-------------------------------------------------------------------------|----|
| 1. Fluorescence lifetime of probes <b>6a-f</b> .....                    | 3  |
| 2. Absorption/fluorescence studies in solution and solvent effect ..... | 3  |
| 3. Preparation of PVA films.....                                        | 5  |
| 4. Aggregation study .....                                              | 5  |
| 5. Mechanochromic properties.....                                       | 6  |
| 6. Spectra of new compounds.....                                        | 7  |
| 7. Crystallography.....                                                 | 33 |

## 1. Fluorescence lifetime of probes 6a-f

**Table S1** Fluorescence lifetime of probes **6a-f** ( $C = 2 \times 10^{-6}$  M) in THF

| Entry | Compound  | $\tau_1$ , ns <sup>a</sup> | $\alpha_1$ <sup>b</sup> | $\tau_2$ , ns <sup>a</sup> | $\alpha_2$ <sup>b</sup> | $\tau$ , ns <sup>a</sup> | $\chi^2$ <sup>d</sup> |
|-------|-----------|----------------------------|-------------------------|----------------------------|-------------------------|--------------------------|-----------------------|
| 1     | <b>6a</b> | 5.920708                   | 10.29                   | 2.024593                   | 89.71                   | <b>2.43</b>              | 1.200343              |
| 2     | <b>6b</b> | 3.496655                   | 10.04                   | 5.310113                   | 89.96                   | <b>5.12</b>              | 0.9998662             |
| 3     | <b>6c</b> | 9.415322                   | 90.64                   | 2.668804                   | 9.36                    | <b>8.78</b>              | 1.140033              |
| 4     | <b>6d</b> | 1.233372                   | 65.27                   | 2.271551                   | 34.73                   | <b>1.59</b>              | 1.227632              |
| 5     | <b>6e</b> | 7.656714                   | 32.16                   | 5.572208                   | 67.84                   | <b>6.24</b>              | 1.102092              |
| 6     | <b>6f</b> | 2.025282                   | 73.12                   | 3.202319                   | 26.88                   | <b>2.34</b>              | 1.130712              |

<sup>a</sup> Decay time, <sup>b</sup> Fractional contribution, <sup>c</sup> Weighted average decay time  $\tau_{av} = \sum (\tau_i \times \alpha_i)$ , <sup>d</sup> Quality of fitting

## 2. Absorption/fluorescence studies in solution and solvent effect

**Table S2** Orientation polarizability for solvents ( $\Delta f$ ), absorption and fluorescence emission maxima ( $\lambda_{abs}$ ,  $\lambda_{em}$ , nm) and Stokes shift (nm,  $cm^{-1}$ ) of **6a** in different solvents

| Solvent     | $\Delta f$ | $\lambda_{abs}$ , nm | $\lambda_{em}$ , nm | Stokes shift, nm | Stokes shift, $cm^{-1}$ |
|-------------|------------|----------------------|---------------------|------------------|-------------------------|
| Cyclohexane | 0.001      | 402                  | 559                 | 157              | 6986                    |
| Toluene     | 0.013      | 416                  | 544                 | 128              | 5656                    |
| THF         | 0.209      | 413                  | 554                 | 141              | 6162                    |
| DCM         | 0.218      | 424                  | 547                 | 123              | 5303                    |
| DMSO        | 0.276      | 416                  | -                   | -                | -                       |
| MeCN        | 0.304      | 418                  | -                   | -                | -                       |

**Table S3** Orientation polarizability for solvents ( $\Delta f$ ), absorption and fluorescence emission maxima ( $\lambda_{abs}$ ,  $\lambda_{em}$ , nm) and Stokes shift (nm,  $cm^{-1}$ ) of **6b** in different solvents

| Solvent     | $\Delta f$ | $\lambda_{abs}$ , nm | $\lambda_{em}$ , nm | Stokes shift, nm | Stokes shift, $cm^{-1}$ |
|-------------|------------|----------------------|---------------------|------------------|-------------------------|
| Cyclohexane | 0.001      | 378                  | 532                 | 154              | 7658                    |
| Toluene     | 0.013      | 382                  | 541                 | 159              | 7693                    |
| THF         | 0.209      | 387                  | 540                 | 153              | 7321                    |
| DCM         | 0.218      | 392                  | 538                 | 148              | 6991                    |
| DMSO        | 0.276      | 375                  | 537                 | 162              | 8044                    |
| MeCN        | 0.304      | 376                  | 534                 | 158              | 7869                    |
| MeOH        | 0.308      | 373                  | 536                 | 163              | 8152                    |

**Table S4** Orientation polarizability for solvents ( $\Delta f$ ), absorption and fluorescence emission maxima ( $\lambda_{abs}$ ,  $\lambda_{em}$ , nm) and Stokes shift (nm,  $cm^{-1}$ ) of **6c** in different solvents

| Solvent     | $\Delta f$ | $\lambda_{abs}$ , nm | $\lambda_{em}$ , nm | Stokes shift, nm | Stokes shift, $cm^{-1}$ |
|-------------|------------|----------------------|---------------------|------------------|-------------------------|
| Cyclohexane | 0.001      | 389                  | 537                 | 148              | 7085                    |
| Toluene     | 0.013      | 393                  | 544                 | 151              | 7062                    |
| THF         | 0.209      | 391                  | 550                 | 159              | 7393                    |
| DCM         | 0.218      | 392                  | 546                 | 154              | 7195                    |
| DMSO        | 0.276      | 394                  | 550                 | 156              | 7198                    |
| MeCN        | 0.304      | 390                  | 550                 | 160              | 7459                    |
| MeOH        | 0.308      | 389                  | 557                 | 168              | 7753                    |

**Table S5** Orientation polarizability for solvents ( $\Delta f$ ), absorption and fluorescence emission maxima ( $\lambda_{\text{abs}}$ ,  $\lambda_{\text{em}}$ , nm) and Stokes shift (nm,  $\text{cm}^{-1}$ ) of **6d** in different solvents

| Solvent     | $\Delta f$ | $\lambda_{\text{abs}}$ , nm | $\lambda_{\text{em}}$ , nm | Stokes shift, nm | Stokes shift, $\text{cm}^{-1}$ |
|-------------|------------|-----------------------------|----------------------------|------------------|--------------------------------|
| Cyclohexane | 0.001      | 405                         | 543                        | 138              | 6275                           |
| Toluene     | 0.013      | 424                         | 537                        | 113              | 4963                           |
| THF         | 0.209      | 421                         | 567                        | 146              | 6116                           |
| DCM         | 0.218      | 432                         | 556                        | 124              | 5162                           |
| DMSO        | 0.276      | 427                         | -                          | -                | -                              |
| MeCN        | 0.304      | 420                         | -                          | -                | -                              |

**Table S6** Orientation polarizability for solvents ( $\Delta f$ ), absorption and fluorescence emission maxima ( $\lambda_{\text{abs}}$ ,  $\lambda_{\text{em}}$ , nm) and Stokes shift (nm,  $\text{cm}^{-1}$ ) of **6e** in different solvents

| Solvent     | $\Delta f$ | $\lambda_{\text{abs}}$ , nm | $\lambda_{\text{em}}$ , nm | Stokes shift, nm | Stokes shift, $\text{cm}^{-1}$ |
|-------------|------------|-----------------------------|----------------------------|------------------|--------------------------------|
| Cyclohexane | 0.001      | 360                         | 511                        | 151              | 8208                           |
| Toluene     | 0.013      | 365                         | 516                        | 151              | 8017                           |
| THF         | 0.209      | 377                         | 520                        | 143              | 7294                           |
| DCM         | 0.218      | 367                         | 517                        | 150              | 7905                           |
| DMSO        | 0.276      | 377                         | 466                        | 89               | 5066                           |
| MeCN        | 0.304      | 375                         | 517                        | 142              | 7324                           |
| MeOH        | 0.308      | 370                         | 518                        | 148              | 7722                           |

**Table S7** Orientation polarizability for solvents ( $\Delta f$ ), absorption and fluorescence emission maxima ( $\lambda_{\text{abs}}$ ,  $\lambda_{\text{em}}$ , nm) and Stokes shift (nm,  $\text{cm}^{-1}$ ) of **6f** in different solvents

| Solvent     | $\Delta f$ | $\lambda_{\text{abs}}$ , nm | $\lambda_{\text{em}}$ , nm | Stokes shift, nm | Stokes shift, $\text{cm}^{-1}$ |
|-------------|------------|-----------------------------|----------------------------|------------------|--------------------------------|
| Cyclohexane | 0.001      | 391                         | 524                        | 133              | 6491                           |
| Toluene     | 0.013      | 393                         | 527                        | 134              | 6469                           |
| THF         | 0.209      | 392                         | 524                        | 132              | 6426                           |
| DCM         | 0.218      | 392                         | 526                        | 134              | 6498                           |
| DMSO        | 0.276      | 394                         | 548                        | 154              | 7132                           |
| MeCN        | 0.304      | 391                         | 534                        | 143              | 6849                           |
| MeOH        | 0.308      | 389                         | 570                        | 181              | 8163                           |

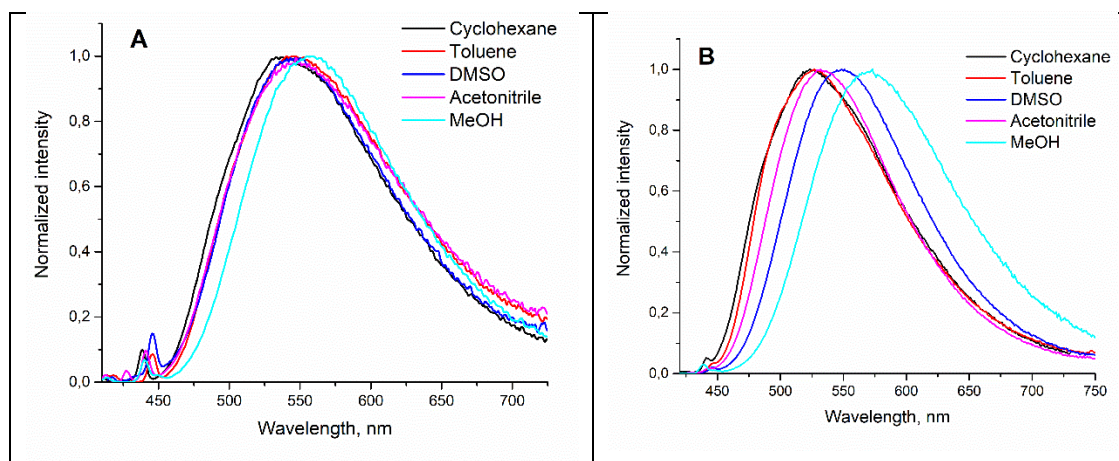**Figure S1.** Solvent effect of **6c** and **6f**

### 3. Preparation of PVA films

Polyvinyl alcohol (PVA) (0.10 g) was dissolved in hot water (5000  $\mu\text{L}$ ). The solution of fluorophore ( $C = 10^{-3}\text{M}$ , 100  $\mu\text{L}$ ) in THF was added dropwise to the water mixture of oligomer under stirring, and then glycerol (30  $\mu\text{L}$ ) was added. The mixture was stirred for 5 more minutes, then the oligomer was spread on a substrate and left for a 24 h at room temperature. The final concentration of chromophore was  $10^{-5}\text{M}$ .

### 4. Aggregation study

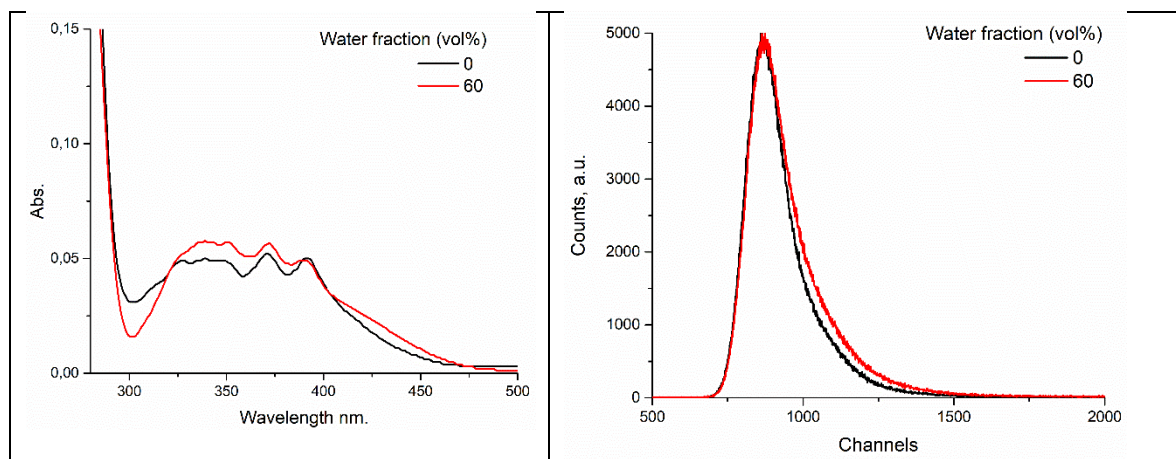

**Figure S2.** UV-*vis* absorption spectra of **6c** in THF/water mixtures with water fractions 0/60% (A). Time-resolved emission decay curves of **6c** in THF/water mixtures with water fractions 0/60% (B).

**Table S8** Fluorescence lifetime of probe **6c** ( $C = 2 \times 10^{-6}\text{M}$ ) in THF/water mixtures with water fractions 0/60 (vol%)

| Water fraction (vol%) | $\tau_1$ , ns <sup>a</sup> | $\alpha_1$ <sup>b</sup> | $\tau_2$ , ns <sup>a</sup> | $\alpha_2$ <sup>b</sup> | $\tau$ , ns <sup>a</sup> | $\chi^2$ <sup>d</sup> |
|-----------------------|----------------------------|-------------------------|----------------------------|-------------------------|--------------------------|-----------------------|
| 0                     | 9.415322                   | 90.64                   | 2.668804                   | 9.36                    | 8.78                     | 1.140033              |
| 60                    | 7.790384                   | 81.20                   | 3.116154                   | 18.80                   | 6.91                     | 1.240673              |

<sup>a</sup> Decay time, <sup>b</sup> Fractional contribution, <sup>c</sup> Weighted average decay time  $\tau_{av} = \sum (\tau_i \times \alpha_i)$ , <sup>d</sup> Quality of fitting

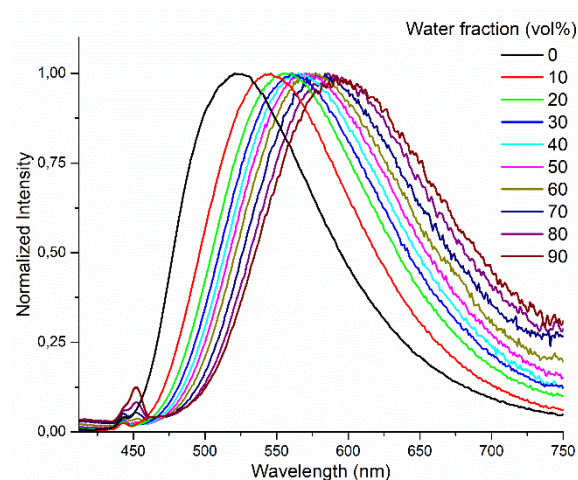

**Figure S3.** Solvent effect for **6f** in THF/water

## 5. Mechanochromic properties

**Table S9.** Mechanochromic properties of probes **6a-f**

| #         | Normal condition                        |                             | After grinding                          |                             | After fuming                            |                             |
|-----------|-----------------------------------------|-----------------------------|-----------------------------------------|-----------------------------|-----------------------------------------|-----------------------------|
|           | $\lambda_{\text{em}}^{\text{max}}$ , nm | $\Phi_f$ , (%) <sup>a</sup> | $\lambda_{\text{em}}^{\text{max}}$ , nm | $\Phi_f$ , (%) <sup>a</sup> | $\lambda_{\text{em}}^{\text{max}}$ , nm | $\Phi_f$ , (%) <sup>a</sup> |
| <b>6a</b> | 572                                     | 20.5                        | 567                                     | 23.2                        | 562                                     | 20.8                        |
| <b>6b</b> | 517                                     | 17.8                        | 518                                     | 15.6                        | 518                                     | 20.8                        |
| <b>6c</b> | 511                                     | 3.9                         | 542                                     | 4.9                         | 522                                     | 5.8                         |
| <b>6d</b> | 626                                     | 8.3                         | 620                                     | 6.9                         | 611                                     | 10.9                        |
| <b>6e</b> | 509                                     | 19.3                        | 512                                     | 10.5                        | 510                                     | 19.4                        |
| <b>6f</b> | 525                                     | 3.4                         | 535                                     | 4.6                         | 524                                     | 7.31                        |

<sup>a</sup> Absolute quantum yields were measured using the Integrating Sphere of the Horiba -Fluoromax-4 at r.t. in powder form.

## 6. Spectra of new compounds

N-(4-Dimethylaminobenzylidene)-1H-benzo[d]imidazol-2-amine (3a)

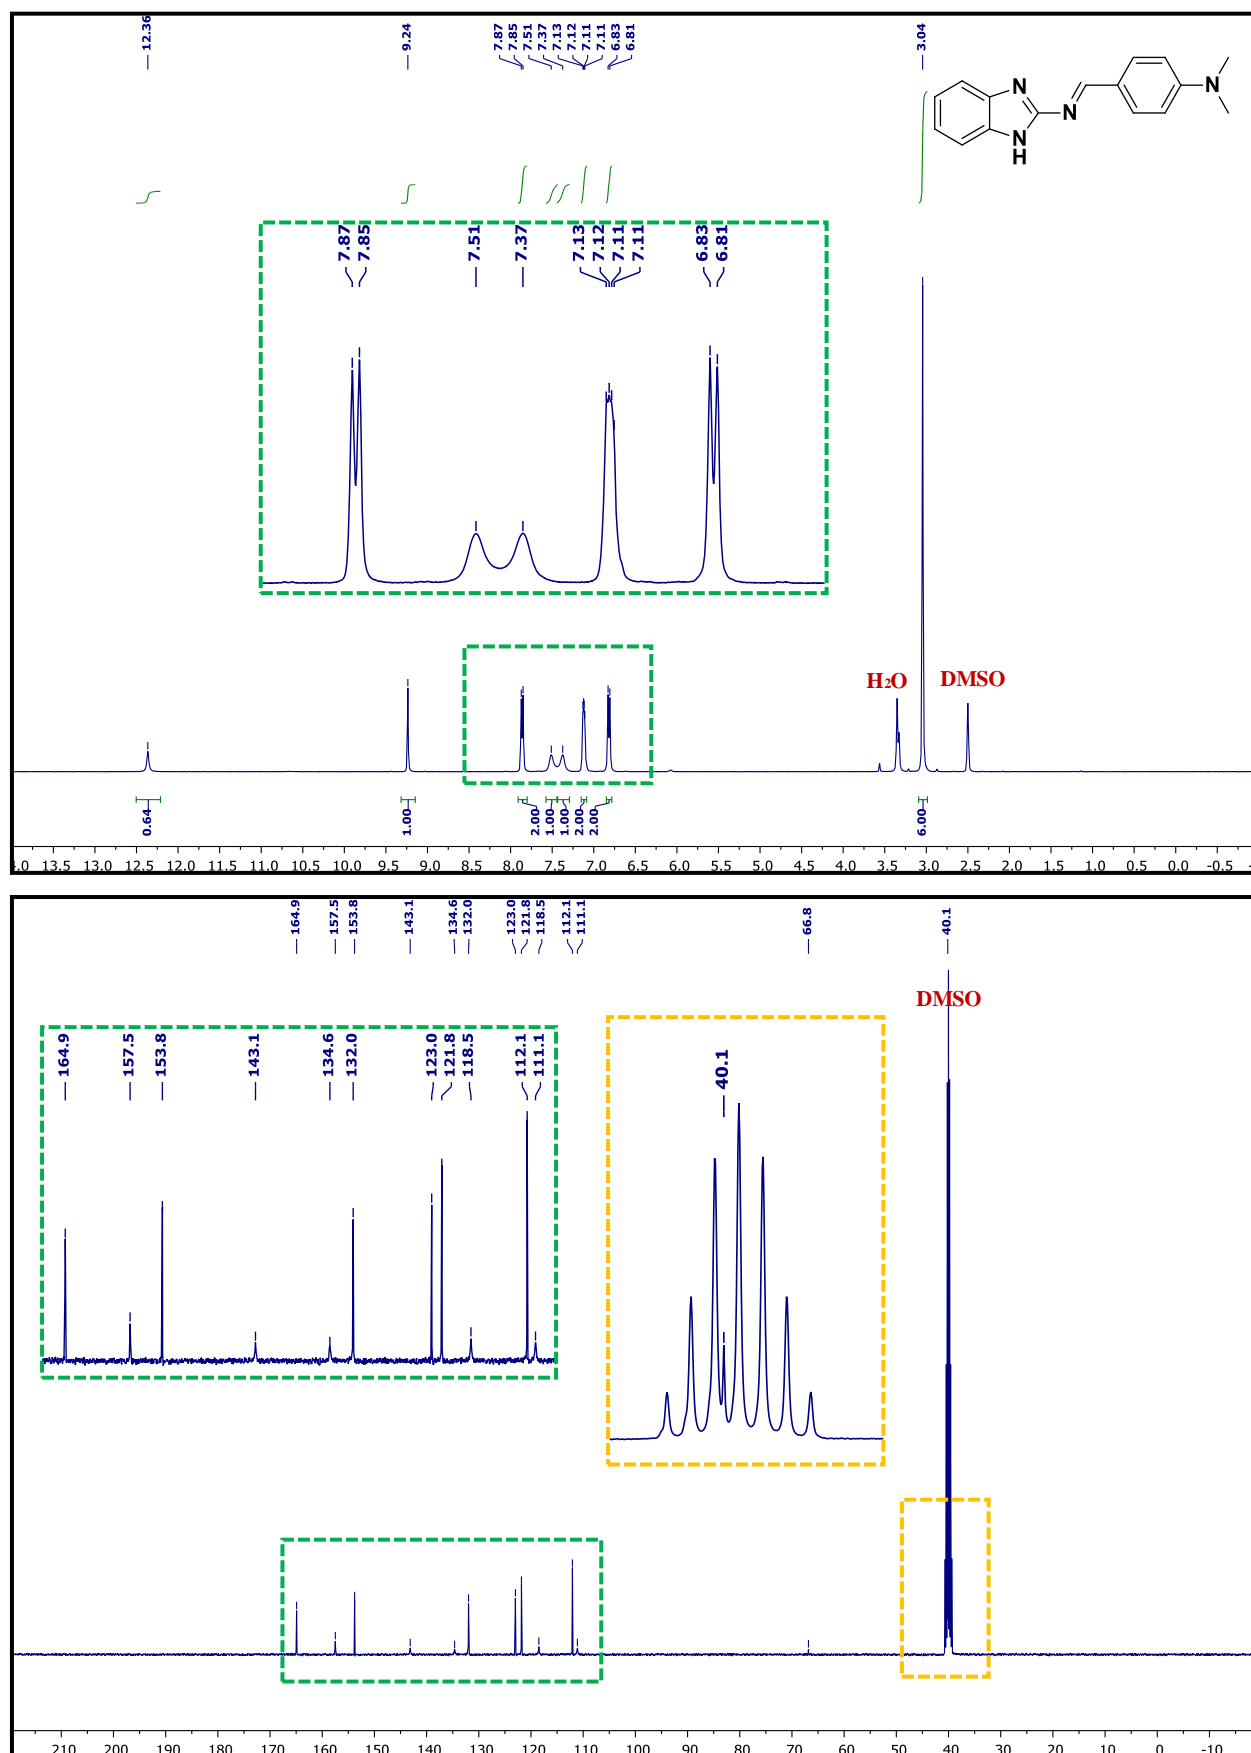Figure S4. <sup>1</sup>H NMR (400 MHz, DMSO-*d*<sub>6</sub>) and <sup>13</sup>C NMR (100 MHz, DMSO-*d*<sub>6</sub>) spectra of 3a

## N-(anthracen-9-ylidene)-1H-benzo[d]imidazol-2-amine (3c)

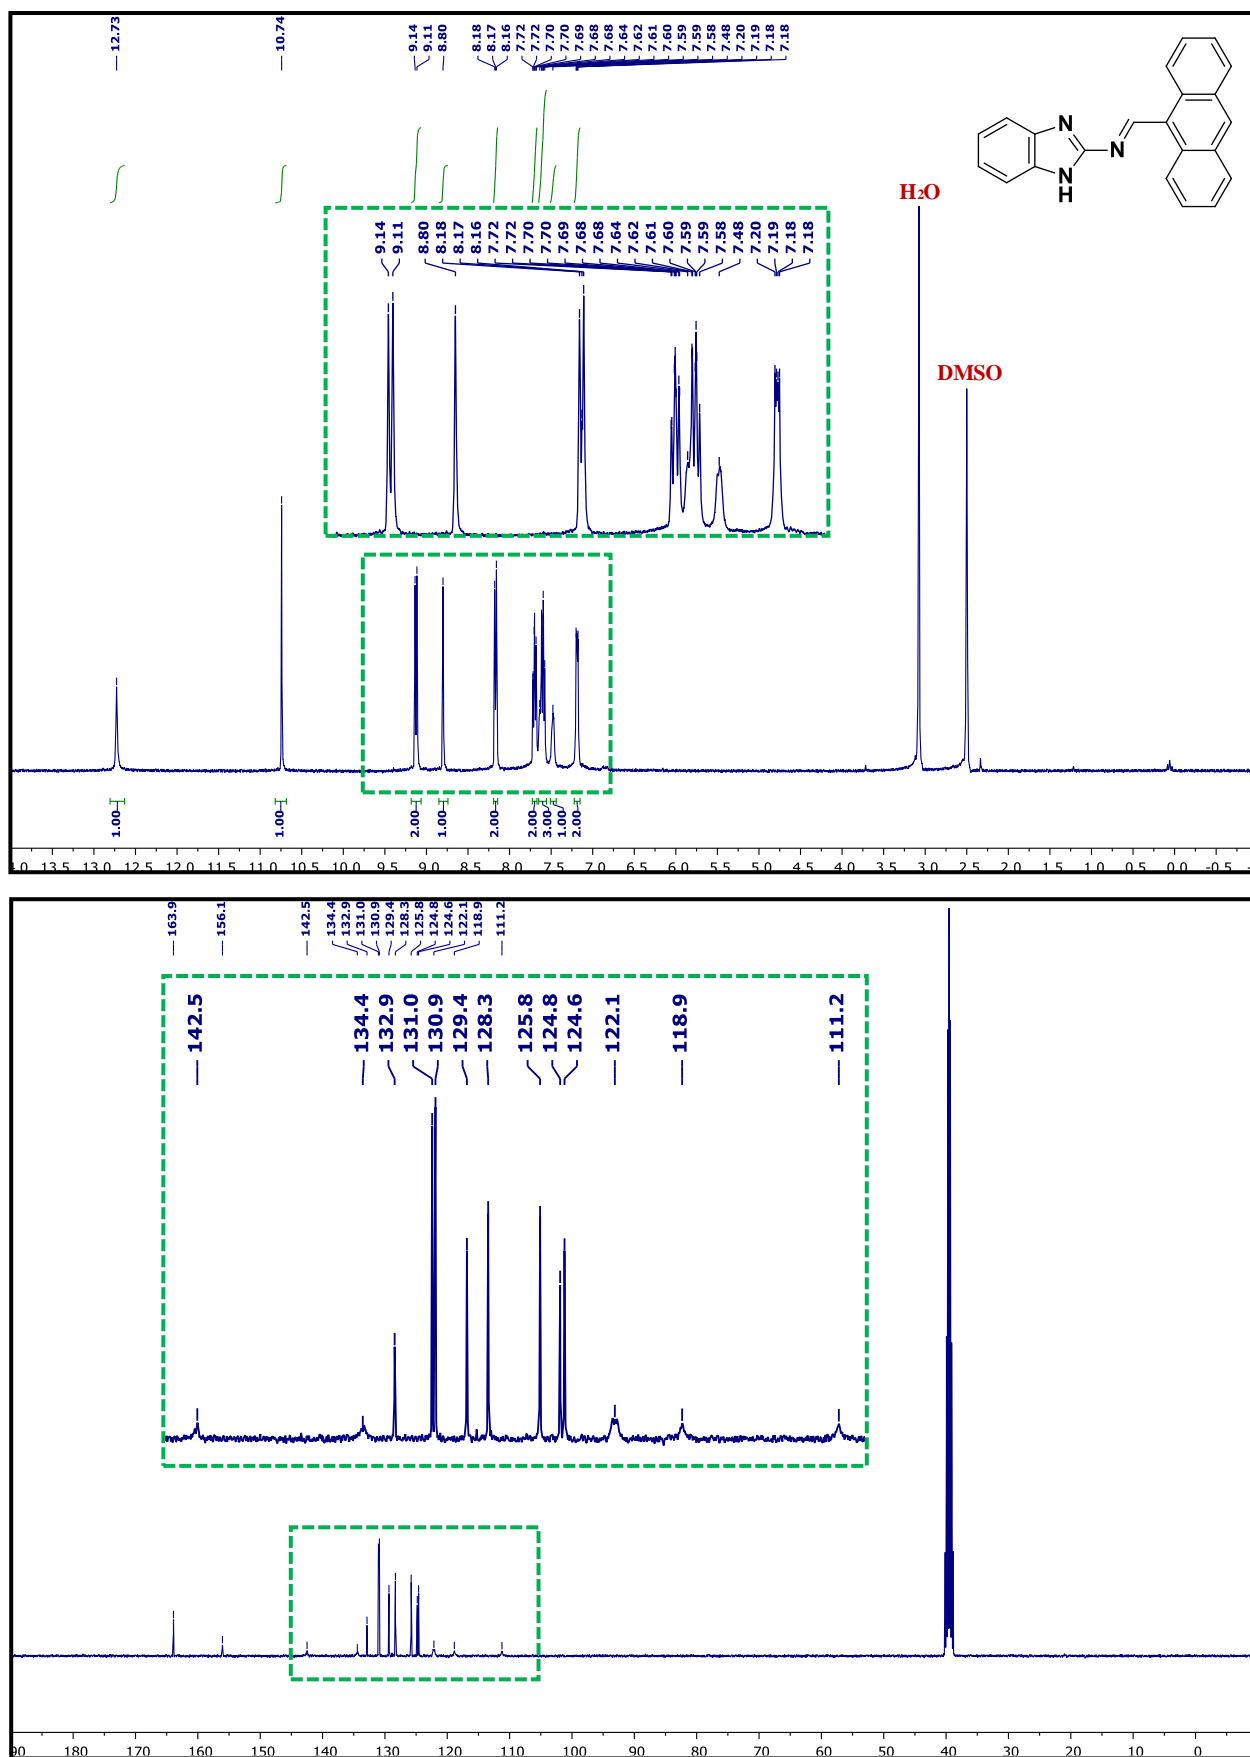Figure S5. <sup>1</sup>H NMR (400 MHz, DMSO-*d*<sub>6</sub>) and <sup>13</sup>C NMR (100 MHz, DMSO-*d*<sub>6</sub>) spectra of 3c



## 5,6-Difluoro-N-(4-dimethylaminobenzylidene)-1H-benzo[d]imidazol-2-amine (3d)

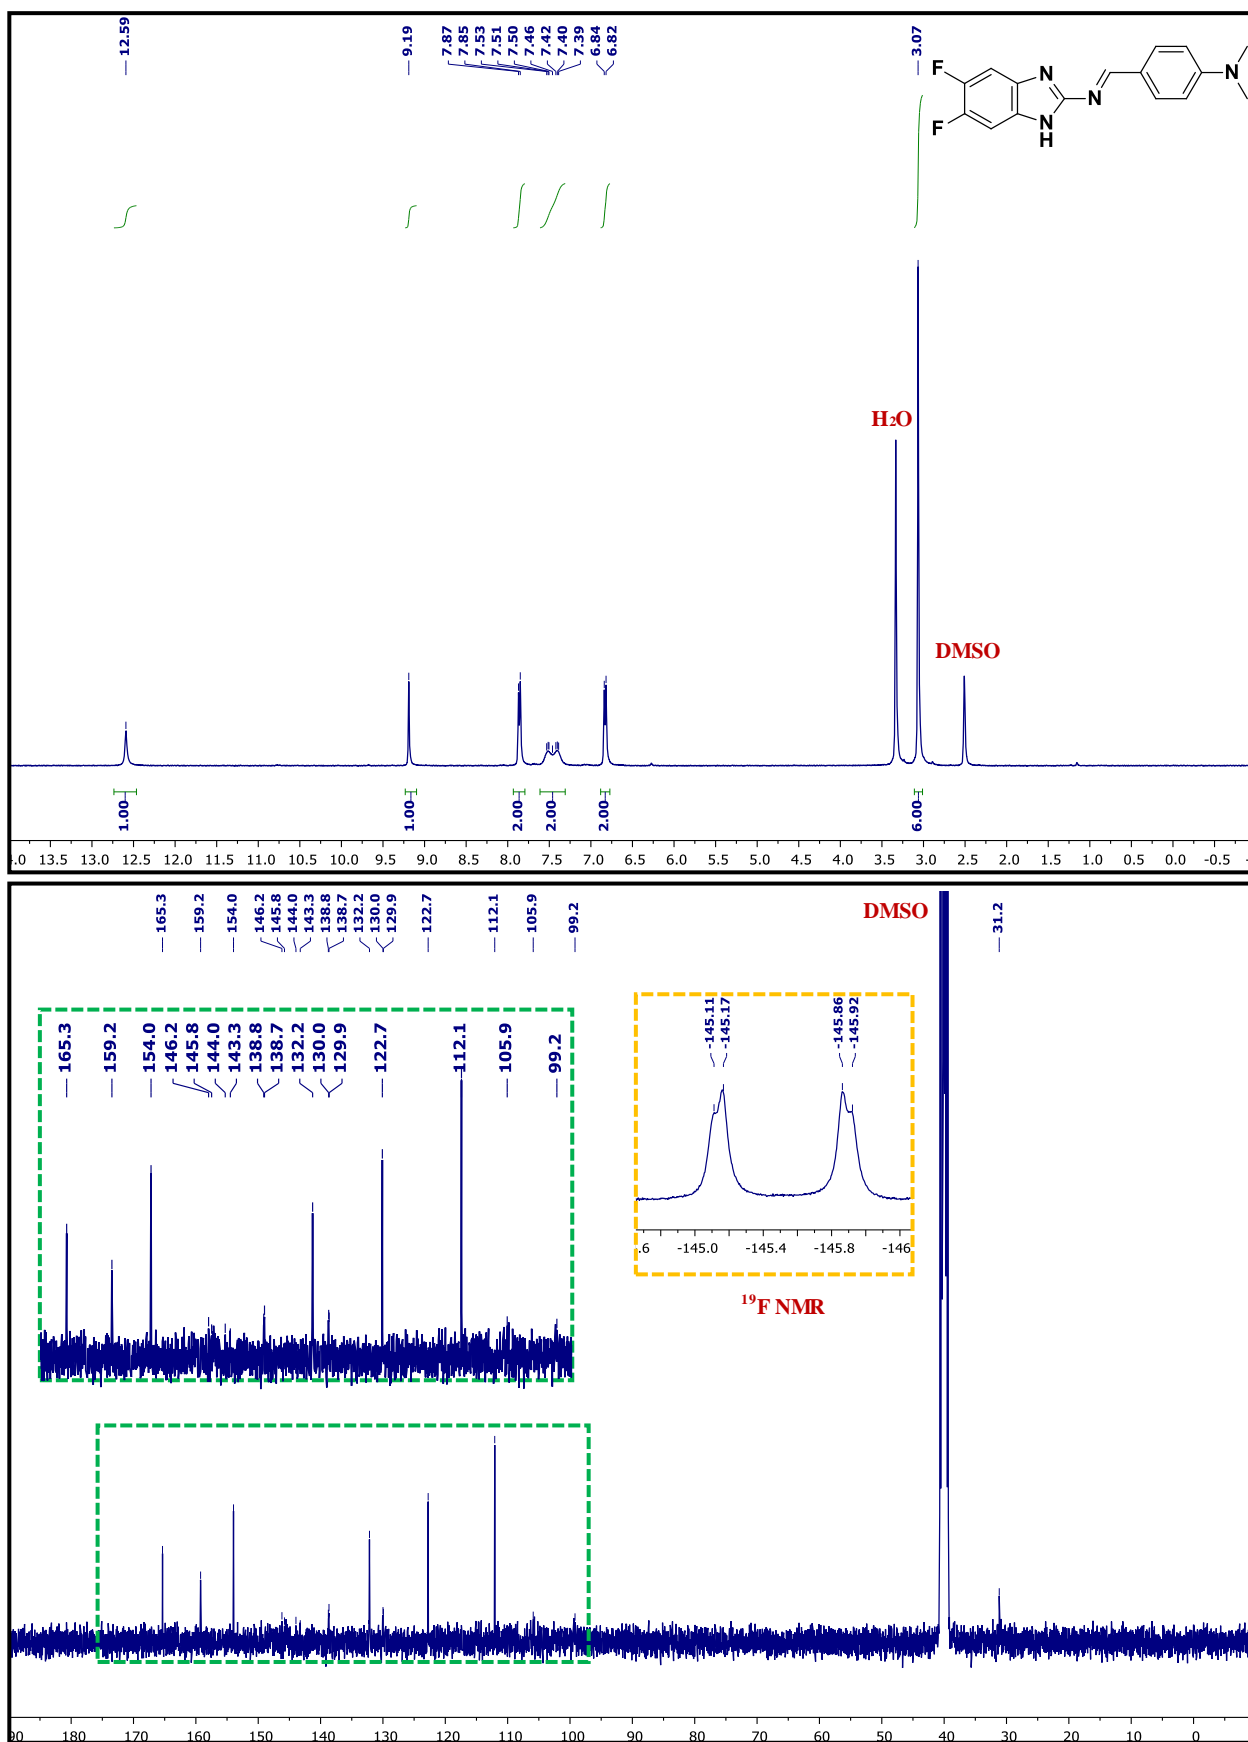

Figure S6. <sup>1</sup>H NMR (400 MHz, DMSO-*d*<sub>6</sub>), <sup>13</sup>C NMR (100 MHz, DMSO-*d*<sub>6</sub>), and <sup>19</sup>F NMR (376 MHz, DMSO-*d*<sub>6</sub>) spectra of 3d

## 5,6-Difluoro-N-(4-methoxybenzylidene)-1H-benzo[d]imidazol-2-amine (3e)

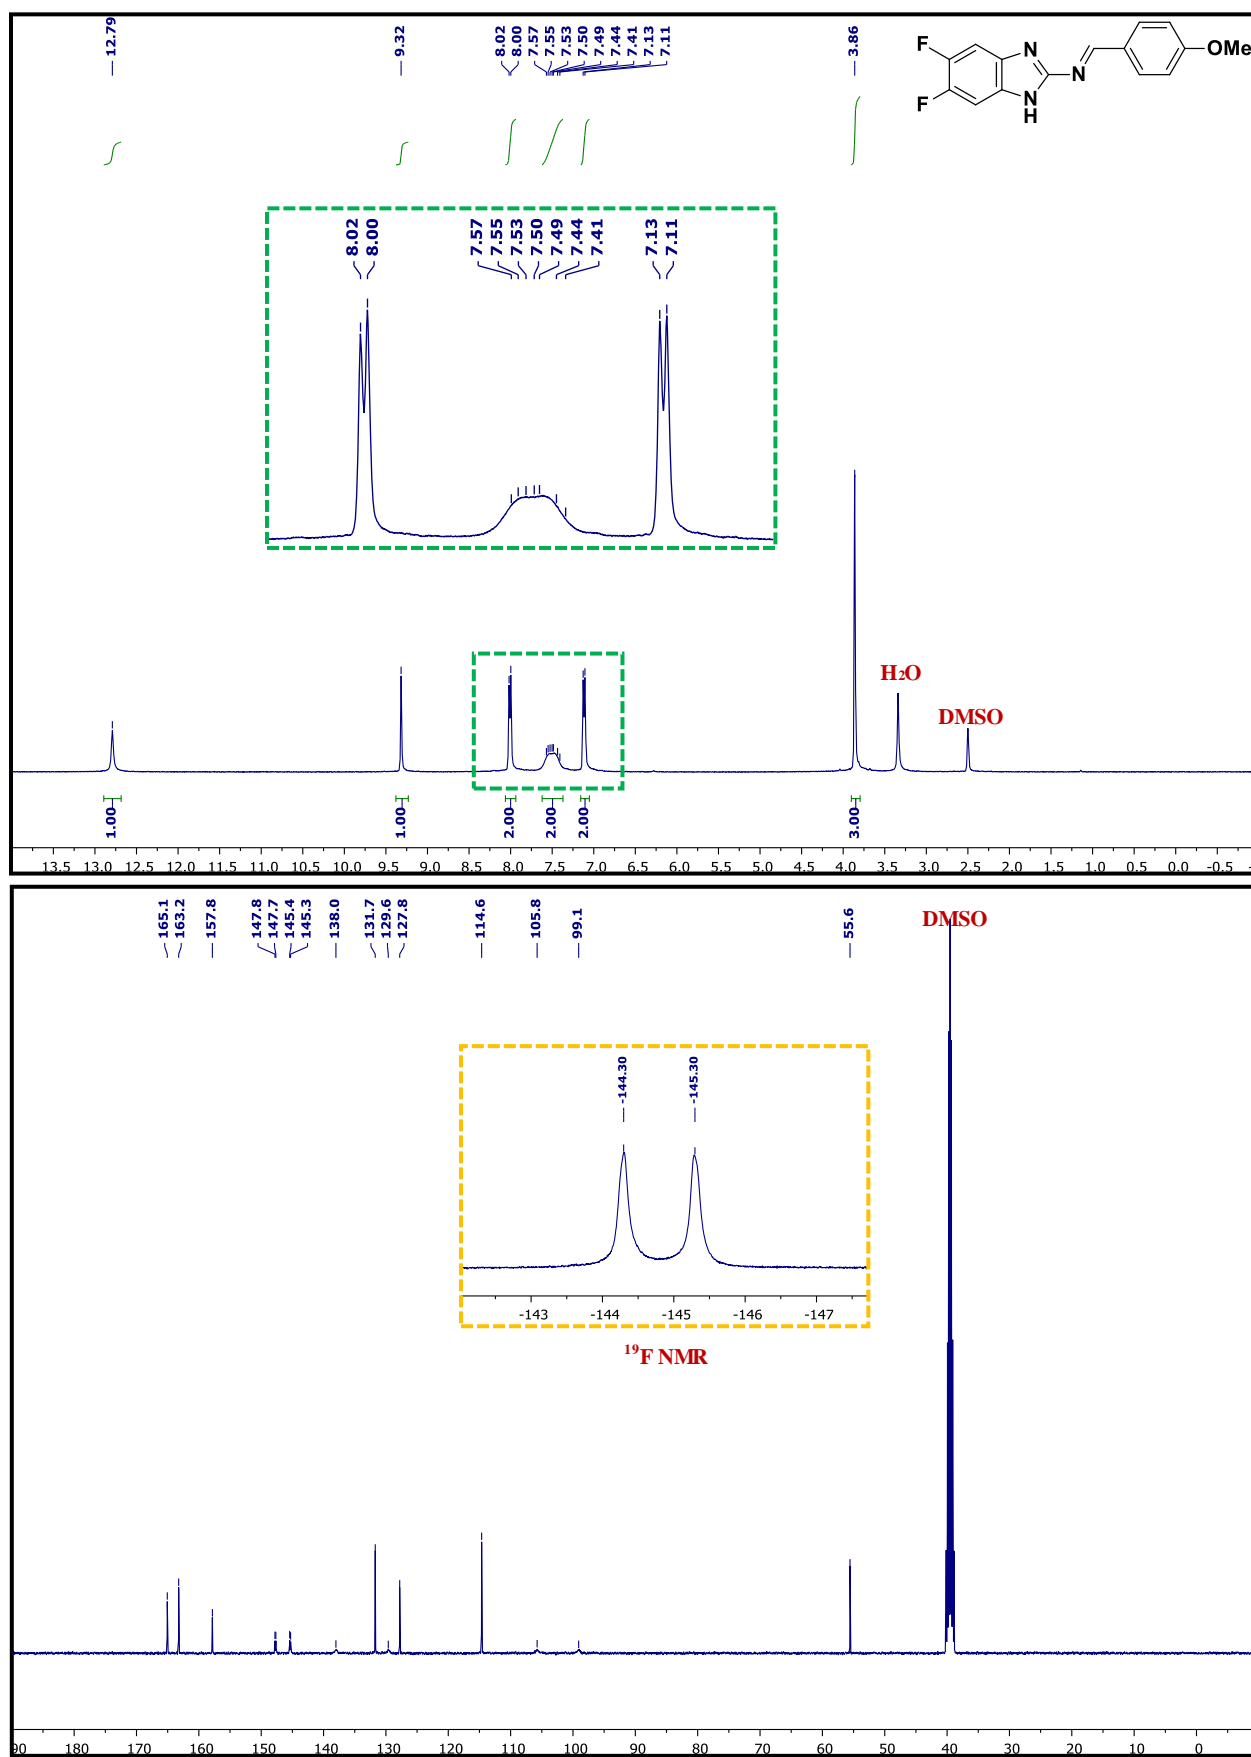

Figure S7. <sup>1</sup>H NMR (400 MHz, DMSO-*d*<sub>6</sub>), <sup>13</sup>C NMR (100 MHz, DMSO-*d*<sub>6</sub>), and <sup>19</sup>F NMR (376 MHz, DMSO-*d*<sub>6</sub>) spectra of 3e

## 5,6-Difluoro-N-(anthracen-9-ylidene)-1H-benzo[d]imidazol-2-amine (3f)

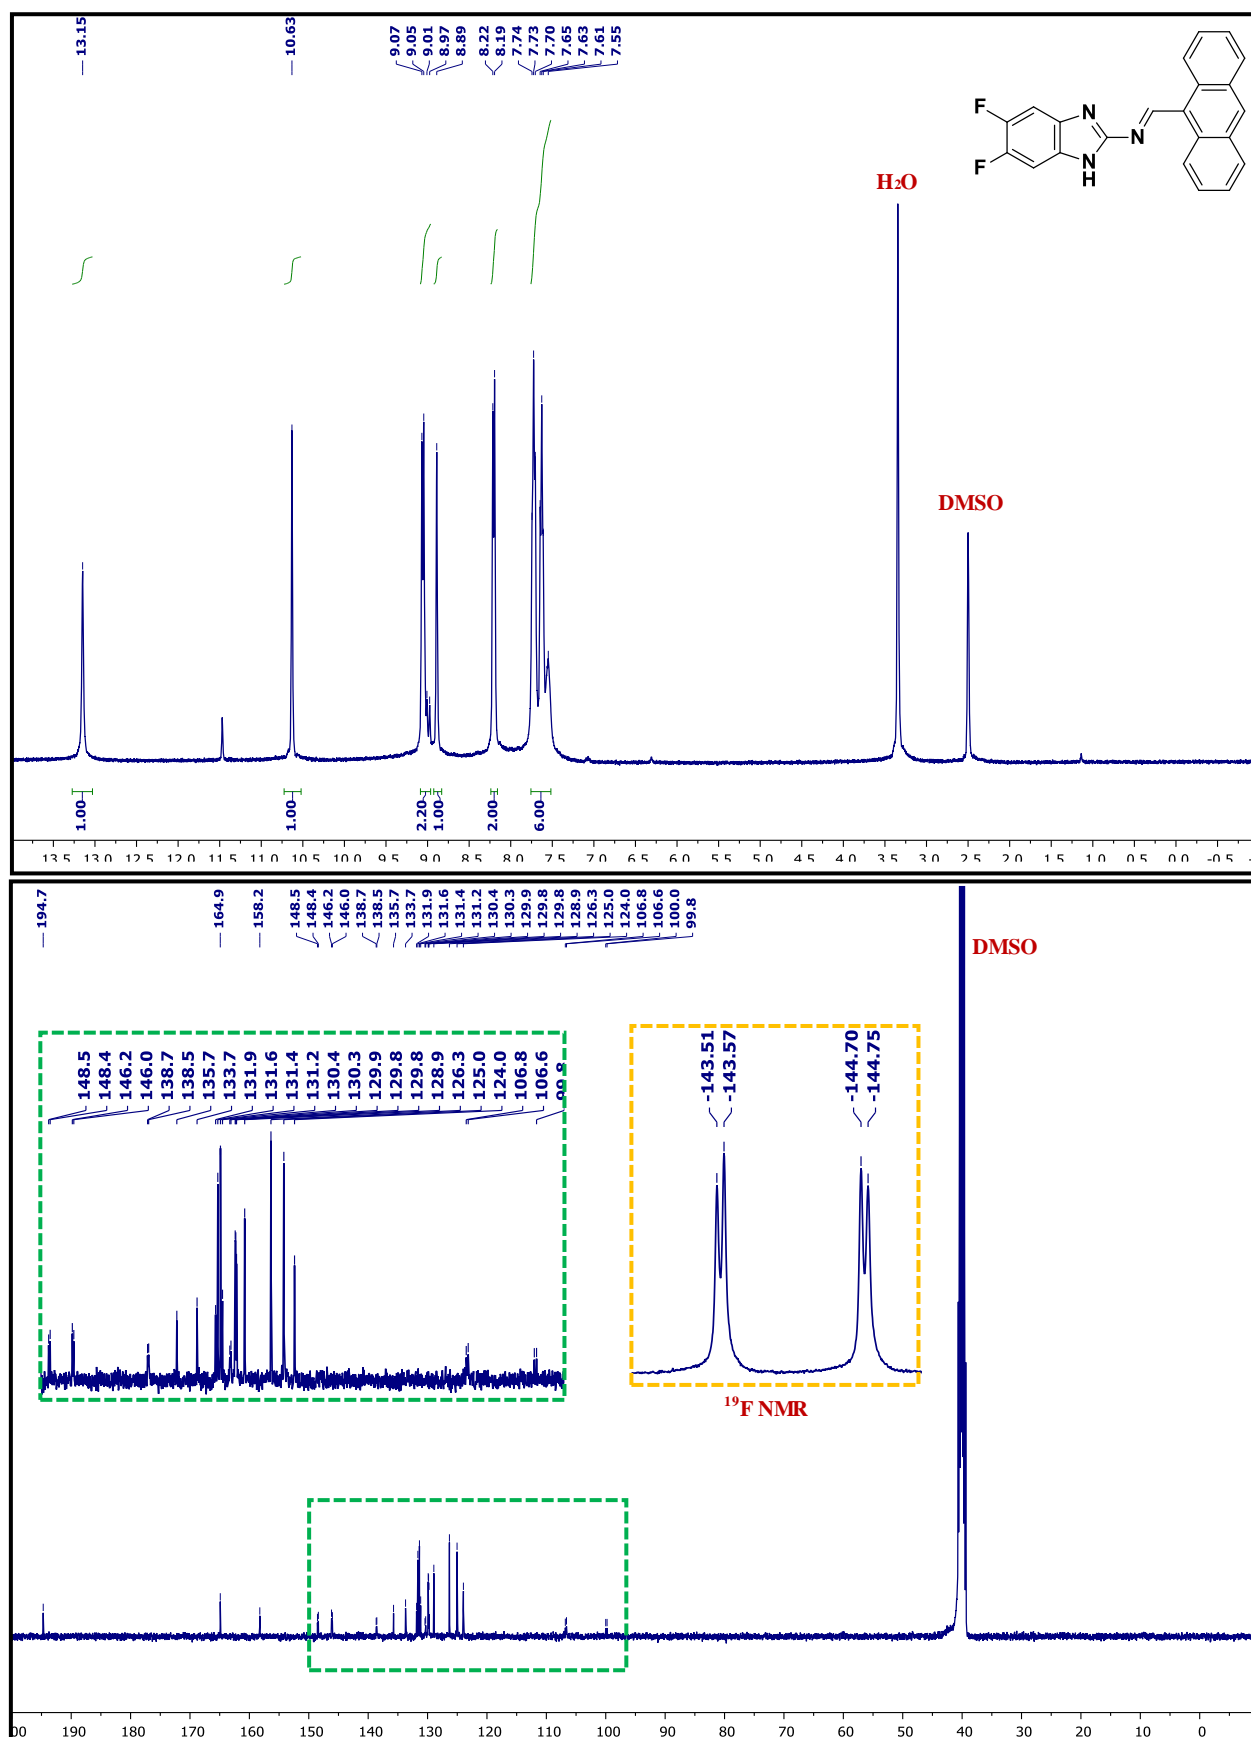

Figure S8. <sup>1</sup>H NMR (400 MHz, DMSO-*d*<sub>6</sub>), <sup>13</sup>C NMR (100 MHz, DMSO-*d*<sub>6</sub>), and <sup>19</sup>F NMR (376 MHz, DMSO-*d*<sub>6</sub>) spectra of 3f

4-(4-(Dimethylamino)phenyl)-1,2-dihydrobenzo[4,5]imidazo[1,2-a]pyrimidine-3-carbonitrile (**5a**)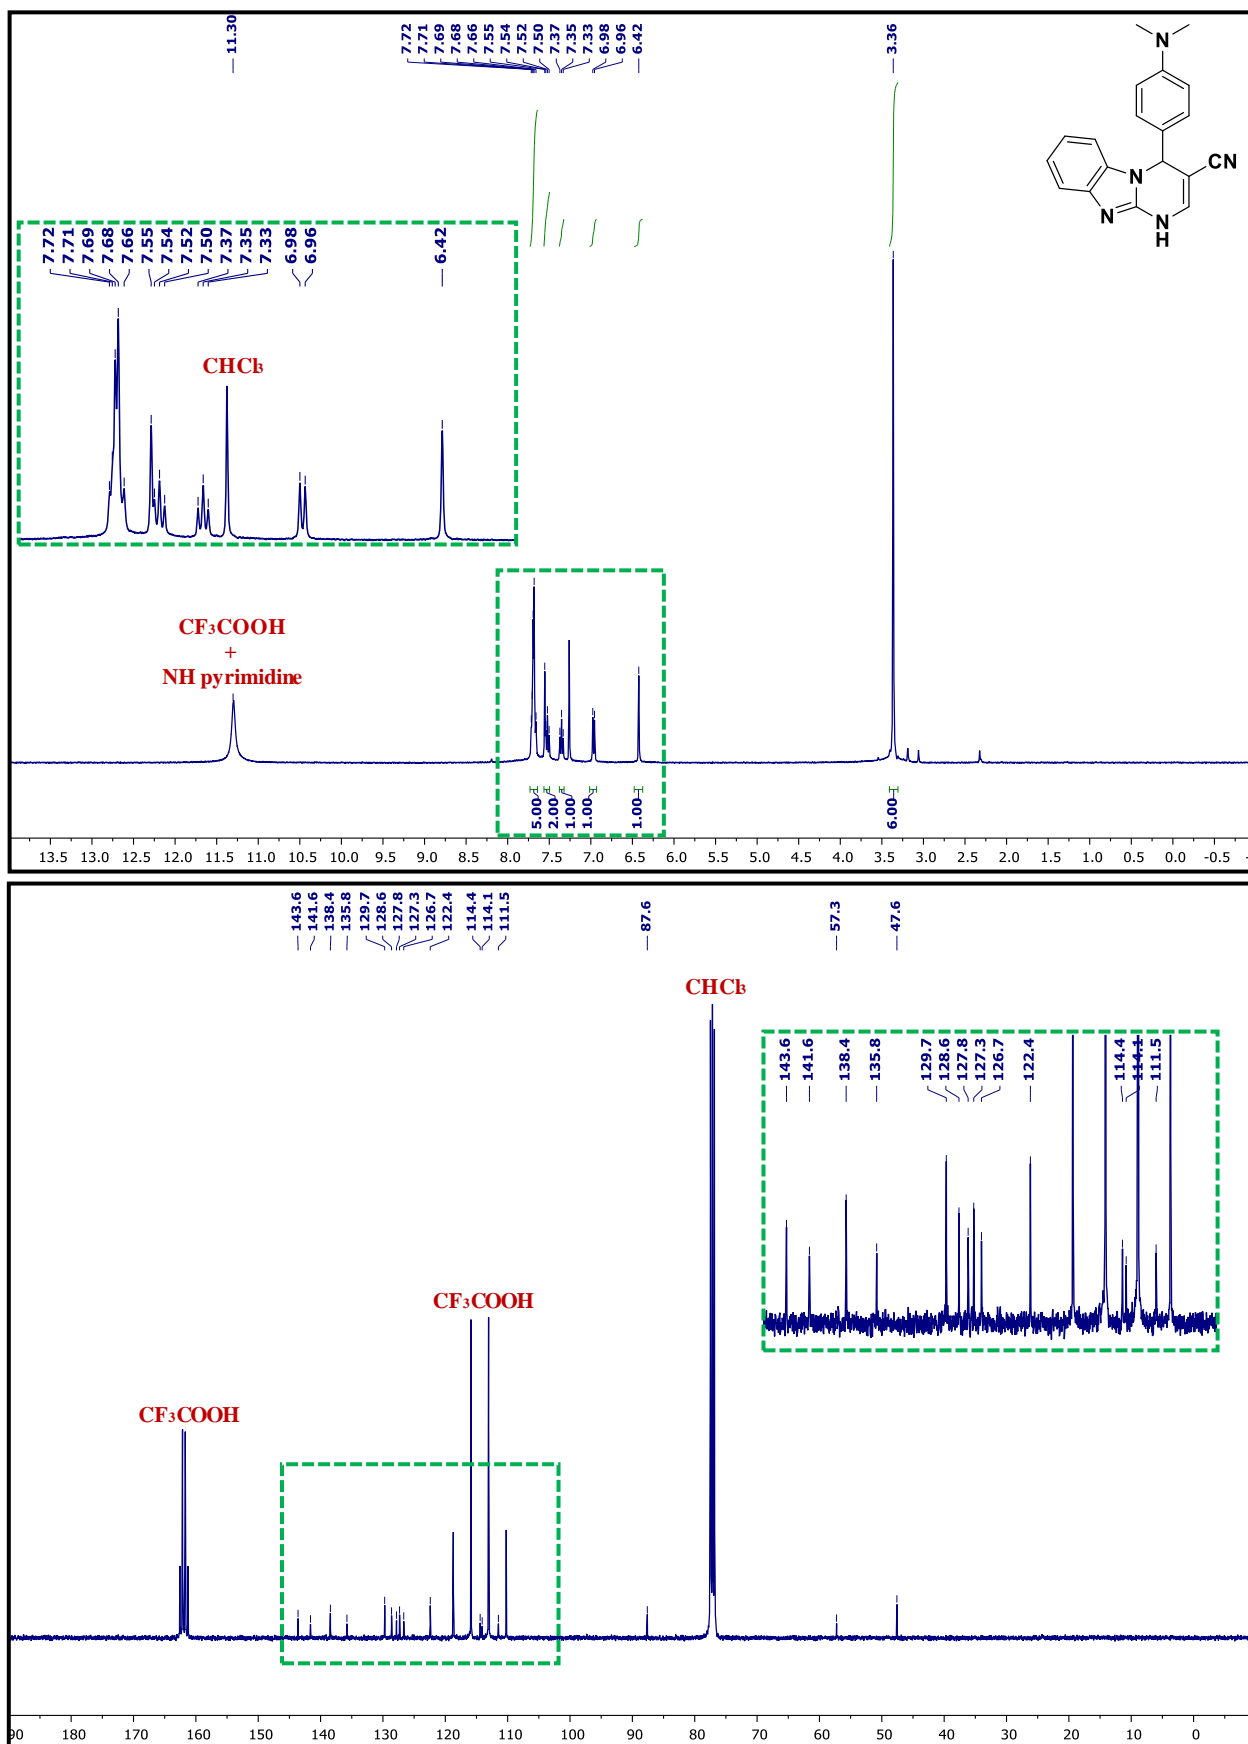

Figure S9. <sup>1</sup>H NMR (CDCl<sub>3</sub> + 0.1 ml CF<sub>3</sub>COOD) and <sup>13</sup>C NMR (100 MHz, CDCl<sub>3</sub> + 0.1 ml CF<sub>3</sub>COOD) spectra of **5a**

4-(4-Methoxyphenyl)-1,2-dihydrobenzo[4,5]imidazo[1,2-a]pyrimidine-3-carbonitrile (**5b**)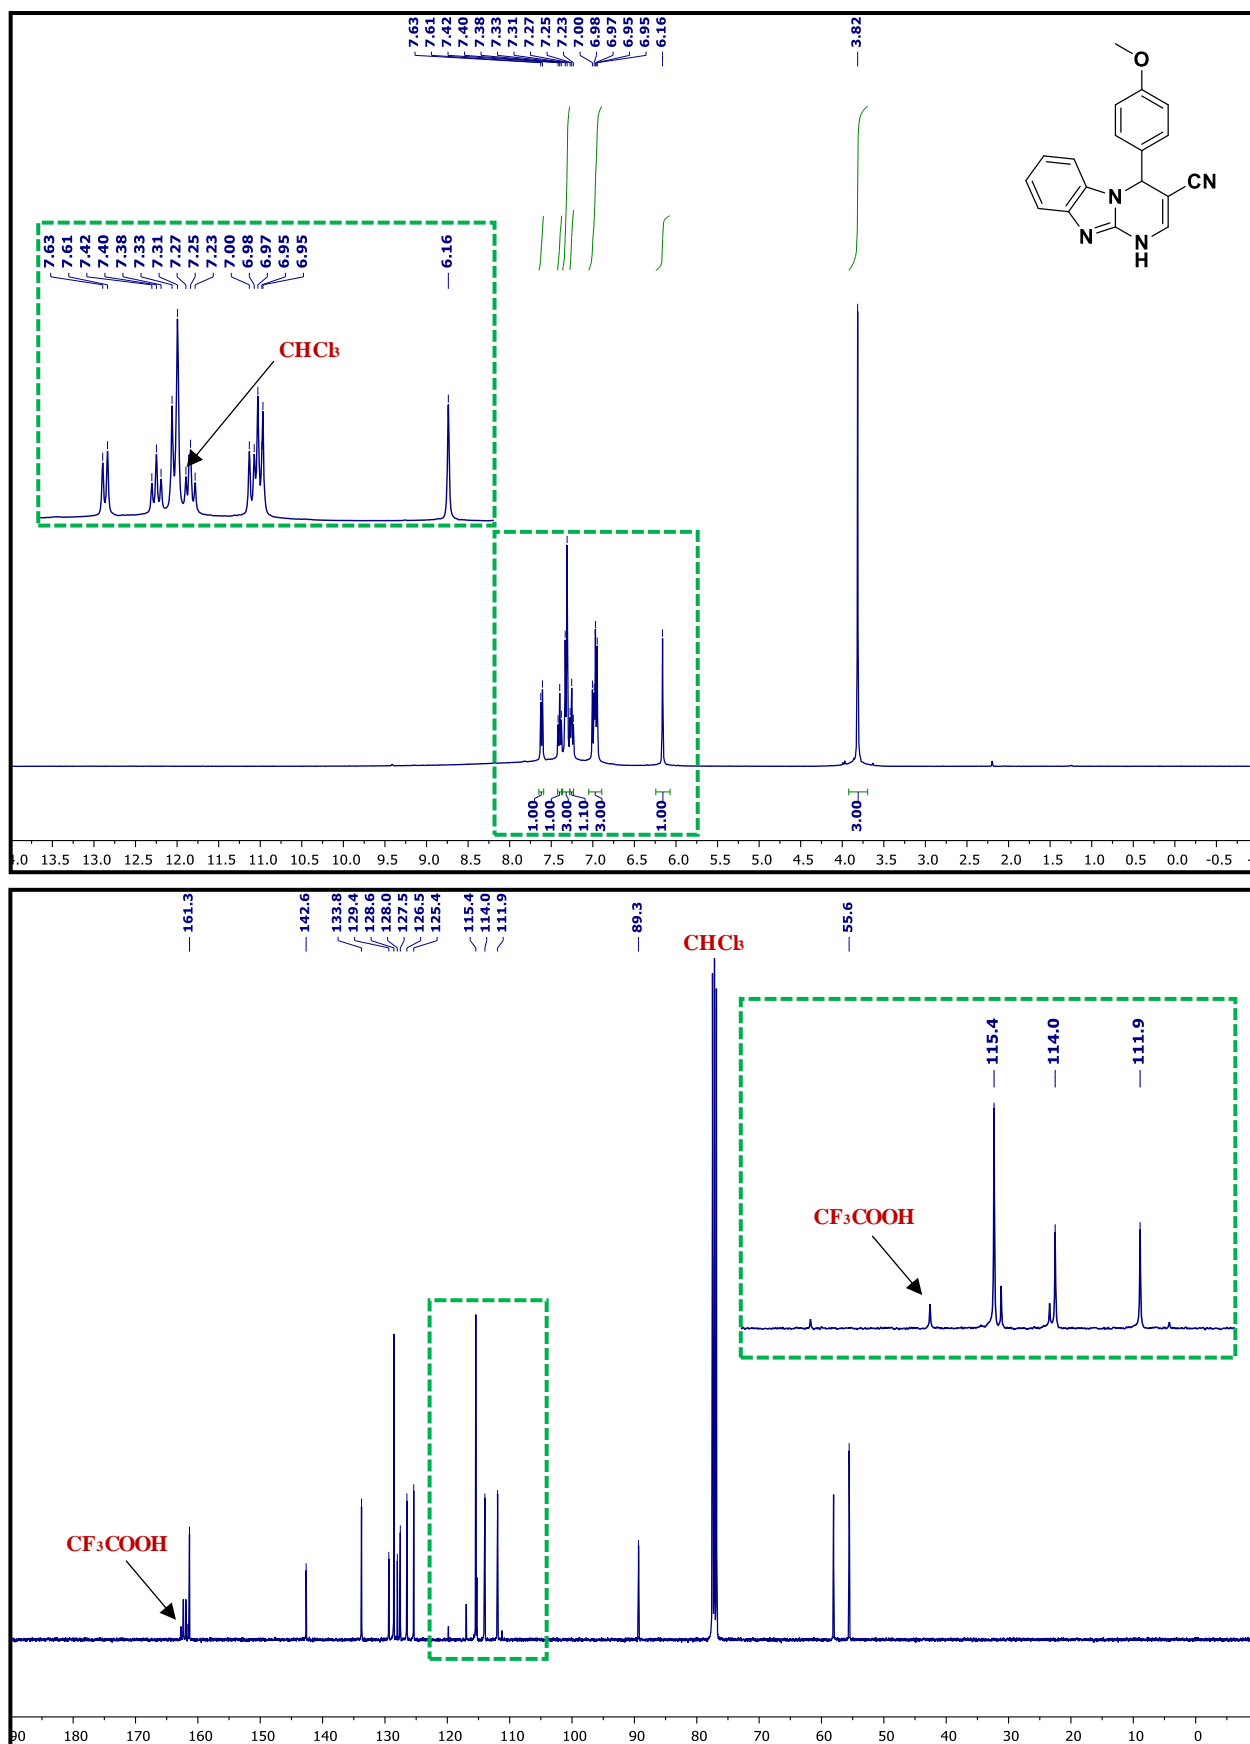

**Figure S10.** <sup>1</sup>H NMR (CDCl<sub>3</sub> + 0.1 ml CF<sub>3</sub>COOD) and <sup>13</sup>C NMR (100 MHz, CDCl<sub>3</sub> + 0.1 ml CF<sub>3</sub>COOD) spectra of **5b**

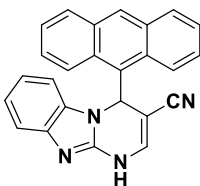

**Figure S11.**  $^1\text{H}$  NMR ( $\text{CDCl}_3 + 0.1 \text{ ml CF}_3\text{COOD}$ ) and  $^{13}\text{C}$  NMR (100 MHz,  $\text{CDCl}_3 + 0.1 \text{ ml CF}_3\text{COOD}$ ) spectra of **5c**

4-(4-(Dimethylamino)phenyl)-7,8-difluoro-1,2-dihydrobenzo[4,5]imidazo[1,2-a]pyrimidine-3-carbonitrile (5d).

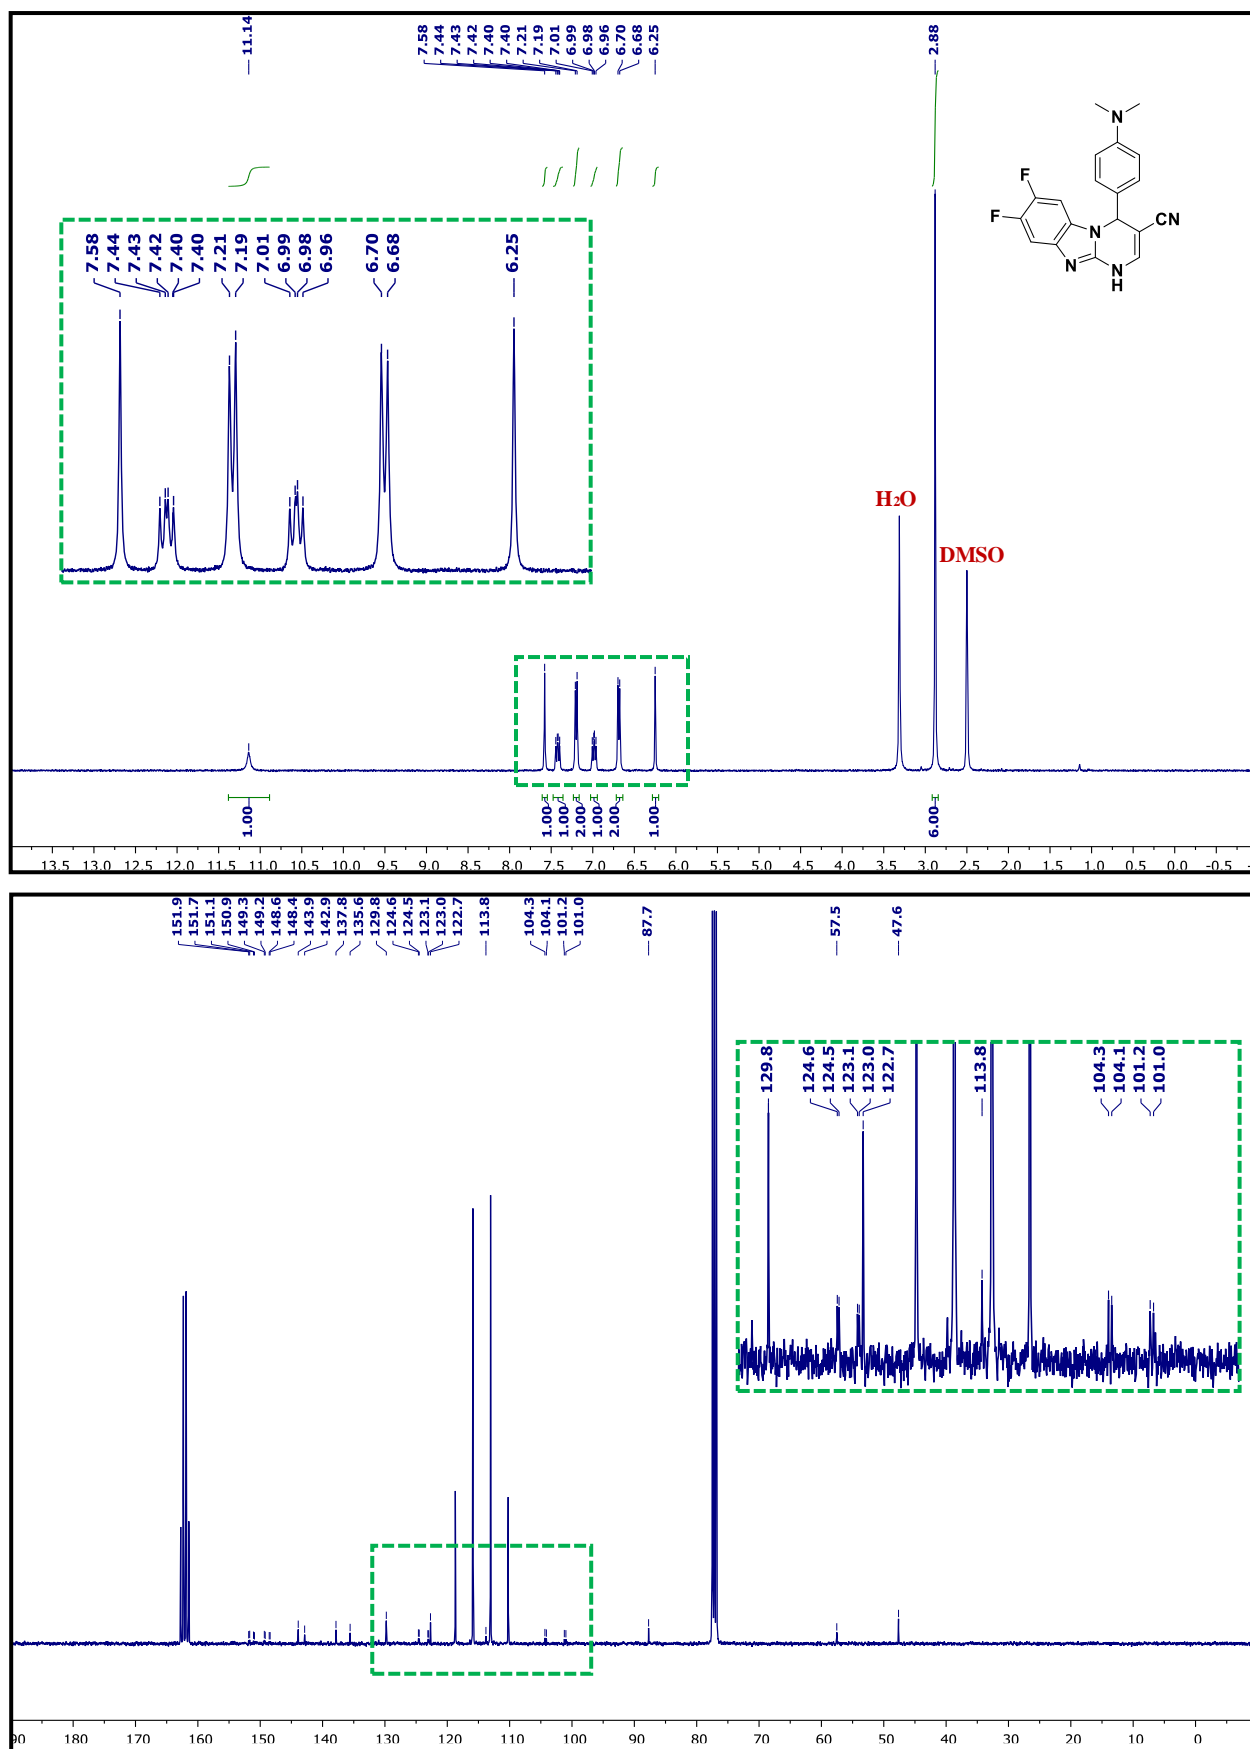

Figure S12. <sup>1</sup>H NMR (400 MHz, DMSO-*d*<sub>6</sub>) and <sup>13</sup>C NMR (100 MHz, CDCl<sub>3</sub> + 0.1 ml CF<sub>3</sub>COOD) spectra of 5d

7,8-Difluoro-4-(4-methoxyphenyl)-1,2-dihydrobenzo[4,5]imidazo[1,2-a]pyrimidine-3-carbonitrile (**5e**)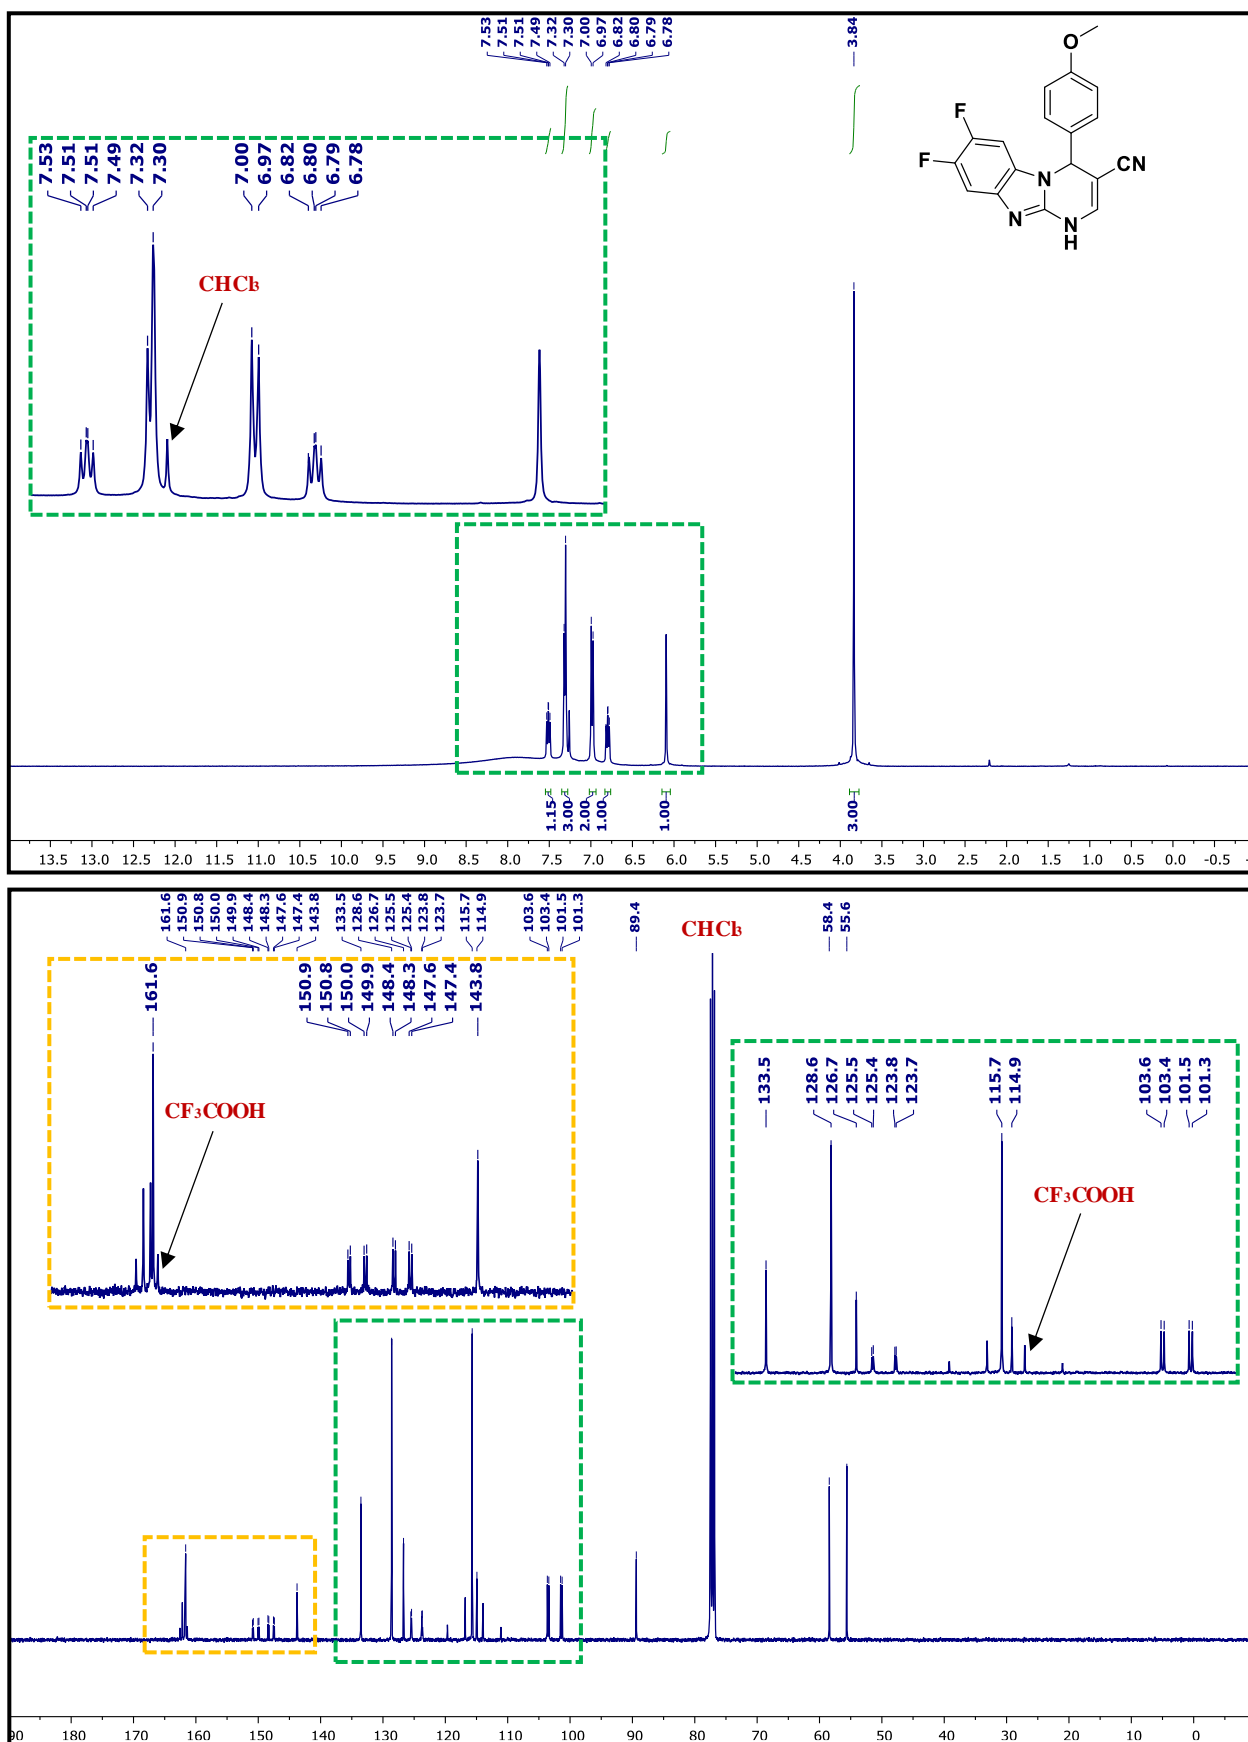

Figure S13. <sup>1</sup>H NMR (CDCl<sub>3</sub> + 0.1 ml CF<sub>3</sub>COOD) and <sup>13</sup>C NMR (100 MHz, CDCl<sub>3</sub> + 0.1 ml CF<sub>3</sub>COOD) spectra of **5e**



4-(Anthracen-9-yl)-7,8-difluoro-1,2-dihydrobenzo[4,5]imidazo[1,2-a]pyrimidine-3-carbonitrile (**5f**).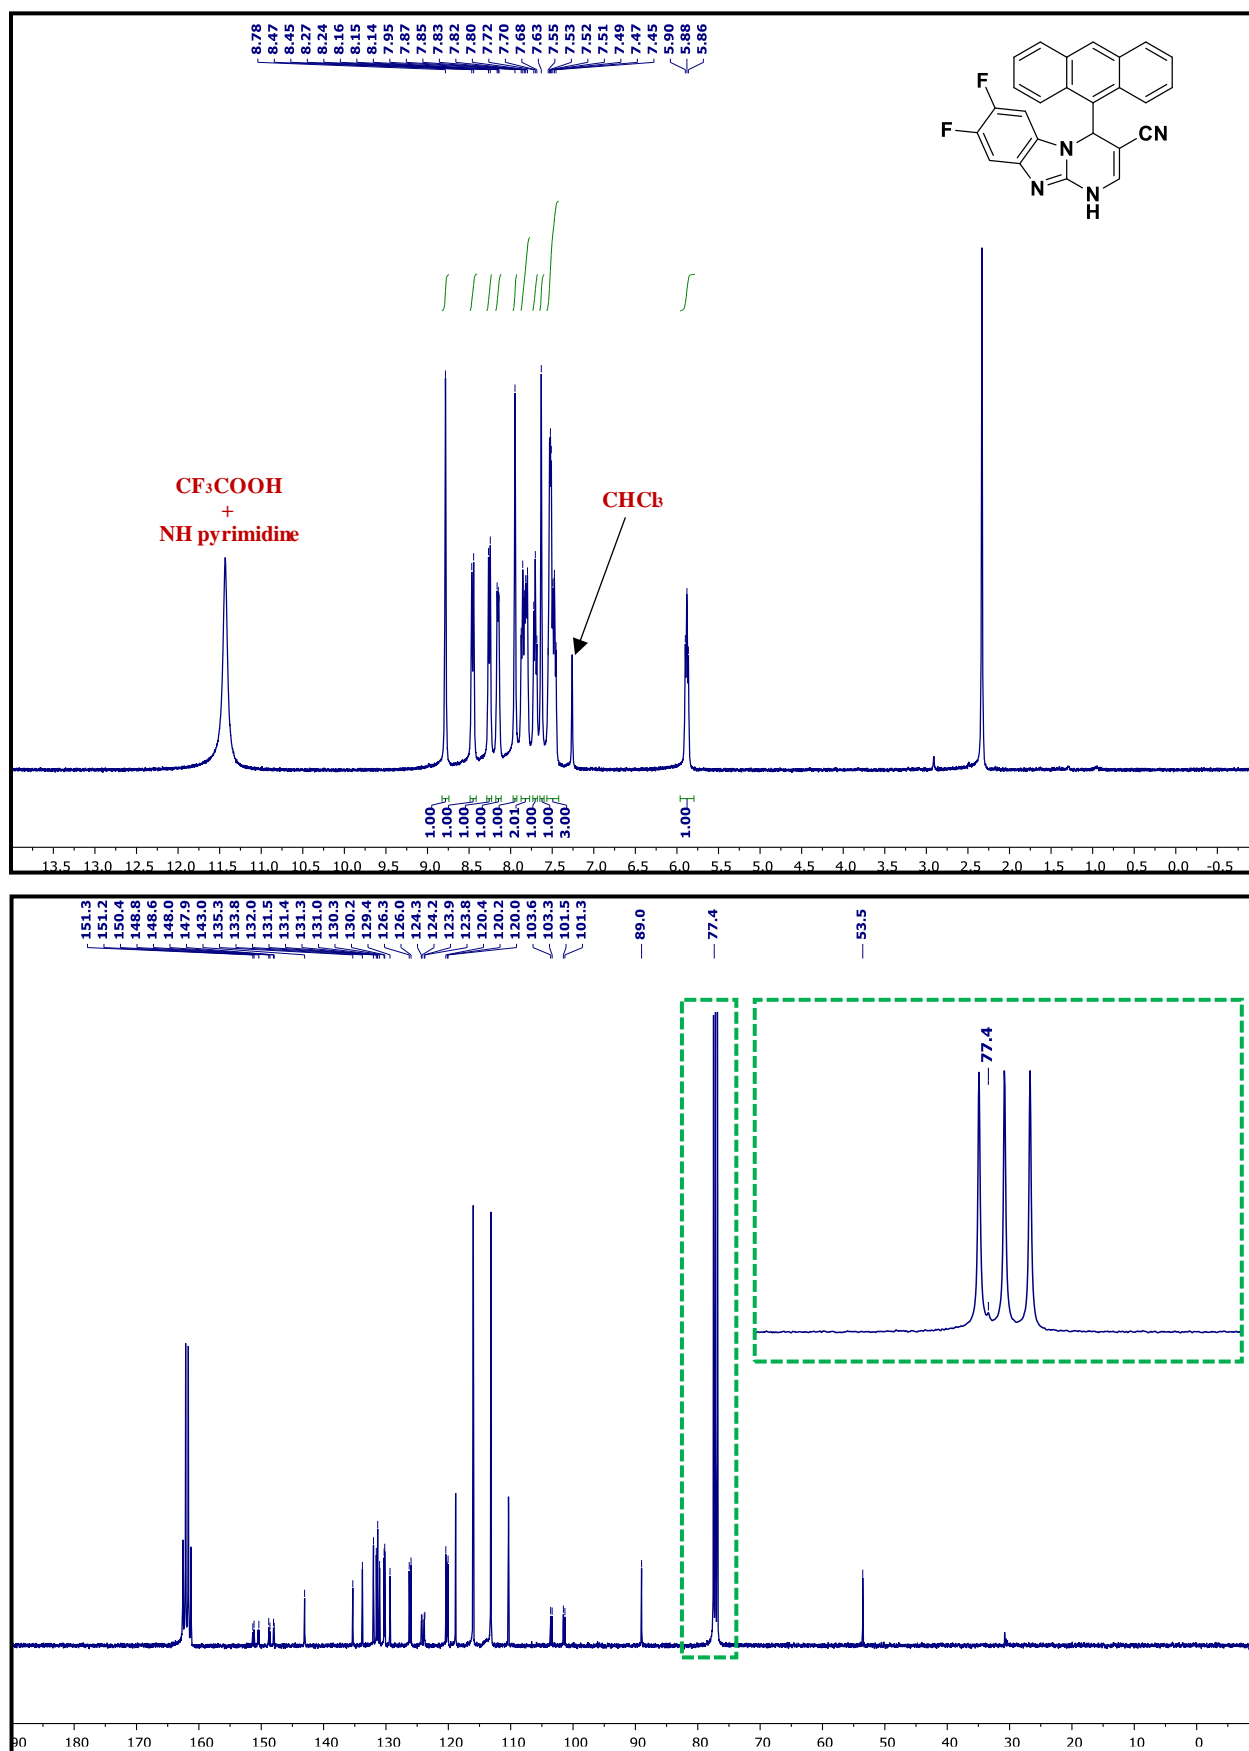

Figure S14. <sup>1</sup>H NMR (CDCl<sub>3</sub> + 0.1 ml CF<sub>3</sub>COOD) and <sup>13</sup>C NMR (100 MHz, CDCl<sub>3</sub> + 0.1 ml CF<sub>3</sub>COOD) spectra of **5f**

## 4-(4-(Dimethylamino)phenyl)benzo[4,5]imidazo[1,2-a]pyrimidine-3-carbonitrile (6a)

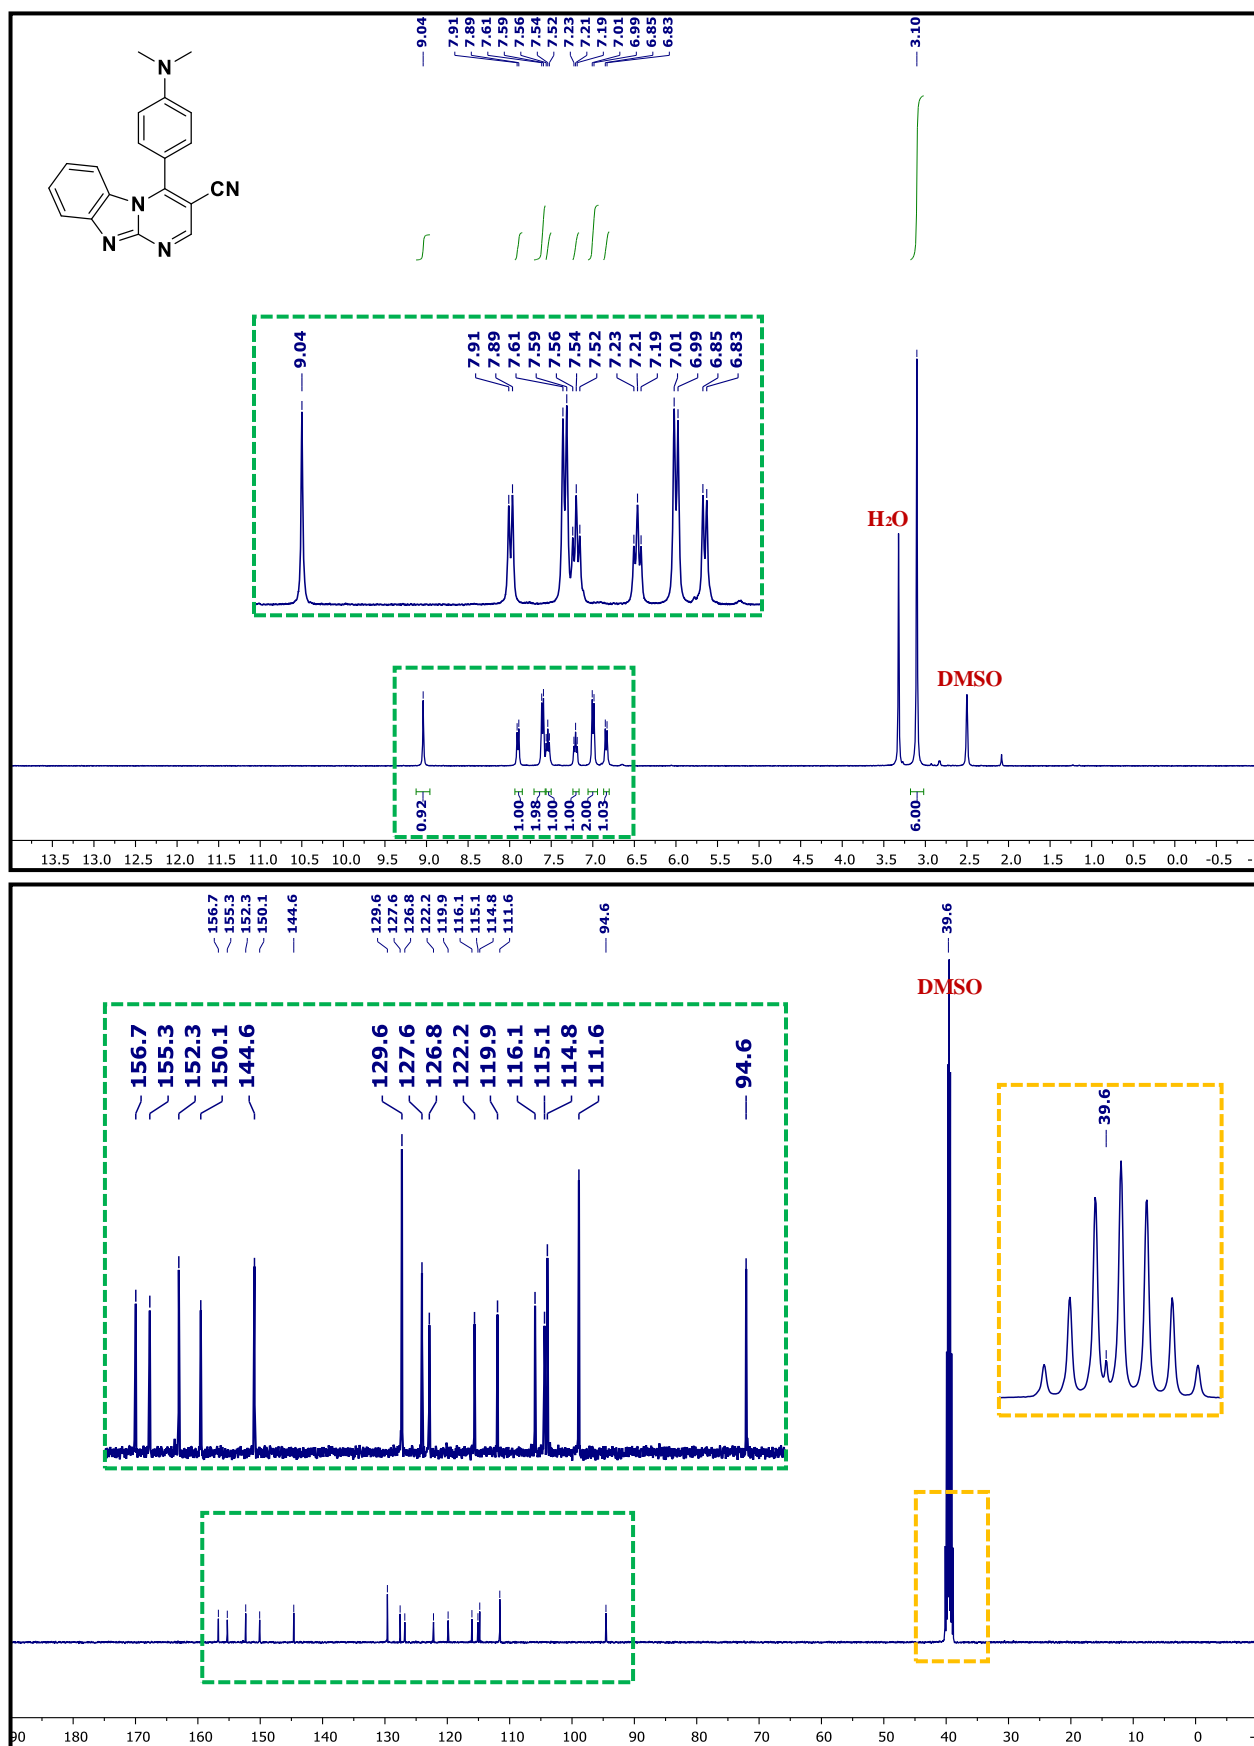Figure S15.  $^1\text{H}$  NMR (400 MHz,  $\text{DMSO}-d_6$ ) and  $^{13}\text{C}$  NMR (100 MHz,  $\text{DMSO}-d_6$ ) spectra of 6a

4-(4-Methoxyphenyl)benzo[4,5]imidazo[1,2-a]pyrimidine-3-carbonitrile (**6b**)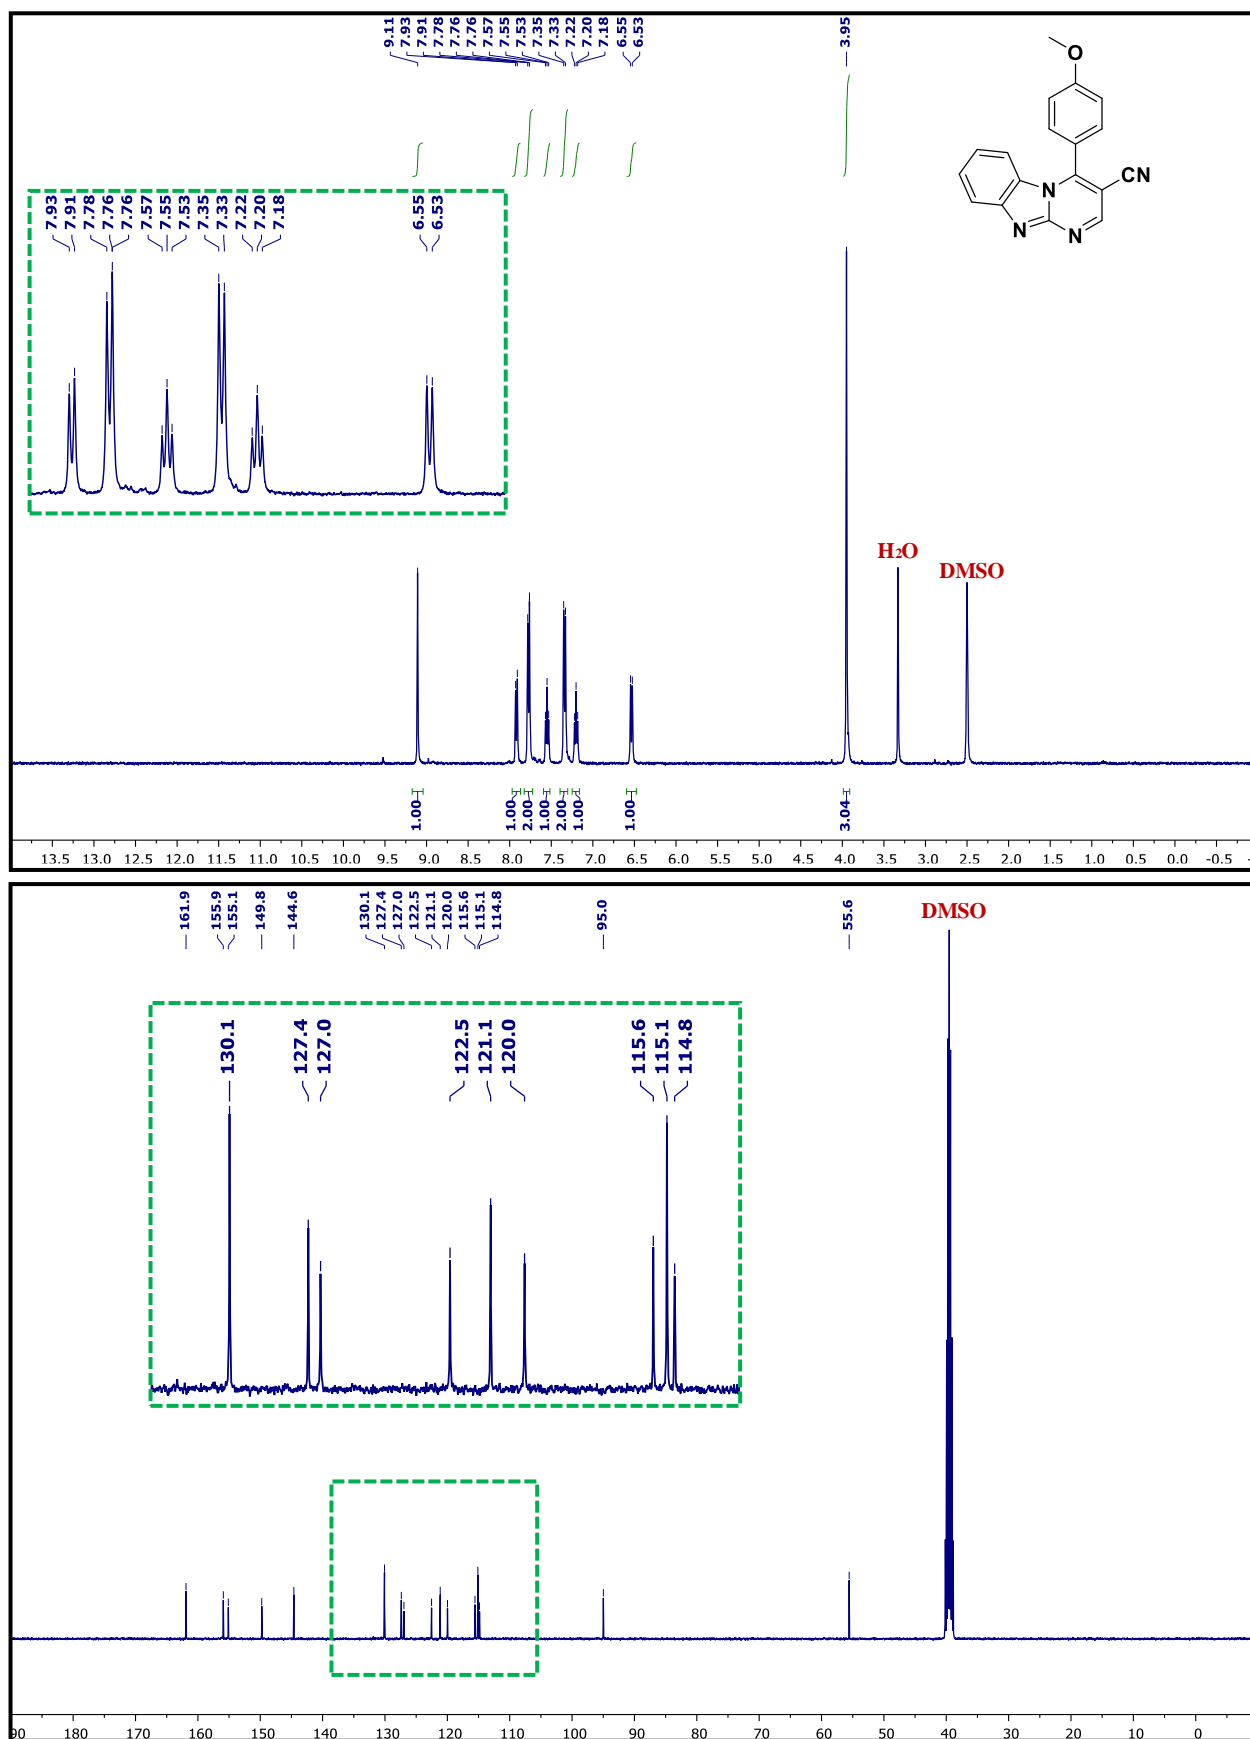Figure S16.  $^1\text{H}$  NMR (400 MHz,  $\text{DMSO}-d_6$ ) and  $^{13}\text{C}$  NMR (100 MHz,  $\text{DMSO}-d_6$ ) spectra of **6b**

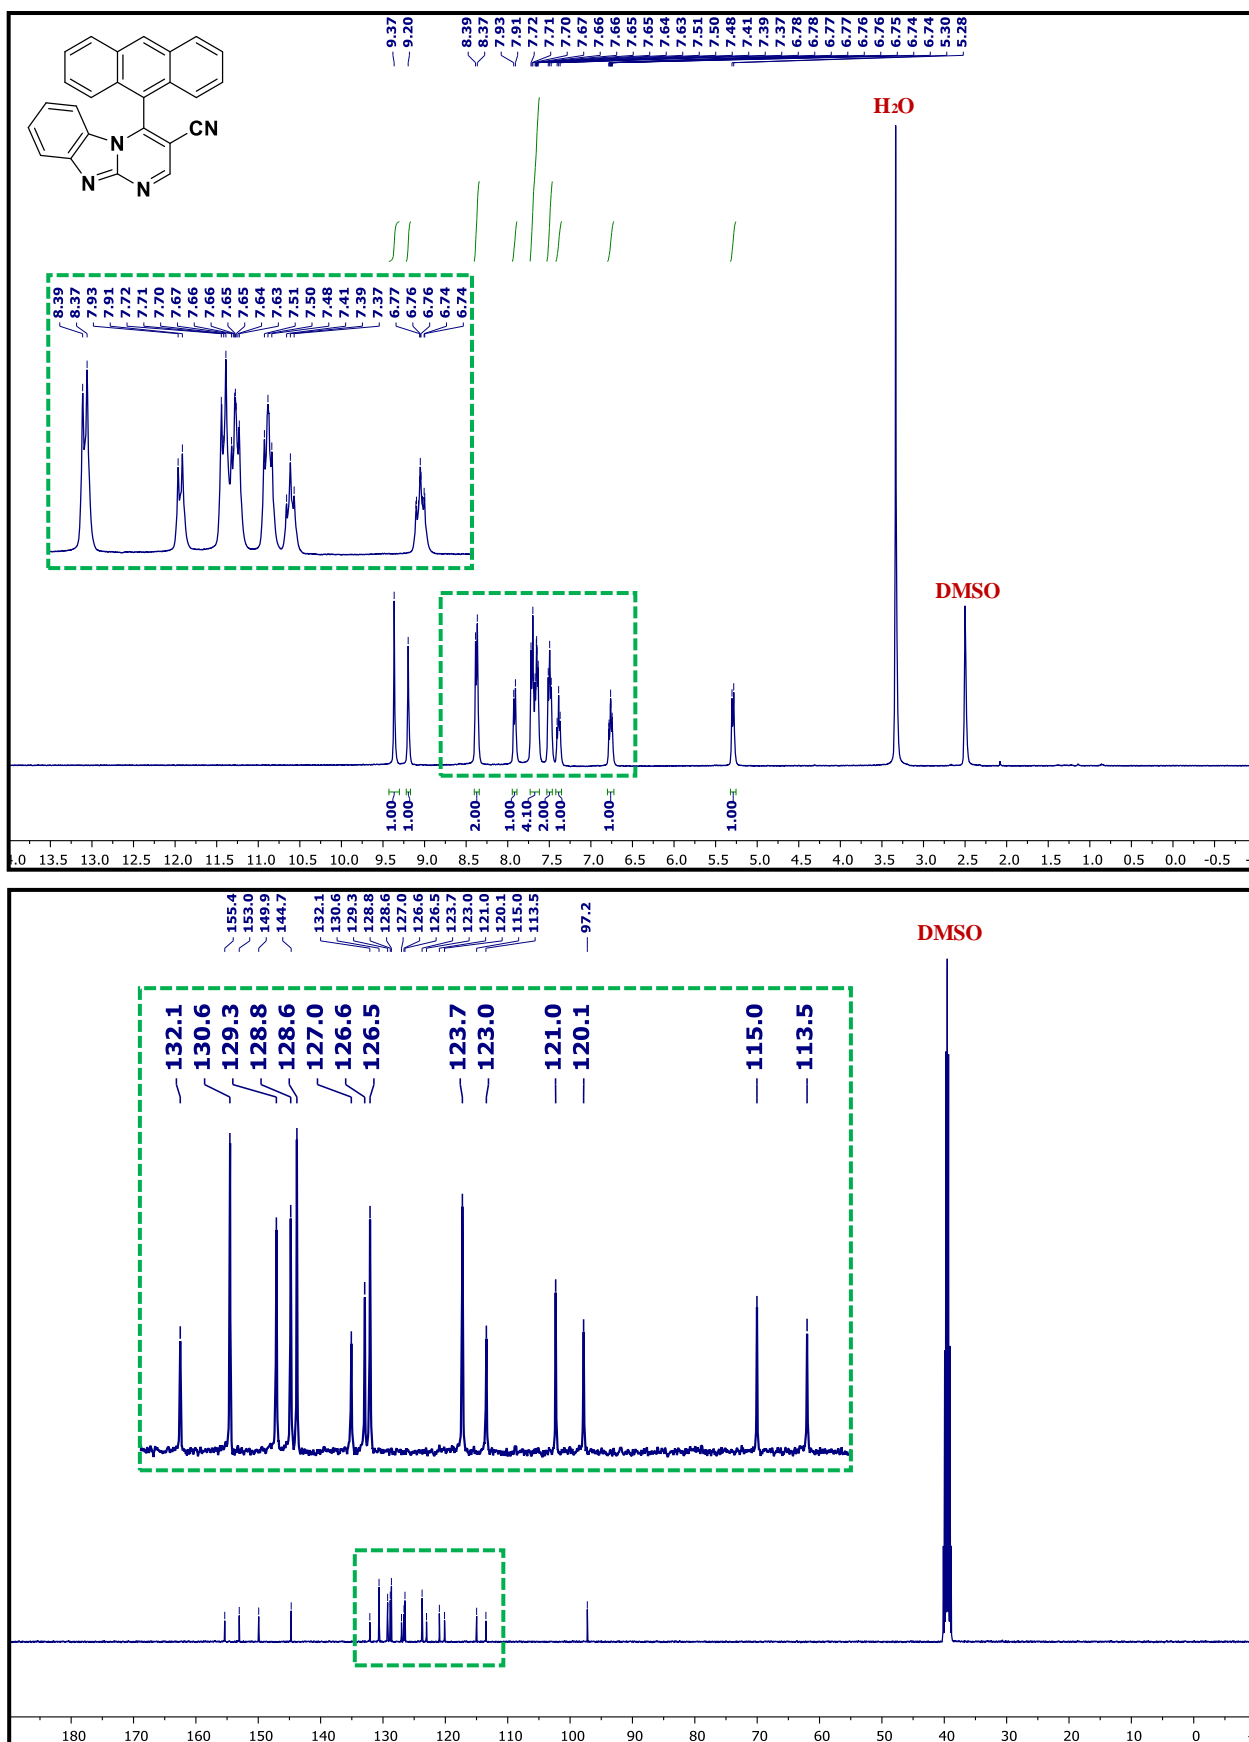

## 4-(4-(Dimethylamino)phenyl)-7,8-difluorobenzo[4,5]imidazo[1,2-a]pyrimidine-3-carbonitrile (6d)

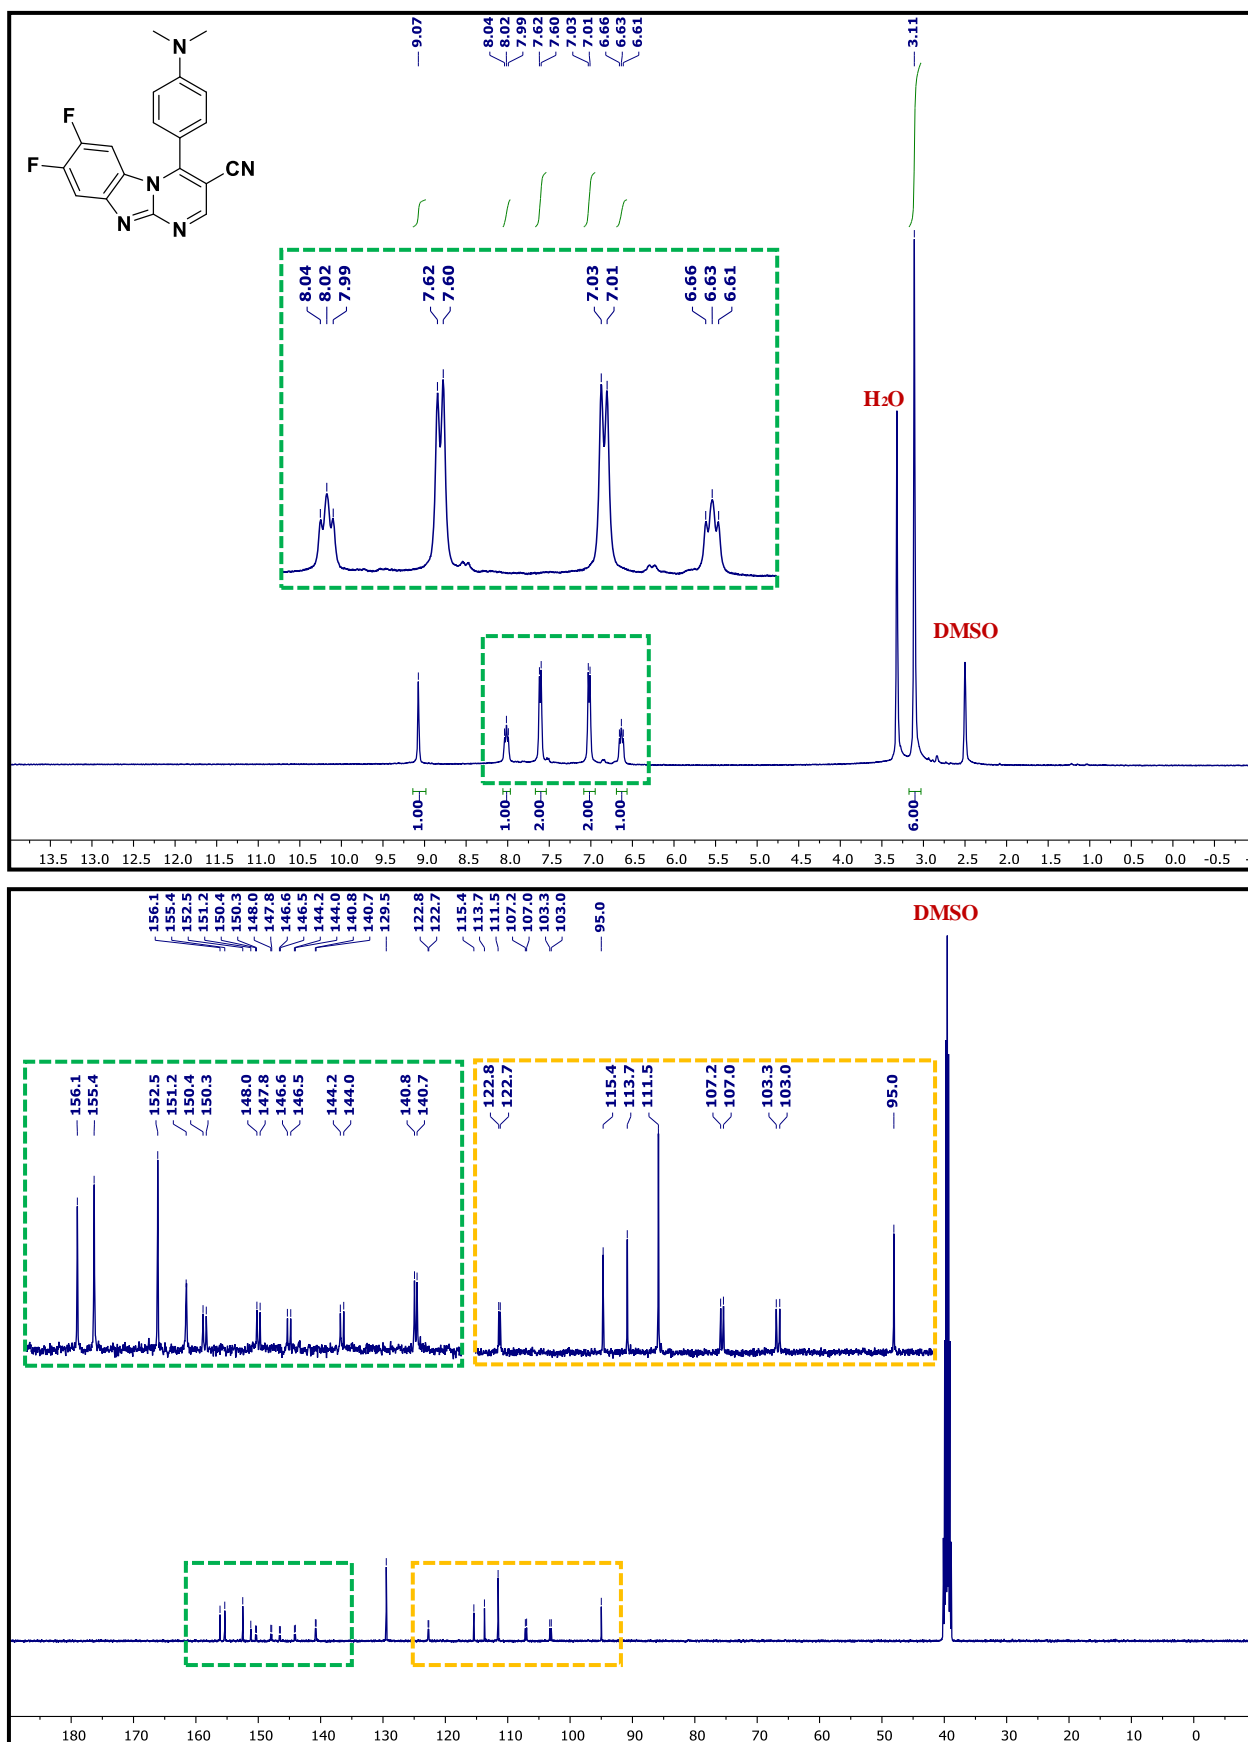Figure S18.  $^1\text{H}$  NMR (400 MHz,  $\text{DMSO}-d_6$ ) and  $^{13}\text{C}$  NMR (100 MHz,  $\text{DMSO}-d_6$ ) spectra of 6d

## 7,8-Difluoro-4-(4-methoxyphenyl)benzo[4,5]imidazo[1,2-a]pyrimidine-3-carbonitrile (6e)

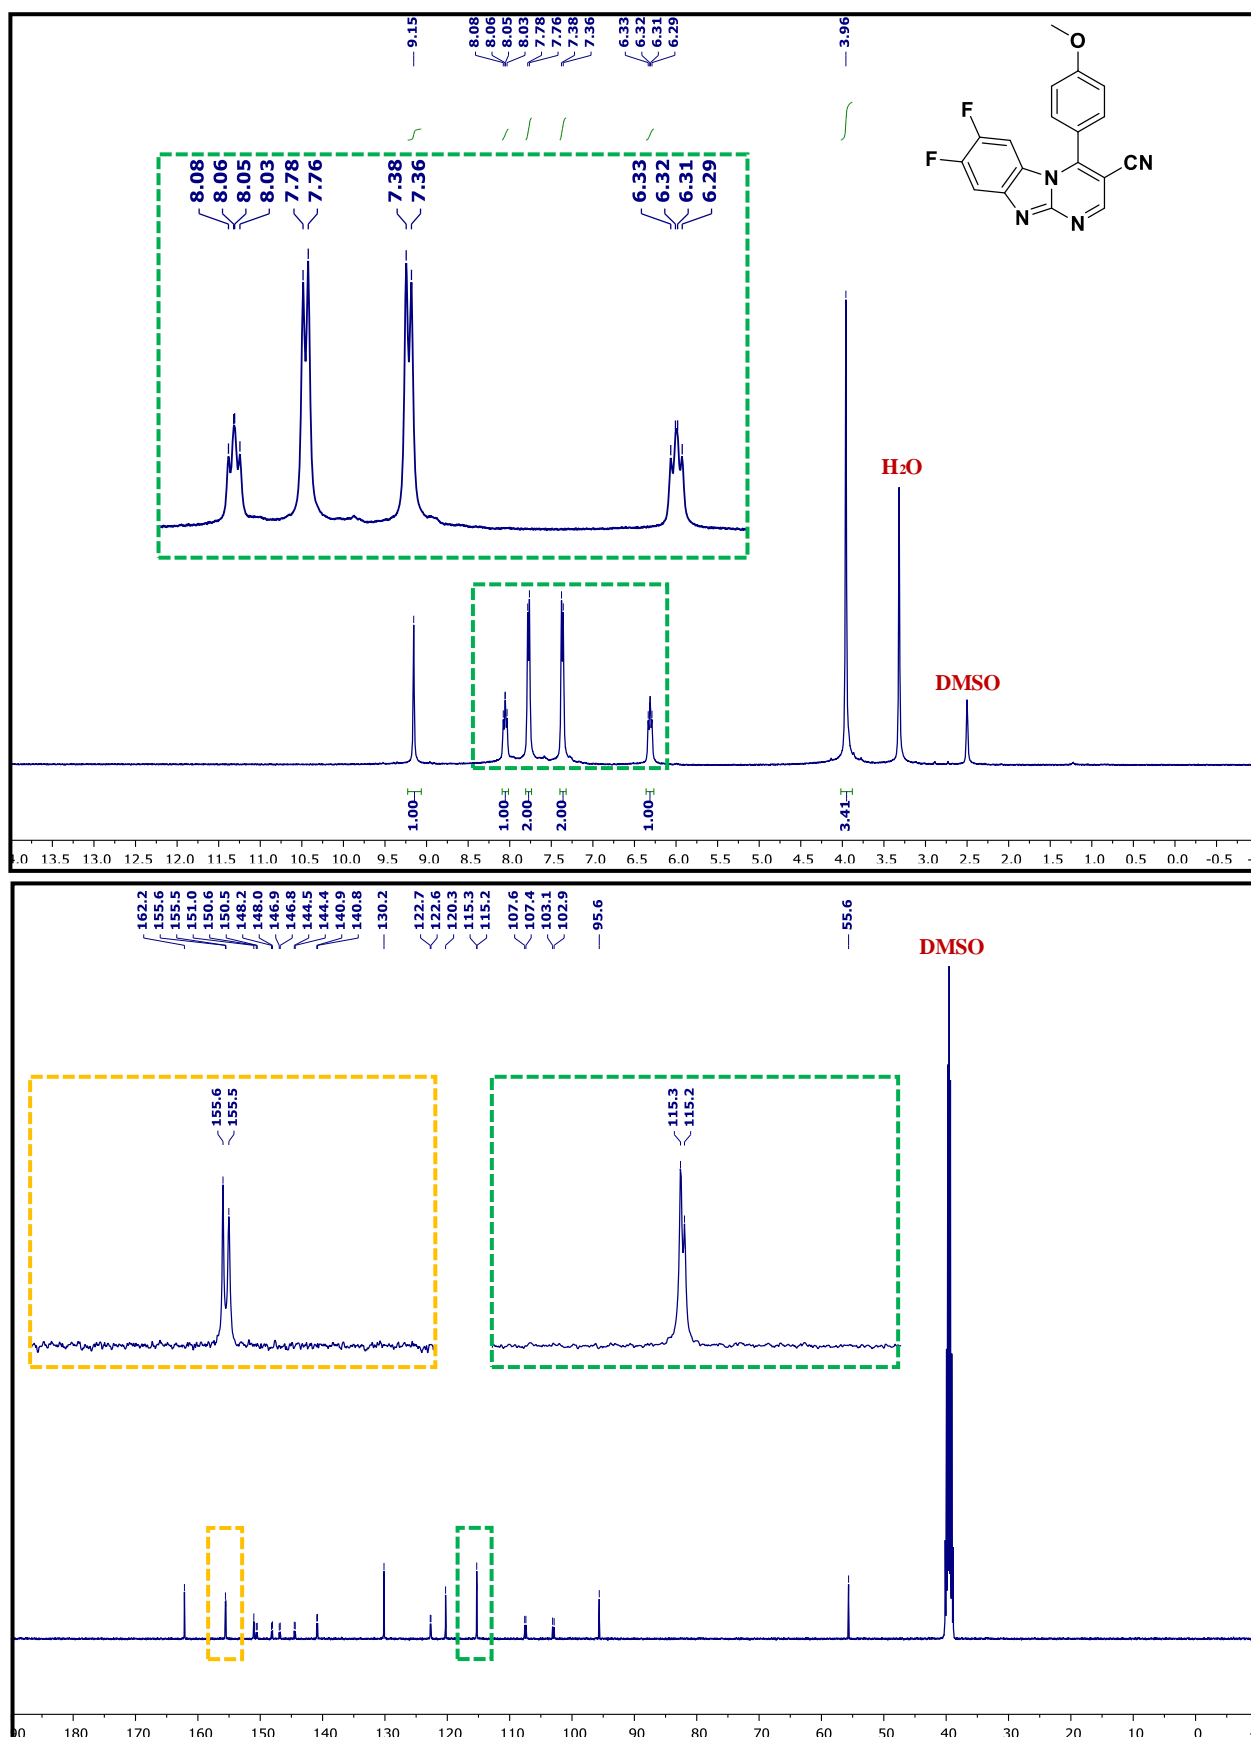Figure S19.  $^1\text{H}$  NMR (400 MHz,  $\text{DMSO}-d_6$ ) and  $^{13}\text{C}$  NMR (100 MHz,  $\text{DMSO}-d_6$ ) spectra of 6e

4-(Anthracen-9-yl)-7,8-difluorobenzo[4,5]imidazo[1,2-a]pyrimidine-3-carbonitrile (**6f**)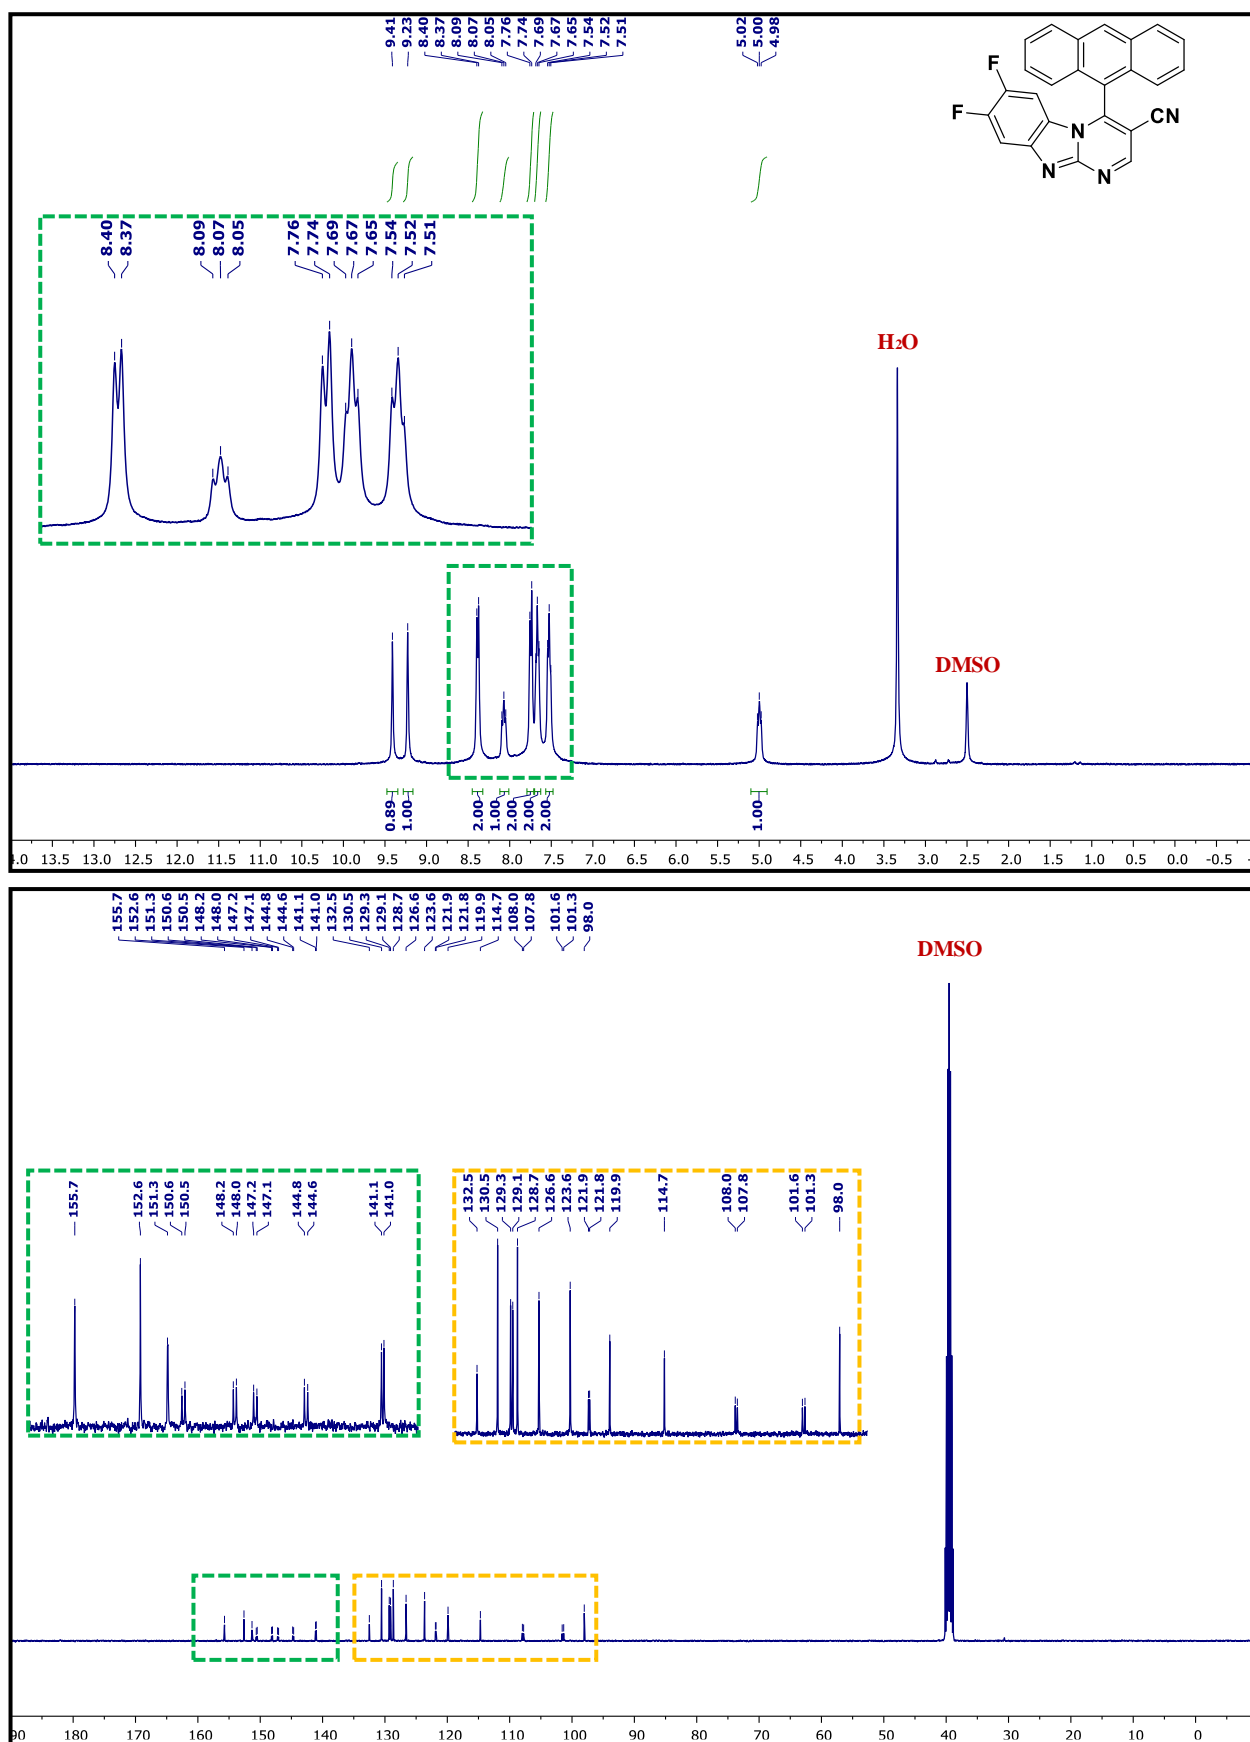Figure S20. <sup>1</sup>H NMR (400 MHz, DMSO-*d*<sub>6</sub>) and <sup>13</sup>C NMR (100 MHz, DMSO-*d*<sub>6</sub>) spectra of **6f**

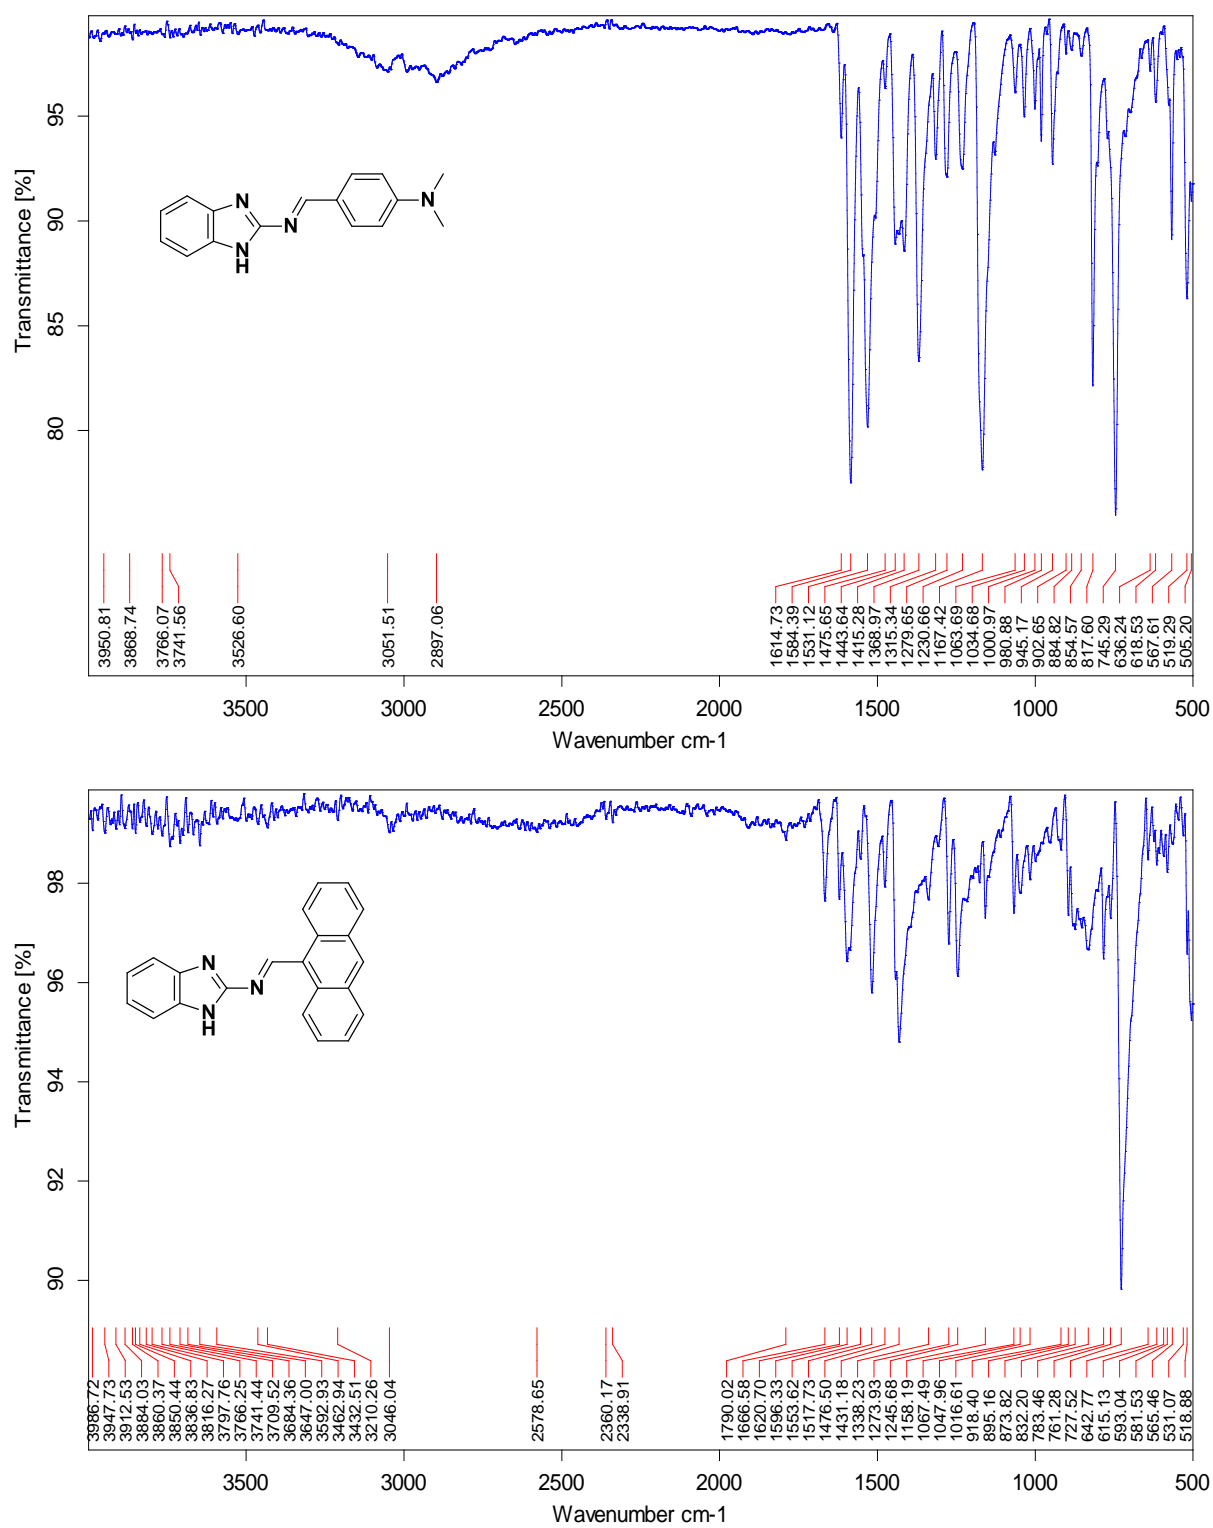

Figure S21. IR spectra of 3a and 3c



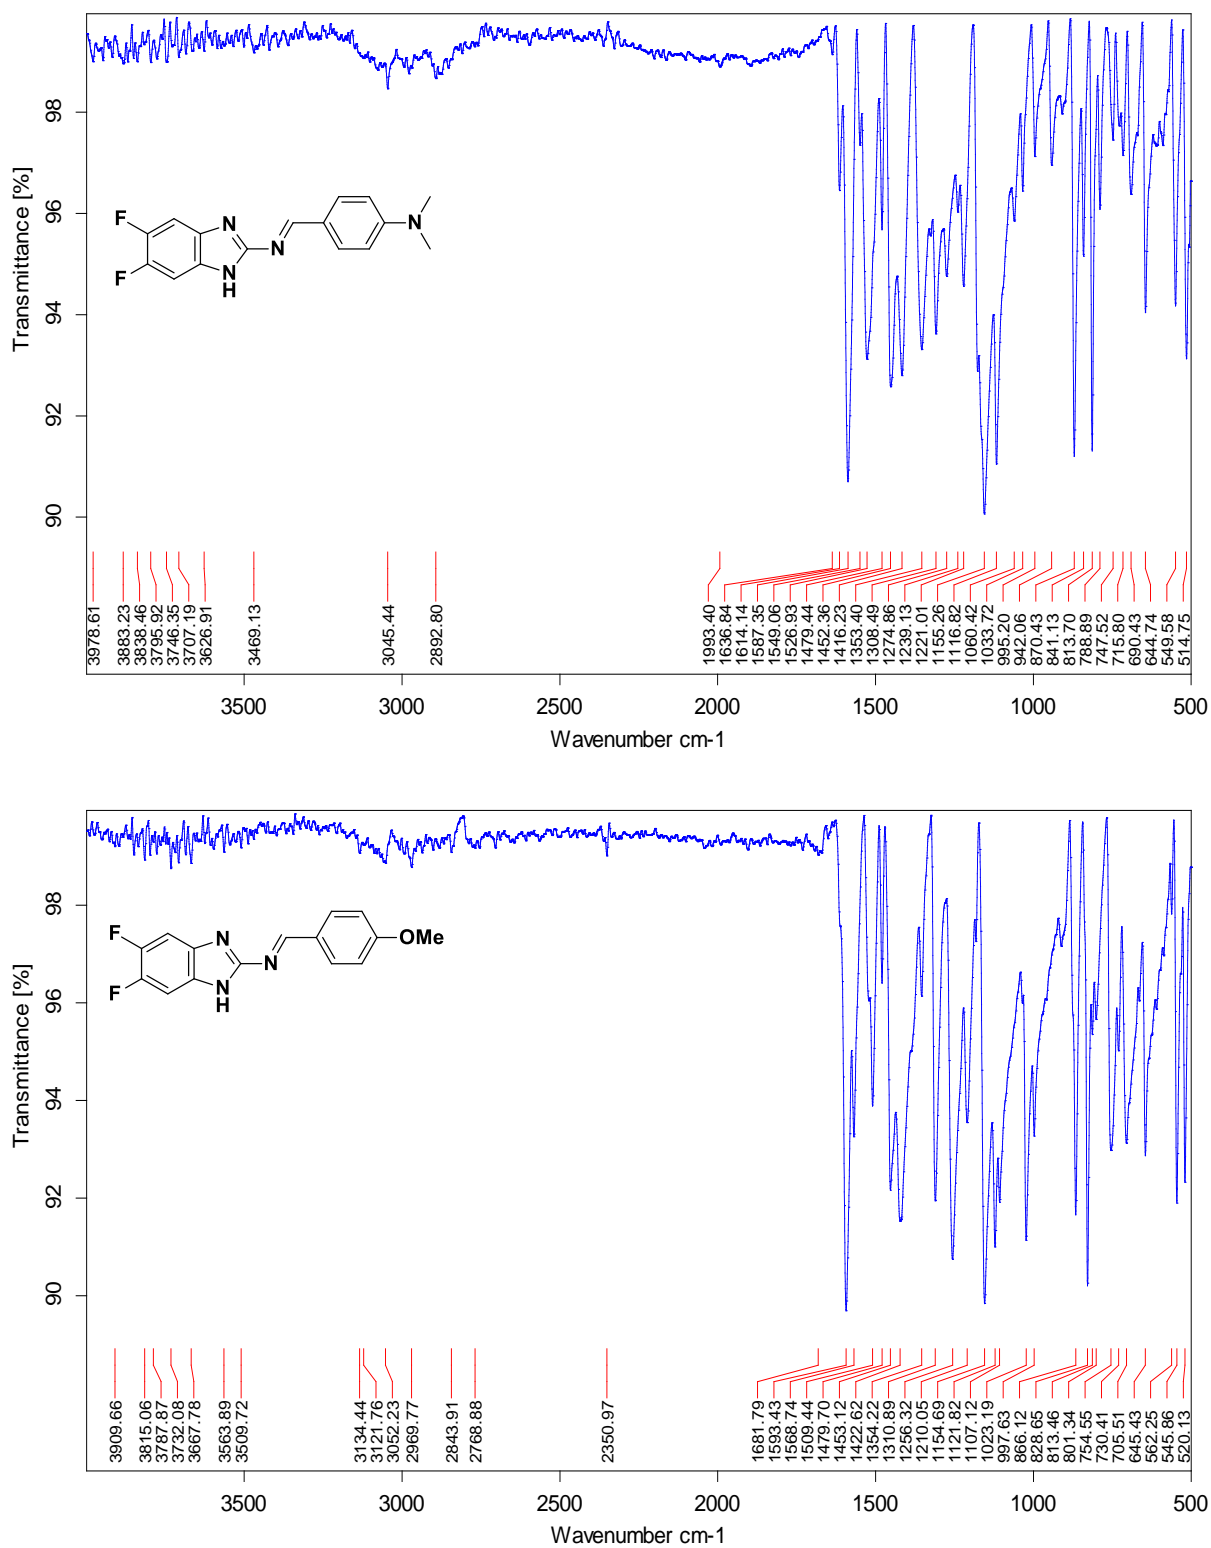

Figure S22. IR spectra of 3c and 3d

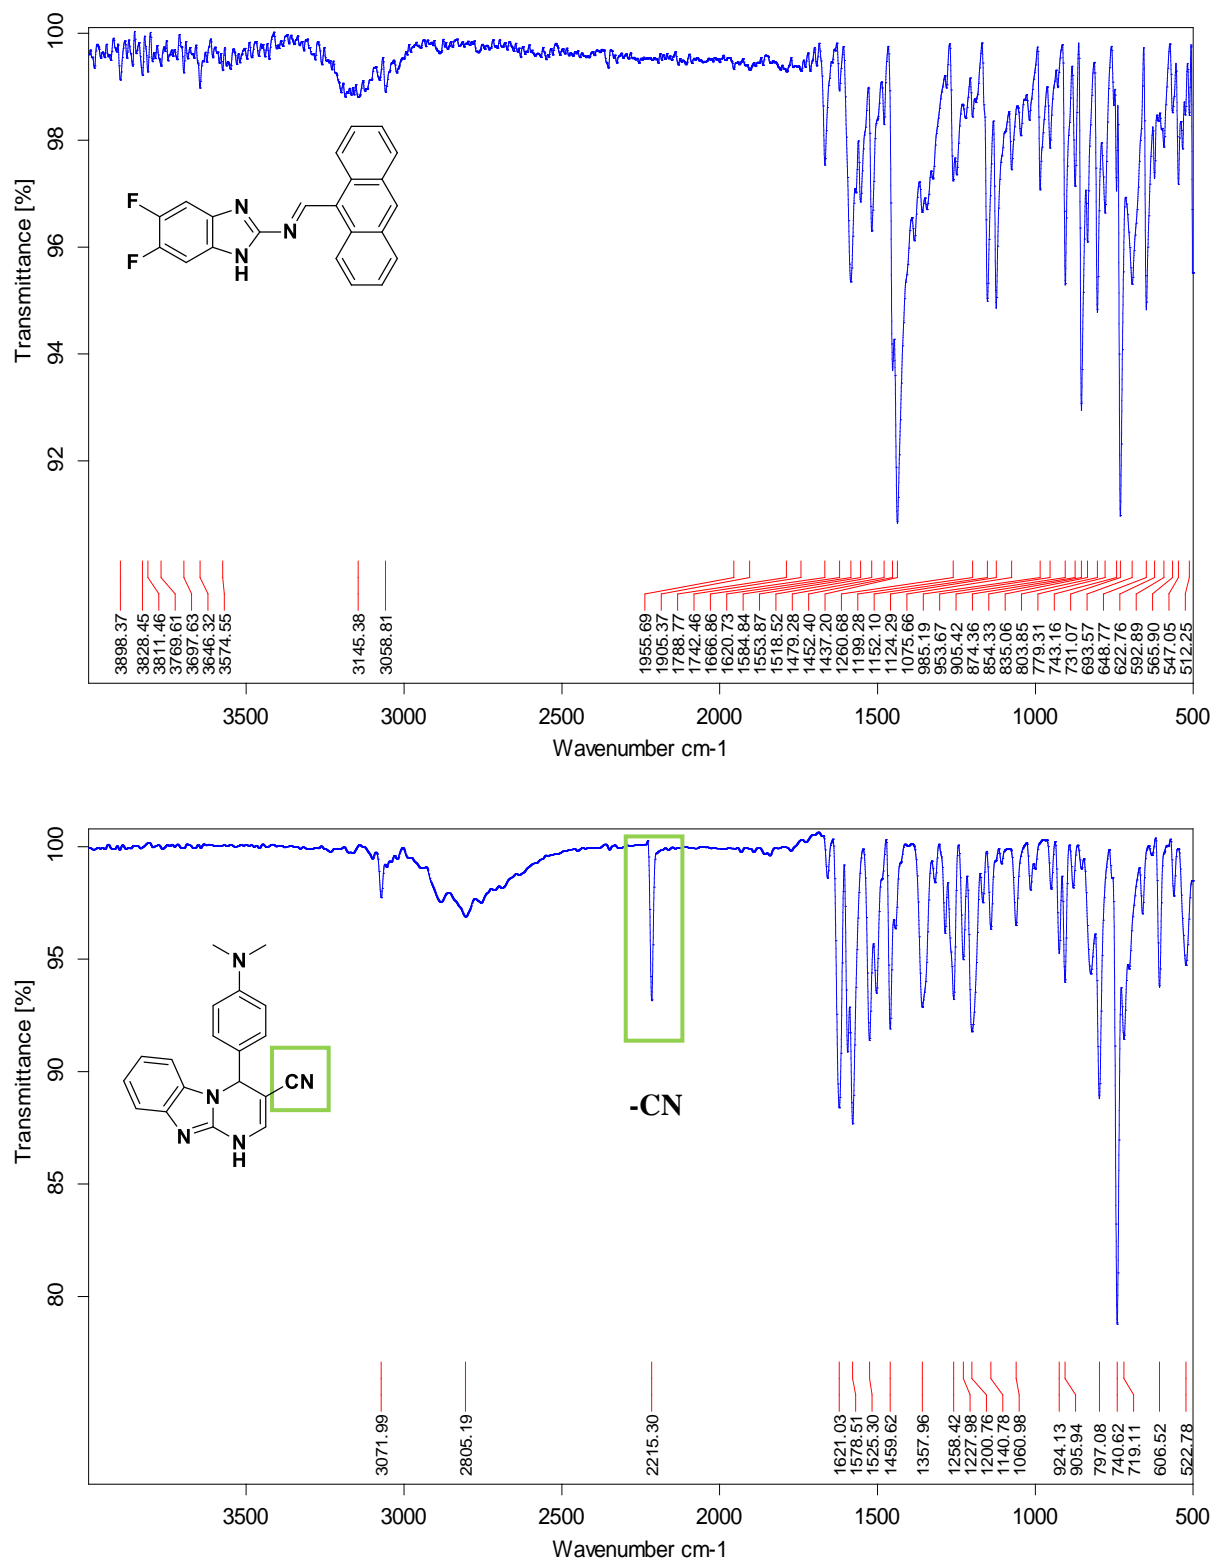

Figure S23. IR spectra of 3e and 5a

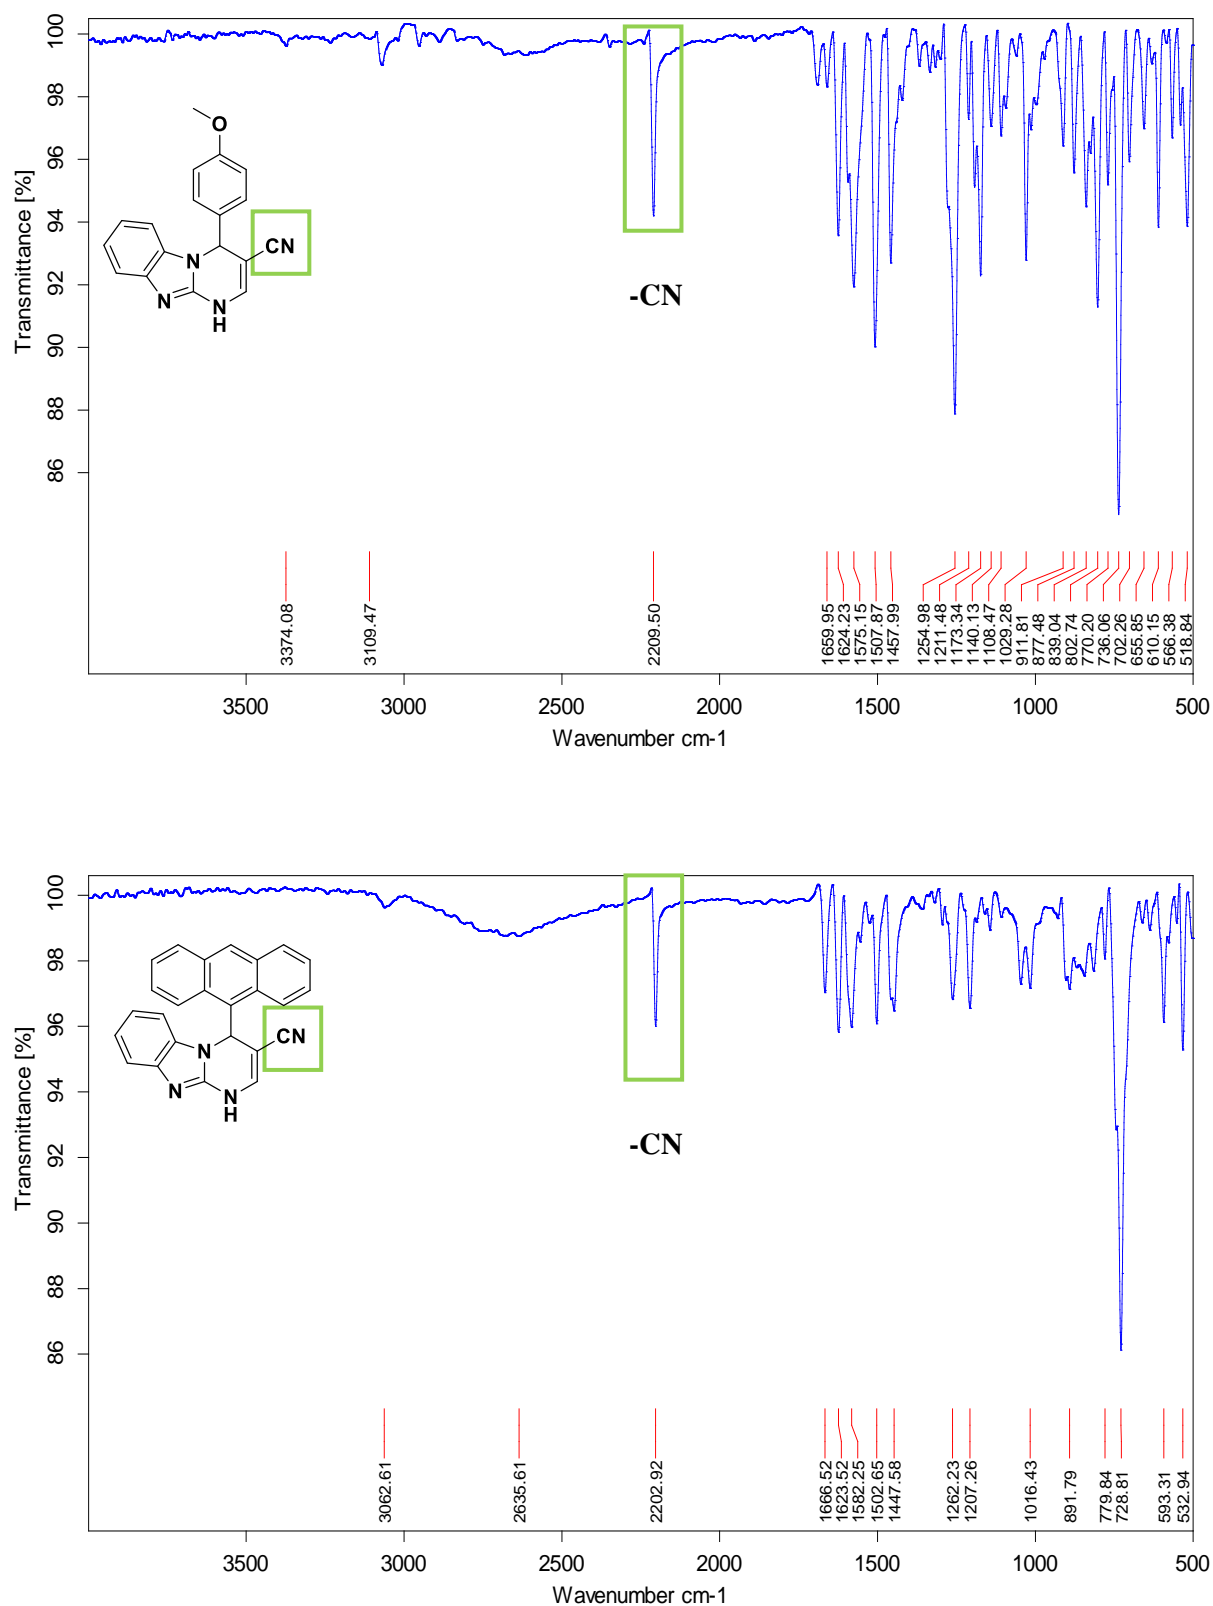Figure S24. IR spectra of **5b** and **5c**

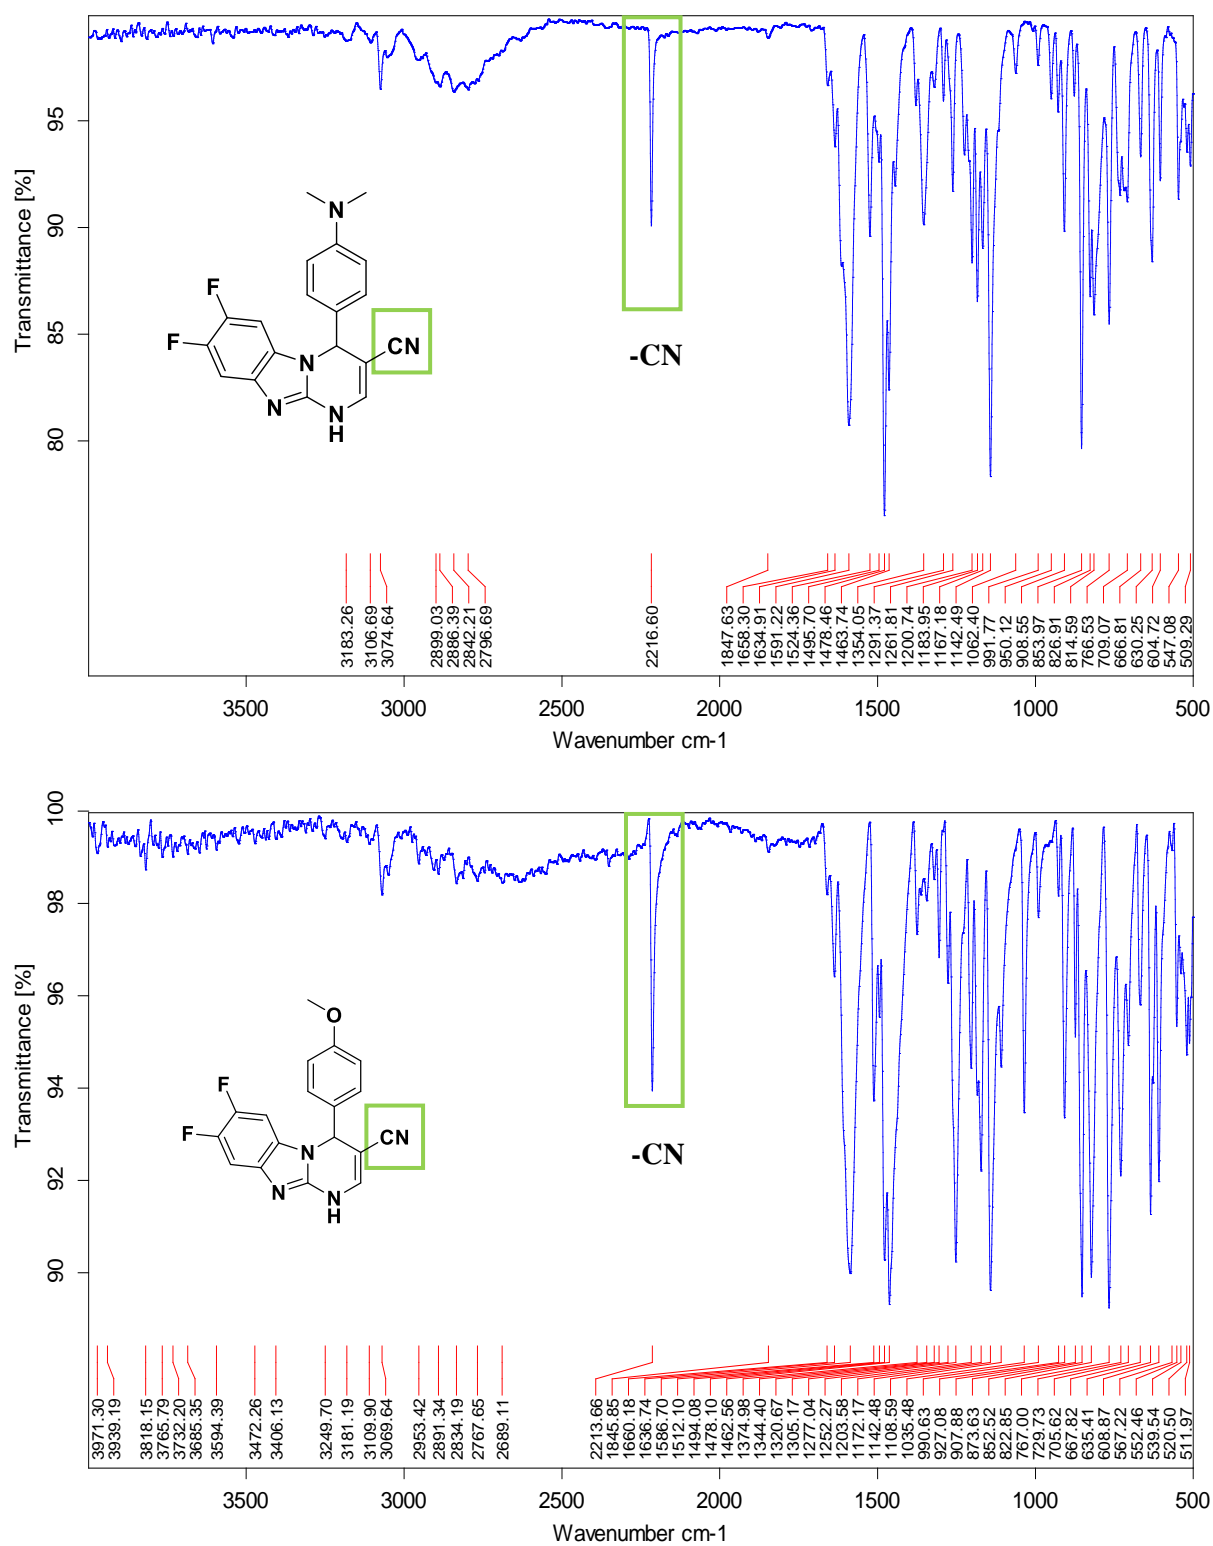

Figure S25. IR spectra of 5d and 5e

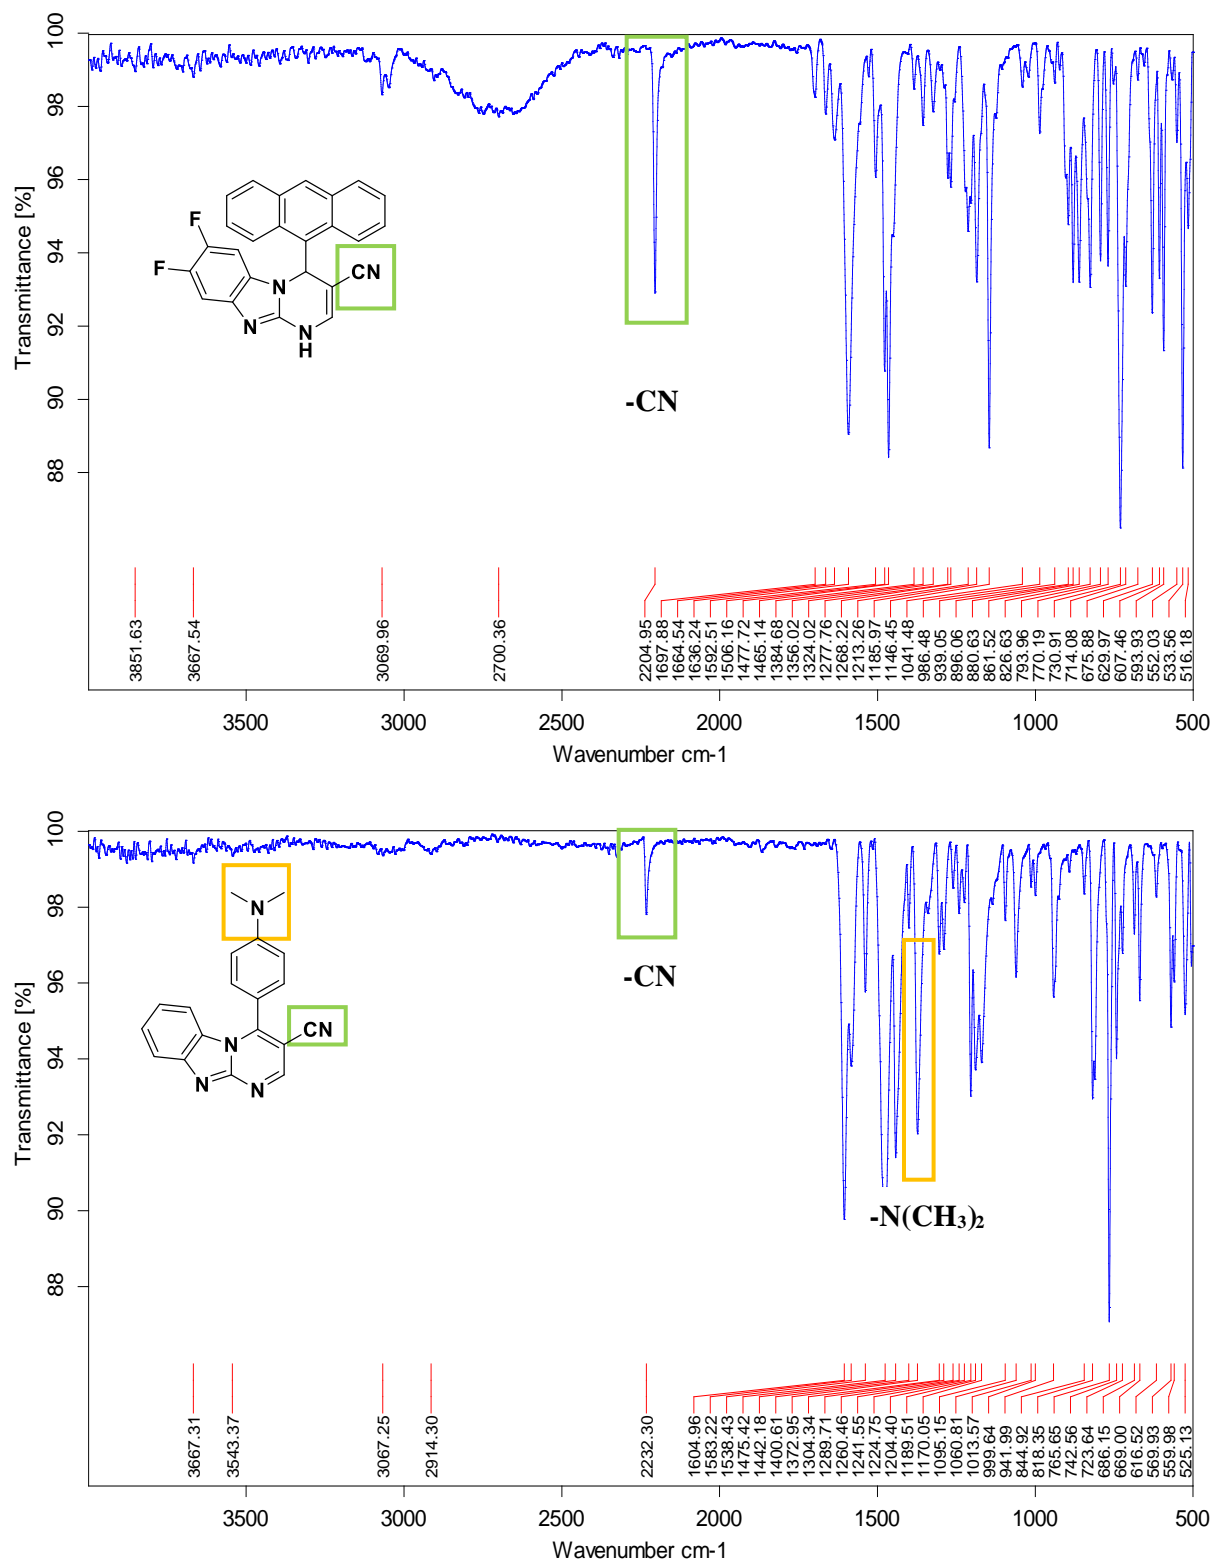

Figure S26. IR spectra of 5f and 6a

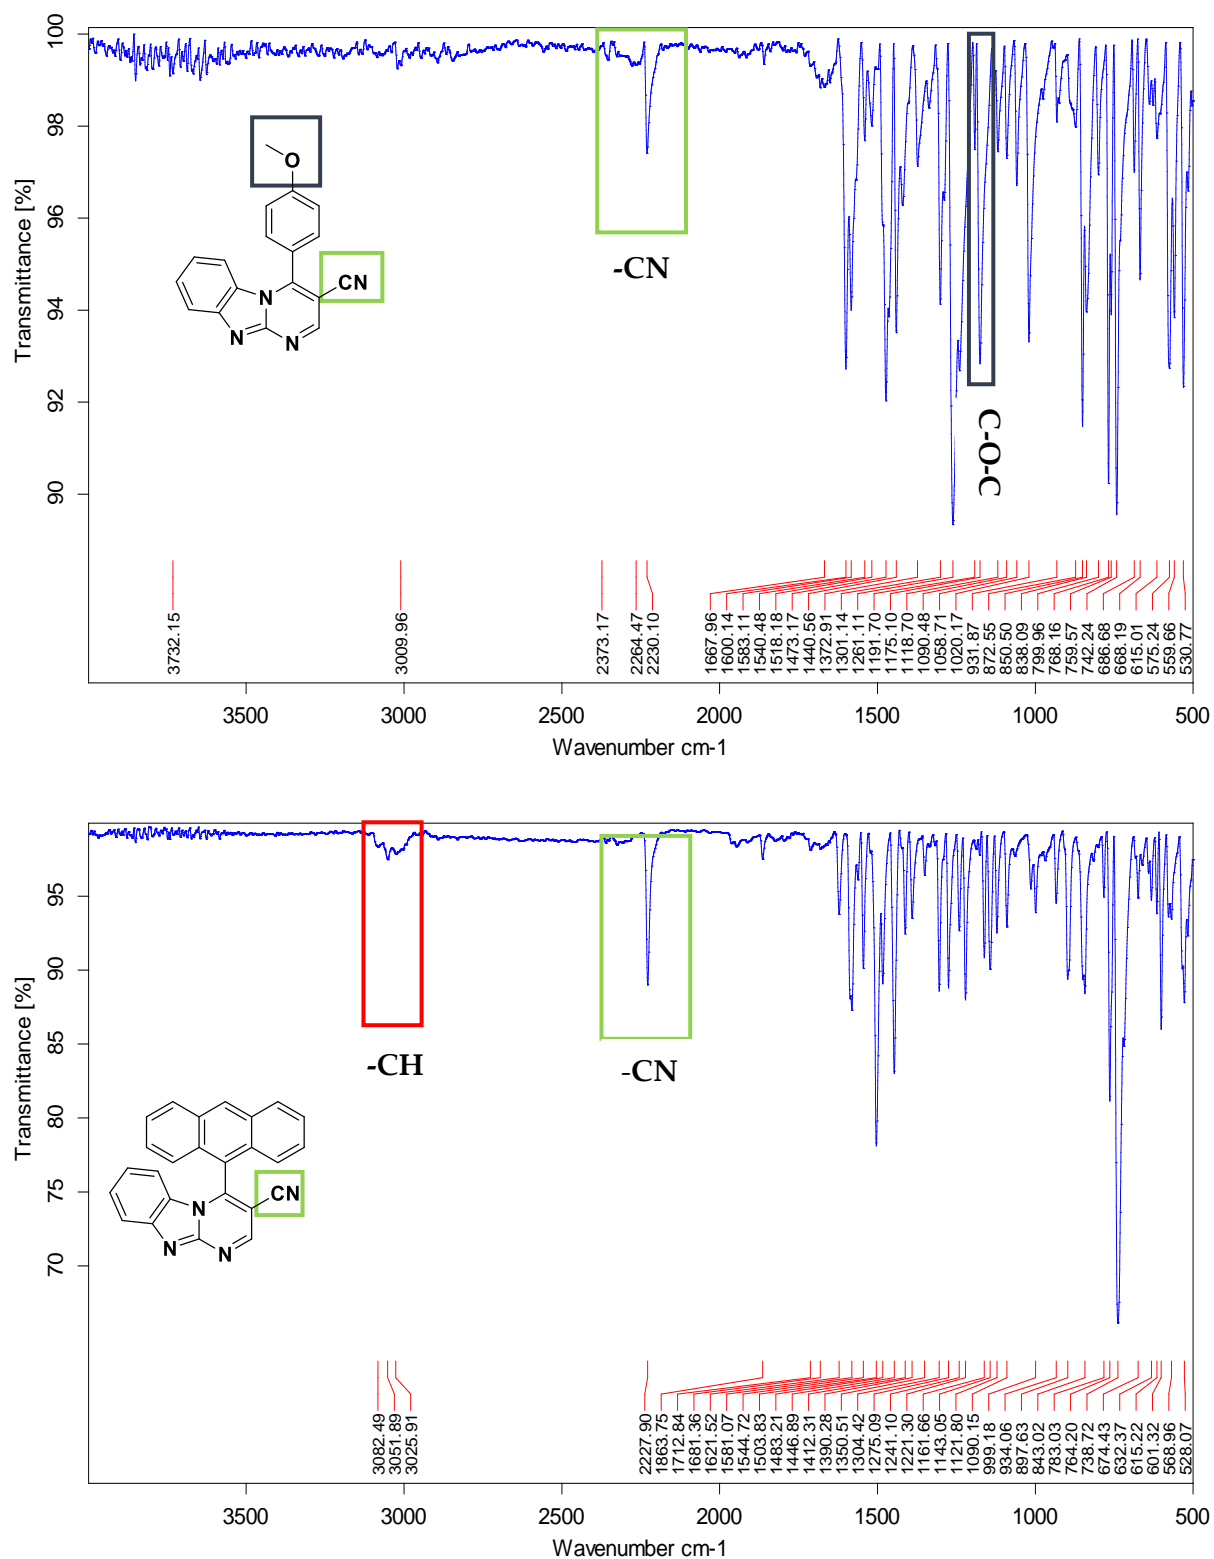Figure S27. IR spectra of **6b** and **6c**

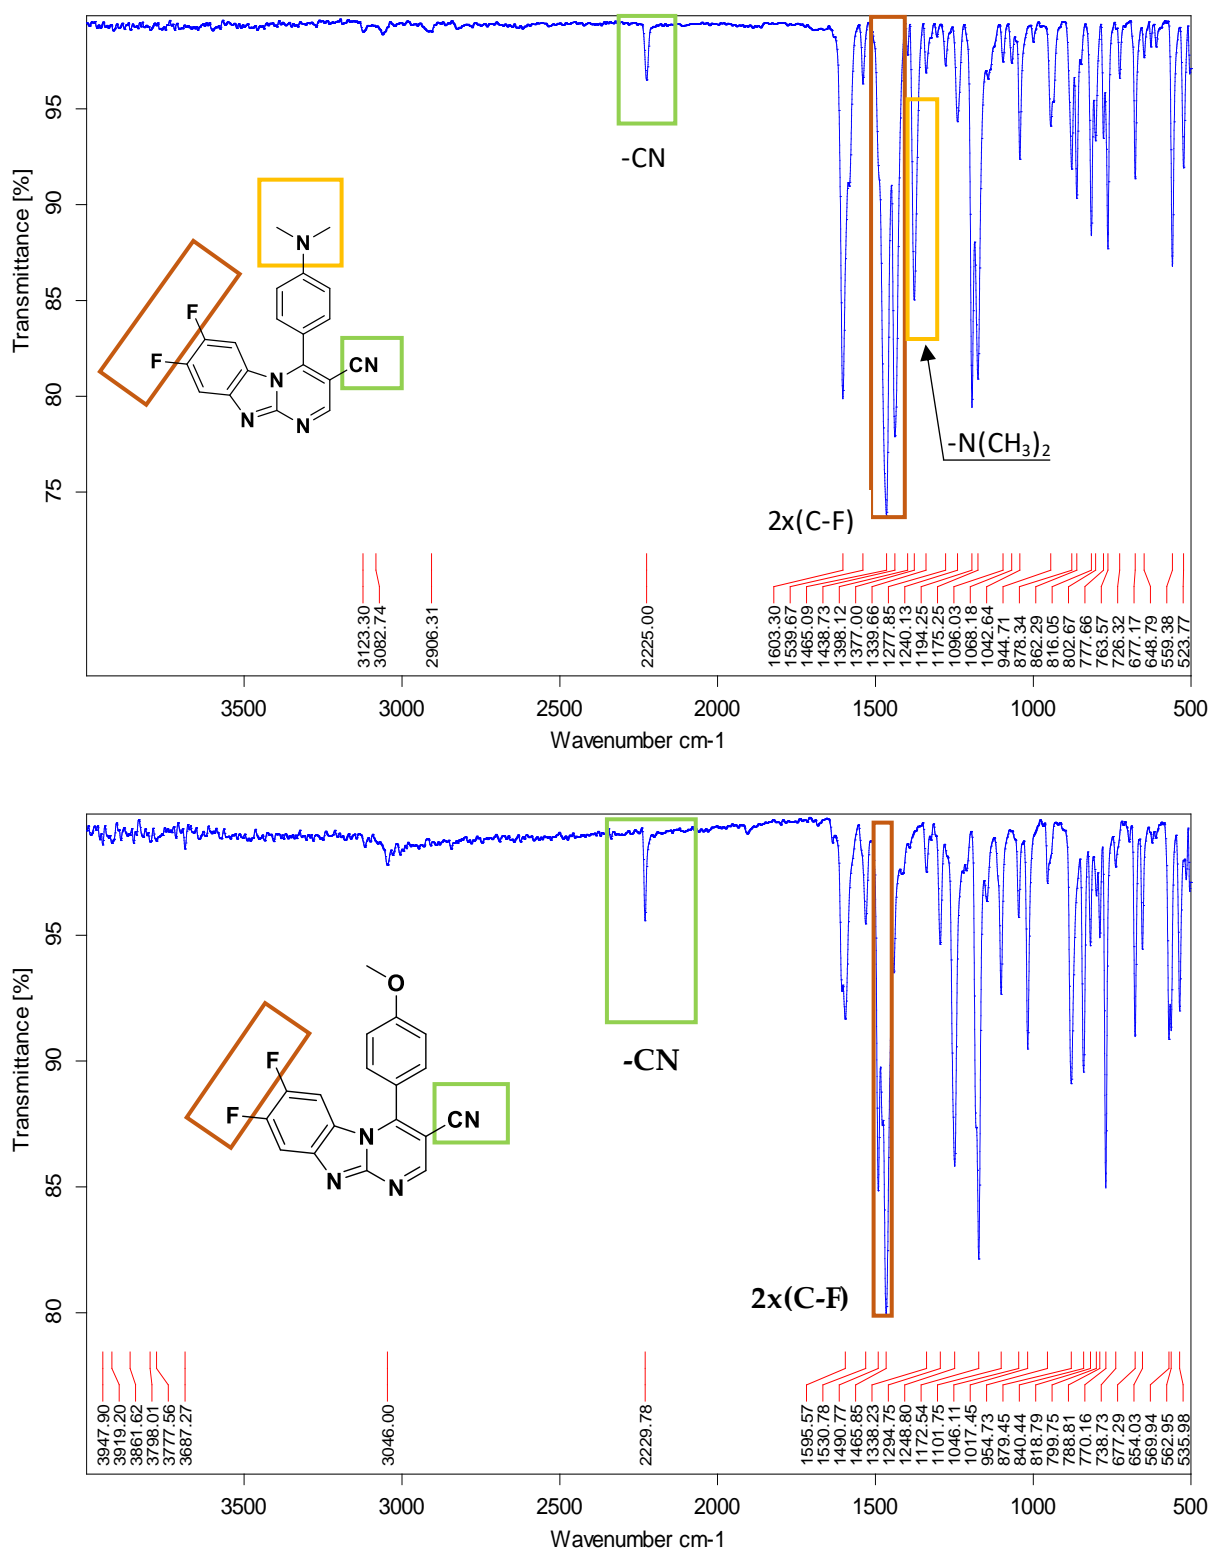

Figure S28. IR spectra of 6d and 6e

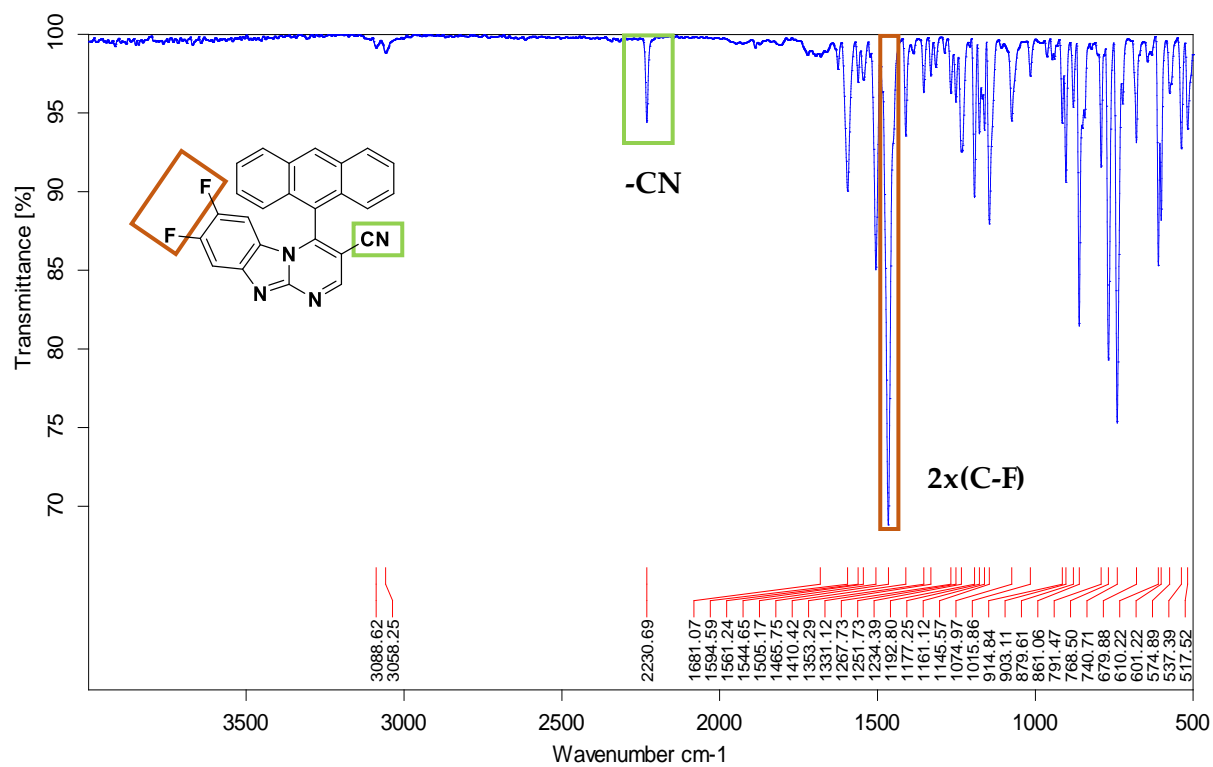

Figure S29. IR spectra of 6f



## 7. Crystallography

**Table S10.** Crystal data and structure refinement for **6c**.

|                                                |                                                                 |
|------------------------------------------------|-----------------------------------------------------------------|
| Identification code                            | exp_192                                                         |
| Empirical formula                              | C <sub>51</sub> H <sub>30</sub> Cl <sub>2</sub> N <sub>8</sub>  |
| Formula weight                                 | 825.73                                                          |
| Temperature/K                                  | 295(2)                                                          |
| Crystal system                                 | triclinic                                                       |
| Space group                                    | P-1                                                             |
| a/Å                                            | 8.5135(4)                                                       |
| b/Å                                            | 10.4646(5)                                                      |
| c/Å                                            | 22.9053(12)                                                     |
| $\alpha/^\circ$                                | 88.784(4)                                                       |
| $\beta/^\circ$                                 | 85.741(4)                                                       |
| $\gamma/^\circ$                                | 82.301(4)                                                       |
| Volume/Å <sup>3</sup>                          | 2016.53(17)                                                     |
| Z                                              | 2                                                               |
| $\rho_{\text{calc}}/\text{g/cm}^3$             | 1.360                                                           |
| $\mu/\text{mm}^{-1}$                           | 0.210                                                           |
| F(000)                                         | 852.0                                                           |
| Crystal size/mm <sup>3</sup>                   | 0.48 × 0.32 × 0.19                                              |
| Radiation                                      | MoK $\alpha$ ( $\lambda$ = 0.71073)                             |
| 2 $\Theta$ range for data collection/ $^\circ$ | 7.384 to 60.982                                                 |
| Index ranges                                   | -10 ≤ h ≤ 11, -14 ≤ k ≤ 13, -31 ≤ l ≤ 29                        |
| Reflections collected                          | 20634                                                           |
| Independent reflections                        | 10876 [ $R_{\text{int}}$ = 0.0577, $R_{\text{sigma}}$ = 0.0845] |
| Data/restraints/parameters                     | 10876/14/571                                                    |
| Goodness-of-fit on F <sup>2</sup>              | 1.003                                                           |
| Final R indexes [ $I \geq 2\sigma(I)$ ]        | $R_1$ = 0.0767, $wR_2$ = 0.1916                                 |
| Final R indexes [all data]                     | $R_1$ = 0.1463, $wR_2$ = 0.2616                                 |
| Largest diff. peak/hole / e Å <sup>-3</sup>    | 0.34/-0.35                                                      |

**Table S11.** Fractional Atomic Coordinates ( $\times 10^4$ ) and Equivalent Isotropic Displacement Parameters ( $\text{\AA}^2 \times 10^3$ ) for **6c**

$U_{\text{eq}}$  is defined as 1/3 of the trace of the orthogonalised  $U_{ij}$  tensor.

| Atom | <i>x</i>  | <i>y</i>   | <i>z</i>   | $U(\text{eq})$ |
|------|-----------|------------|------------|----------------|
| Cl1  | -68.3(17) | 7778.6(15) | 1999.3(6)  | 140.6(5)       |
| Cl   | 2318(3)   | 8769(3)    | 1246.8(12) | 205.3(14)      |
| N11A | 2874(2)   | 1028.5(18) | 3662.2(9)  | 47.8(5)        |

| Atom | <i>x</i> | <i>y</i> | <i>z</i>   | U(eq)   |
|------|----------|----------|------------|---------|
| N11  | 8740(2)  | 5344(2)  | 816.1(9)   | 51.7(5) |
| N1A  | 1501(3)  | -758(2)  | 3423.8(11) | 63.6(6) |
| N9A  | 4110(3)  | -512(2)  | 3043.8(10) | 62.9(6) |
| N1   | 11586(3) | 5442(3)  | 761.5(11)  | 66.8(7) |
| C4A  | 1658(3)  | 1537(2)  | 4046.1(10) | 44.1(5) |
| C25A | 1194(3)  | 3926(2)  | 4069.4(11) | 45.1(5) |
| N9   | 9771(3)  | 6858(2)  | 233.6(11)  | 67.3(7) |
| C26A | 1795(3)  | 2763(2)  | 4338.7(11) | 44.3(5) |
| C27A | 2603(3)  | 2725(2)  | 4852.1(11) | 47.9(6) |
| N2A  | -1936(4) | 1566(3)  | 4875.5(14) | 84.9(8) |
| C24A | 381(3)   | 3985(2)  | 3550.2(12) | 52.3(6) |
| C1A  | -906(3)  | 1288(2)  | 4532.5(13) | 57.0(7) |
| C3A  | 381(3)   | 871(2)   | 4117.3(12) | 50.7(6) |
| C25  | 6368(3)  | 4604(3)  | 1875.3(11) | 49.6(6) |
| C26  | 7398(3)  | 3853(2)  | 1477.2(11) | 48.1(6) |
| C12A | 4357(3)  | 1383(2)  | 3501.7(11) | 51.2(6) |
| C4   | 8839(3)  | 4363(3)  | 1219.3(11) | 51.9(6) |
| C10A | 2813(3)  | -141(2)  | 3363.7(11) | 53.5(6) |
| C2A  | 349(4)   | -266(3)  | 3790.7(14) | 61.2(7) |
| C20A | 1466(3)  | 5112(2)  | 4323.0(12) | 52.2(6) |
| C3   | 10341(3) | 3936(3)  | 1390.0(12) | 54.9(6) |
| C18  | 5823(3)  | 2078(3)  | 1634.5(11) | 52.5(6) |
| C27  | 7159(3)  | 2583(2)  | 1345.8(11) | 49.9(6) |
| N2   | 10819(3) | 2185(3)  | 2188.0(14) | 84.2(8) |
| C20  | 5025(3)  | 4093(3)  | 2149.8(11) | 53.7(6) |
| C12  | 7461(3)  | 6050(3)  | 548.5(12)  | 54.9(6) |
| C18A | 2859(3)  | 3921(3)  | 5103.5(12) | 55.3(6) |
| C19A | 2289(3)  | 5069(3)  | 4829.9(12) | 58.4(7) |
| C14A | 3224(3)  | 1561(3)  | 5129.7(12) | 57.1(7) |
| C19  | 4802(3)  | 2841(3)  | 2019.6(12) | 57.9(7) |
| C13A | 5108(3)  | 406(3)   | 3127.5(12) | 58.2(7) |
| C1   | 10576(3) | 2958(3)  | 1827.3(14) | 64.8(8) |
| C13  | 8137(4)  | 6961(3)  | 200.3(13)  | 61.3(7) |
| C8   | 5846(3)  | 5936(3)  | 563.4(13)  | 63.5(7) |
| C23A | -170(3)  | 5133(3)  | 3305.4(13) | 62.7(7) |
| C8A  | 5122(3)  | 2431(3)  | 3642.3(13) | 59.9(7) |
| C10  | 10120(3) | 5895(3)  | 596.6(12)  | 58.1(7) |
| C21A | 891(4)   | 6279(2)  | 4048.5(14) | 66.8(8) |
| C2   | 11671(4) | 4503(3)  | 1141.8(14) | 65.3(8) |

| Atom | <i>x</i> | <i>y</i> | <i>z</i>   | U(eq)    |
|------|----------|----------|------------|----------|
| C14  | 8164(3)  | 1775(3)  | 942.8(13)  | 63.0(7)  |
| C24  | 6591(3)  | 5885(3)  | 2030.1(13) | 63.5(7)  |
| C17A | 3710(4)  | 3871(3)  | 5613.7(14) | 70.6(8)  |
| C5A  | 6646(4)  | 441(4)   | 2899.9(14) | 74.1(9)  |
| C22A | 116(4)   | 6300(3)  | 3560.3(15) | 70.7(8)  |
| C21  | 3967(3)  | 4876(4)  | 2544.6(14) | 72.9(9)  |
| C7   | 4922(4)  | 6826(3)  | 232.3(14)  | 71.3(8)  |
| C17  | 5606(4)  | 768(3)   | 1523.5(14) | 68.6(8)  |
| C5   | 7190(4)  | 7848(3)  | -130.6(14) | 74.0(8)  |
| C6   | 5595(4)  | 7753(3)  | -106.0(14) | 76.6(9)  |
| C15A | 4025(4)  | 1560(3)  | 5612.5(15) | 74.2(9)  |
| C7A  | 6636(3)  | 2456(3)  | 3396.8(14) | 72.7(9)  |
| C6A  | 7400(4)  | 1458(4)  | 3037.6(14) | 78.6(10) |
| C16  | 6628(4)  | 28(3)    | 1156.1(15) | 76.8(9)  |
| C15  | 7906(4)  | 546(3)   | 857.2(14)  | 73.6(9)  |
| C23  | 5552(4)  | 6584(3)  | 2409.7(14) | 76.4(9)  |
| C16A | 4273(4)  | 2743(4)  | 5863.8(15) | 81.8(10) |
| C22  | 4222(4)  | 6095(4)  | 2667.6(15) | 81.4(10) |
| C9   | 1343(8)  | 8823(7)  | 1907(3)    | 140(2)   |
| Cl2  | 1823(19) | 9395(15) | 1352(9)    | 144(7)   |
| C11  | 1820(30) | 7950(30) | 1720(20)   | 140(2)   |

**Table S12.** Anisotropic Displacement Parameters ( $\text{\AA}^2 \times 10^3$ ) for **6c**.

The Anisotropic displacement factor exponent takes the form: -  
 $2\pi^2[h^2a^{*2}U_{11}+2hka^*b^*U_{12}+\dots]$ .

| Atom | U <sub>11</sub> | U <sub>22</sub> | U <sub>33</sub> | U <sub>23</sub> | U <sub>13</sub> | U <sub>12</sub> |
|------|-----------------|-----------------|-----------------|-----------------|-----------------|-----------------|
| Cl1  | 137.1(10)       | 159.0(13)       | 136.1(11)       | -9.9(9)         | 8.9(8)          | -67.2(9)        |
| Cl   | 180(2)          | 264(3)          | 189(2)          | -97(2)          | 71.6(17)        | -122(2)         |
| N11A | 57.6(12)        | 37.7(10)        | 47.8(13)        | -1.2(8)         | -2.3(9)         | -5.9(9)         |
| N11  | 51.4(12)        | 56.3(13)        | 49.7(13)        | -2.4(10)        | 3.3(9)          | -19.5(9)        |
| N1A  | 88.3(17)        | 39.1(12)        | 64.7(16)        | -7.4(10)        | -3.3(12)        | -13.3(11)       |
| N9A  | 82.9(16)        | 47.5(13)        | 54.2(15)        | -4.1(10)        | 0.0(12)         | 4.3(12)         |
| N1   | 55.3(14)        | 75.5(17)        | 71.6(17)        | -7.0(13)        | 9.9(11)         | -23.2(12)       |
| C4A  | 54.5(13)        | 32.1(11)        | 46.4(14)        | 5.4(9)          | -7.6(10)        | -7.1(10)        |
| C25A | 49.4(13)        | 34.8(11)        | 51.3(15)        | -0.7(9)         | 0.5(10)         | -9.4(9)         |
| N9   | 72.2(16)        | 68.1(16)        | 64.6(16)        | -1.1(12)        | 6.9(12)         | -26.8(12)       |
| C26A | 49.8(13)        | 34.6(11)        | 49.6(14)        | -1.2(9)         | -2.6(10)        | -9.8(9)         |
| C27A | 52.1(13)        | 42.7(13)        | 49.5(15)        | -0.2(10)        | -0.3(10)        | -11.0(10)       |

| Atom | U <sub>11</sub> | U <sub>22</sub> | U <sub>33</sub> | U <sub>23</sub> | U <sub>13</sub> | U <sub>12</sub> |
|------|-----------------|-----------------|-----------------|-----------------|-----------------|-----------------|
| N2A  | 89(2)           | 67.2(18)        | 101(2)          | -18.9(15)       | 18.1(16)        | -30.1(14)       |
| C24A | 60.7(15)        | 40.6(13)        | 56.7(17)        | 0.7(11)         | -5.3(12)        | -10.3(11)       |
| C1A  | 61.9(16)        | 44.0(14)        | 67.8(19)        | -4.8(12)        | 0.0(13)         | -19.4(12)       |
| C3A  | 59.2(15)        | 35.4(12)        | 58.8(16)        | -1.6(10)        | -5.8(11)        | -10.3(10)       |
| C25  | 48.2(13)        | 58.9(15)        | 41.8(14)        | -1.8(11)        | -1.9(10)        | -7.5(11)        |
| C26  | 43.1(12)        | 53.5(15)        | 49.1(15)        | -5.8(11)        | 1.0(10)         | -13.2(10)       |
| C12A | 56.4(14)        | 50.0(14)        | 45.2(15)        | 7.4(11)         | -0.8(10)        | -2.6(11)        |
| C4   | 54.7(14)        | 53.6(15)        | 48.4(15)        | -8.5(11)        | 1.9(11)         | -12.7(11)       |
| C10A | 72.8(17)        | 36.1(12)        | 51.3(16)        | -1.8(10)        | -6.7(12)        | -4.8(12)        |
| C2A  | 74.3(19)        | 42.4(14)        | 71(2)           | -3.7(12)        | -12.7(15)       | -20.2(13)       |
| C20A | 56.2(14)        | 39.7(13)        | 61.2(17)        | -2.0(11)        | 1.1(11)         | -11.5(10)       |
| C3   | 49.6(14)        | 59.8(16)        | 55.9(17)        | -5.2(12)        | 2.6(11)         | -12.7(12)       |
| C18  | 51.0(14)        | 63.4(16)        | 47.5(15)        | 8.3(12)         | -11.1(11)       | -20.6(12)       |
| C27  | 48.6(13)        | 53.4(15)        | 49.7(15)        | 1.4(11)         | -4.4(10)        | -13.6(11)       |
| N2   | 69.0(17)        | 96(2)           | 90(2)           | 22.4(17)        | -10.9(14)       | -20.5(15)       |
| C20  | 43.2(13)        | 71.3(18)        | 44.7(15)        | 5.5(12)         | -0.1(10)        | -3.5(12)        |
| C12  | 62.8(16)        | 56.9(15)        | 47.5(16)        | -6.9(12)        | -0.9(11)        | -17.7(12)       |
| C18A | 60.1(15)        | 49.5(15)        | 58.2(17)        | -7.0(12)        | -2.8(12)        | -13.7(12)       |
| C19A | 66.1(16)        | 46.5(14)        | 64.9(18)        | -14.7(12)       | 0.5(13)         | -16.1(12)       |
| C14A | 72.1(17)        | 46.2(14)        | 54.0(17)        | 4.8(11)         | -10.4(13)       | -9.2(12)        |
| C19  | 47.2(14)        | 74.6(19)        | 53.4(17)        | 15.4(13)        | -3.9(11)        | -15.4(13)       |
| C13A | 67.8(17)        | 58.0(16)        | 43.9(16)        | 4.8(12)         | -2.9(12)        | 7.8(13)         |
| C1   | 48.7(15)        | 74(2)           | 74(2)           | -2.0(16)        | -1.4(13)        | -16.3(13)       |
| C13  | 70.7(18)        | 62.4(17)        | 53.3(17)        | -4.4(13)        | -0.1(13)        | -20.0(14)       |
| C8   | 60.7(16)        | 75(2)           | 57.8(18)        | 0.1(14)         | -2.9(13)        | -19.7(14)       |
| C23A | 71.6(18)        | 54.3(16)        | 63.1(19)        | 9.8(13)         | -12.9(13)       | -8.3(13)        |
| C8A  | 59.7(16)        | 59.5(17)        | 61.8(18)        | 0.3(13)         | -4.8(12)        | -12.8(13)       |
| C10  | 56.6(15)        | 68.2(18)        | 51.9(17)        | -9.4(13)        | 11.2(11)        | -23.8(13)       |
| C21A | 92(2)           | 34.3(13)        | 76(2)           | 0.2(13)         | -5.3(16)        | -13.4(13)       |
| C2   | 52.0(16)        | 76(2)           | 70(2)           | -11.5(15)       | 3.3(13)         | -20.2(14)       |
| C14  | 66.3(17)        | 63.3(18)        | 62.0(18)        | -10.0(14)       | 2.5(13)         | -20.2(14)       |
| C24  | 66.2(17)        | 65.6(18)        | 59.0(18)        | -11.1(13)       | 4.5(13)         | -12.9(14)       |
| C17A | 78(2)           | 75(2)           | 62(2)           | -18.3(16)       | -12.0(15)       | -16.3(16)       |
| C5A  | 65.3(19)        | 87(2)           | 63(2)           | 5.2(16)         | 4.4(14)         | 10.6(17)        |
| C22A | 91(2)           | 39.0(14)        | 80(2)           | 8.1(13)         | -4.9(17)        | -4.5(14)        |
| C21  | 56.1(16)        | 93(3)           | 65(2)           | 9.6(17)         | 6.8(13)         | -2.1(16)        |
| C7   | 67.1(18)        | 82(2)           | 67(2)           | 2.8(16)         | -10.3(14)       | -15.8(16)       |
| C17  | 83(2)           | 70(2)           | 61.5(19)        | 8.9(15)         | -9.9(15)        | -37.4(16)       |
| C5   | 91(2)           | 72(2)           | 62(2)           | 4.0(15)         | -1.1(16)        | -26.3(17)       |

| Atom | U <sub>11</sub> | U <sub>22</sub> | U <sub>33</sub> | U <sub>23</sub> | U <sub>13</sub> | U <sub>12</sub> |
|------|-----------------|-----------------|-----------------|-----------------|-----------------|-----------------|
| C6   | 92(2)           | 77(2)           | 63(2)           | 4.7(16)         | -12.1(16)       | -14.6(18)       |
| C15A | 89(2)           | 67(2)           | 67(2)           | 7.7(15)         | -19.0(16)       | -5.2(16)        |
| C7A  | 59.7(17)        | 90(2)           | 71(2)           | 4.2(17)         | -3.5(15)        | -20.1(16)       |
| C6A  | 56.0(17)        | 109(3)          | 67(2)           | 15.8(19)        | 2.5(14)         | -2.4(18)        |
| C16  | 100(2)          | 57.9(18)        | 78(2)           | 0.6(16)         | -16.3(19)       | -25.7(17)       |
| C15  | 80(2)           | 69(2)           | 74(2)           | -17.4(16)       | -3.8(16)        | -13.5(16)       |
| C23  | 83(2)           | 76(2)           | 67(2)           | -18.8(16)       | 7.1(16)         | -2.8(17)        |
| C16A | 93(2)           | 87(3)           | 67(2)           | -4.7(18)        | -26.7(17)       | -5.9(19)        |
| C22  | 77(2)           | 95(3)           | 67(2)           | -14.3(18)       | 10.8(16)        | 2.4(19)         |
| C9   | 160(5)          | 159(5)          | 111(4)          | -29(4)          | -8(3)           | -56(4)          |
| Cl2  | 115(9)          | 122(10)         | 202(15)         | 123(11)         | -61(10)         | -29(7)          |
| C11  | 160(5)          | 159(5)          | 111(4)          | -29(4)          | -8(3)           | -56(4)          |

Table S13. Bond Lengths for 6c.

| Atom | Atom | Length/Å | Atom | Atom | Length/Å |
|------|------|----------|------|------|----------|
| Cl1  | C9   | 1.728(6) | C4   | C3   | 1.379(4) |
| Cl1  | C11  | 1.71(2)  | C20A | C19A | 1.397(4) |
| Cl   | C9   | 1.668(6) | C20A | C21A | 1.407(4) |
| N11A | C4A  | 1.365(3) | C3   | C1   | 1.422(4) |
| N11A | C12A | 1.385(3) | C3   | C2   | 1.424(4) |
| N11A | C10A | 1.423(3) | C18  | C27  | 1.430(3) |
| N11  | C4   | 1.364(3) | C18  | C19  | 1.378(4) |
| N11  | C12  | 1.404(3) | C18  | C17  | 1.438(4) |
| N11  | C10  | 1.431(3) | C27  | C14  | 1.421(4) |
| N1A  | C10A | 1.359(3) | N2   | C1   | 1.154(4) |
| N1A  | C2A  | 1.302(4) | C20  | C19  | 1.391(4) |
| N9A  | C10A | 1.298(3) | C20  | C21  | 1.418(4) |
| N9A  | C13A | 1.390(4) | C12  | C13  | 1.387(4) |
| N1   | C10  | 1.352(4) | C12  | C8   | 1.393(4) |
| N1   | C2   | 1.298(4) | C18A | C19A | 1.389(4) |
| C4A  | C26A | 1.482(3) | C18A | C17A | 1.416(4) |
| C4A  | C3A  | 1.366(3) | C14A | C15A | 1.342(4) |
| C25A | C26A | 1.404(3) | C13A | C5A  | 1.377(4) |
| C25A | C24A | 1.416(3) | C13  | C5   | 1.395(4) |
| C25A | C20A | 1.435(3) | C8   | C7   | 1.387(4) |
| N9   | C13  | 1.389(4) | C23A | C22A | 1.422(4) |
| N9   | C10  | 1.310(4) | C8A  | C7A  | 1.371(4) |
| C26A | C27A | 1.404(3) | C21A | C22A | 1.338(4) |
| C27A | C18A | 1.438(3) | C14  | C15  | 1.354(4) |

| Atom | Atom | Length/Å | Atom | Atom | Length/Å |
|------|------|----------|------|------|----------|
| C27A | C14A | 1.418(3) | C24  | C23  | 1.346(4) |
| N2A  | C1A  | 1.144(3) | C17A | C16A | 1.346(4) |
| C24A | C23A | 1.355(3) | C5A  | C6A  | 1.369(5) |
| C1A  | C3A  | 1.425(4) | C21  | C22  | 1.361(5) |
| C3A  | C2A  | 1.423(4) | C7   | C6   | 1.387(4) |
| C25  | C26  | 1.394(3) | C17  | C16  | 1.343(5) |
| C25  | C20  | 1.425(3) | C5   | C6   | 1.372(5) |
| C25  | C24  | 1.434(4) | C15A | C16A | 1.423(5) |
| C26  | C4   | 1.480(3) | C7A  | C6A  | 1.402(5) |
| C26  | C27  | 1.414(3) | C16  | C15  | 1.407(5) |
| C12A | C13A | 1.403(4) | C23  | C22  | 1.391(5) |
| C12A | C8A  | 1.403(4) | Cl2  | C11  | 1.72(2)  |

Table S14 Bond Angles for 6c.

| Atom | Atom | Atom | Angle/°  | Atom | Atom | Atom | Angle/°  |
|------|------|------|----------|------|------|------|----------|
| C4A  | N11A | C12A | 132.6(2) | C19  | C18  | C17  | 121.8(2) |
| C4A  | N11A | C10A | 121.4(2) | C26  | C27  | C18  | 118.1(2) |
| C12A | N11A | C10A | 105.8(2) | C26  | C27  | C14  | 124.0(2) |
| C4   | N11  | C12  | 133.1(2) | C14  | C27  | C18  | 117.9(2) |
| C4   | N11  | C10  | 121.2(2) | C19  | C20  | C25  | 118.5(2) |
| C12  | N11  | C10  | 105.6(2) | C19  | C20  | C21  | 122.4(3) |
| C2A  | N1A  | C10A | 116.7(2) | C21  | C20  | C25  | 119.1(3) |
| C10A | N9A  | C13A | 105.3(2) | C13  | C12  | N11  | 104.8(2) |
| C2   | N1   | C10  | 116.5(2) | C13  | C12  | C8   | 122.3(3) |
| N11A | C4A  | C26A | 118.6(2) | C8   | C12  | N11  | 132.8(3) |
| N11A | C4A  | C3A  | 116.2(2) | C19A | C18A | C27A | 118.7(2) |
| C3A  | C4A  | C26A | 125.2(2) | C19A | C18A | C17A | 123.0(3) |
| C26A | C25A | C24A | 123.3(2) | C17A | C18A | C27A | 118.3(2) |
| C26A | C25A | C20A | 118.2(2) | C18A | C19A | C20A | 122.8(2) |
| C24A | C25A | C20A | 118.5(2) | C15A | C14A | C27A | 121.7(3) |
| C10  | N9   | C13  | 105.2(2) | C18  | C19  | C20  | 122.6(2) |
| C25A | C26A | C4A  | 118.4(2) | N9A  | C13A | C12A | 111.2(2) |
| C27A | C26A | C4A  | 119.0(2) | C5A  | C13A | N9A  | 128.6(3) |
| C27A | C26A | C25A | 122.4(2) | C5A  | C13A | C12A | 120.2(3) |
| C26A | C27A | C18A | 118.7(2) | N2   | C1   | C3   | 177.3(3) |
| C26A | C27A | C14A | 123.3(2) | N9   | C13  | C5   | 127.3(3) |
| C14A | C27A | C18A | 117.9(2) | C12  | C13  | N9   | 112.3(3) |
| C23A | C24A | C25A | 121.0(2) | C12  | C13  | C5   | 120.4(3) |
| N2A  | C1A  | C3A  | 176.9(3) | C7   | C8   | C12  | 116.6(3) |

| Atom | Atom | Atom | Angle/°  | Atom | Atom | Atom | Angle/°   |
|------|------|------|----------|------|------|------|-----------|
| C4A  | C3A  | C1A  | 120.2(2) | C24A | C23A | C22A | 119.8(3)  |
| C4A  | C3A  | C2A  | 120.2(3) | C7A  | C8A  | C12A | 116.9(3)  |
| C2A  | C3A  | C1A  | 119.5(2) | N1   | C10  | N11  | 121.8(3)  |
| C26  | C25  | C20  | 119.6(2) | N9   | C10  | N11  | 112.0(2)  |
| C26  | C25  | C24  | 123.2(2) | N9   | C10  | N1   | 126.1(3)  |
| C20  | C25  | C24  | 117.3(2) | C22A | C21A | C20A | 121.6(3)  |
| C25  | C26  | C4   | 119.2(2) | N1   | C2   | C3   | 124.5(3)  |
| C25  | C26  | C27  | 121.5(2) | C15  | C14  | C27  | 120.9(3)  |
| C27  | C26  | C4   | 119.1(2) | C23  | C24  | C25  | 121.2(3)  |
| N11A | C12A | C13A | 105.1(2) | C16A | C17A | C18A | 121.7(3)  |
| N11A | C12A | C8A  | 133.4(2) | C6A  | C5A  | C13A | 118.5(3)  |
| C8A  | C12A | C13A | 121.5(3) | C21A | C22A | C23A | 120.7(3)  |
| N11  | C4   | C26  | 121.3(2) | C22  | C21  | C20  | 121.1(3)  |
| N11  | C4   | C3   | 115.8(2) | C6   | C7   | C8   | 121.0(3)  |
| C3   | C4   | C26  | 122.8(2) | C16  | C17  | C18  | 121.1(3)  |
| N1A  | C10A | N11A | 121.2(2) | C6   | C5   | C13  | 117.3(3)  |
| N9A  | C10A | N11A | 112.7(2) | C5   | C6   | C7   | 122.4(3)  |
| N9A  | C10A | N1A  | 126.1(2) | C14A | C15A | C16A | 120.5(3)  |
| N1A  | C2A  | C3A  | 124.0(3) | C8A  | C7A  | C6A  | 121.5(3)  |
| C19A | C20A | C25A | 119.1(2) | C5A  | C6A  | C7A  | 121.4(3)  |
| C19A | C20A | C21A | 122.4(2) | C17  | C16  | C15  | 119.9(3)  |
| C21A | C20A | C25A | 118.4(2) | C14  | C15  | C16  | 121.4(3)  |
| C4   | C3   | C1   | 120.7(2) | C24  | C23  | C22  | 121.4(3)  |
| C4   | C3   | C2   | 120.1(3) | C17A | C16A | C15A | 119.9(3)  |
| C1   | C3   | C2   | 119.2(3) | C21  | C22  | C23  | 119.9(3)  |
| C27  | C18  | C17  | 118.6(3) | Cl   | C9   | Cl1  | 114.3(3)  |
| C19  | C18  | C27  | 119.6(2) | Cl1  | C11  | Cl2  | 110.1(15) |

**Table S15.** Torsion Angles for **6c**.

| A    | B    | C    | D    | Angle/°   | A    | B    | C    | D    | Angle/°   |
|------|------|------|------|-----------|------|------|------|------|-----------|
| N11A | C4A  | C26A | C25A | 90.8(3)   | C10A | N11A | C12A | C8A  | 179.5(3)  |
| N11A | C4A  | C26A | C27A | -85.2(3)  | C10A | N1A  | C2A  | C3A  | 1.1(4)    |
| N11A | C4A  | C3A  | C1A  | 176.5(2)  | C10A | N9A  | C13A | C12A | -1.5(3)   |
| N11A | C4A  | C3A  | C2A  | -1.5(3)   | C10A | N9A  | C13A | C5A  | 177.9(3)  |
| N11A | C12A | C13A | N9A  | 1.6(3)    | C2A  | N1A  | C10A | N11A | -3.7(4)   |
| N11A | C12A | C13A | C5A  | -177.9(2) | C2A  | N1A  | C10A | N9A  | 176.4(3)  |
| N11A | C12A | C8A  | C7A  | 179.5(3)  | C20A | C25A | C26A | C4A  | -174.0(2) |
| N11  | C4   | C3   | C1   | 177.1(2)  | C20A | C25A | C26A | C27A | 1.8(4)    |
| N11  | C4   | C3   | C2   | -0.8(4)   | C20A | C25A | C24A | C23A | -1.7(4)   |

| A    | B    | C    | D    | Angle/°   | A    | B    | C    | D    | Angle/°   |
|------|------|------|------|-----------|------|------|------|------|-----------|
| N11  | C12  | C13  | N9   | 0.3(3)    | C20A | C21A | C22A | C23A | 0.8(5)    |
| N11  | C12  | C13  | C5   | -179.5(2) | C18  | C27  | C14  | C15  | -3.2(4)   |
| N11  | C12  | C8   | C7   | -179.6(3) | C18  | C17  | C16  | C15  | -2.2(5)   |
| N9A  | C13A | C5A  | C6A  | 179.2(3)  | C27  | C26  | C4   | N11  | 112.9(3)  |
| C4A  | N11A | C12A | C13A | 174.7(2)  | C27  | C26  | C4   | C3   | -70.7(3)  |
| C4A  | N11A | C12A | C8A  | -4.8(5)   | C27  | C18  | C19  | C20  | -1.0(4)   |
| C4A  | N11A | C10A | N1A  | 3.8(4)    | C27  | C18  | C17  | C16  | -0.2(4)   |
| C4A  | N11A | C10A | N9A  | -176.2(2) | C27  | C14  | C15  | C16  | 0.9(5)    |
| C4A  | C26A | C27A | C18A | 174.3(2)  | C20  | C25  | C26  | C4   | -176.6(2) |
| C4A  | C26A | C27A | C14A | -3.9(4)   | C20  | C25  | C26  | C27  | -1.2(4)   |
| C4A  | C3A  | C2A  | N1A  | 1.6(4)    | C20  | C25  | C24  | C23  | -1.4(4)   |
| C25A | C26A | C27A | C18A | -1.5(4)   | C20  | C21  | C22  | C23  | -0.9(5)   |
| C25A | C26A | C27A | C14A | -179.7(2) | C12  | N11  | C4   | C26  | -1.6(4)   |
| C25A | C24A | C23A | C22A | 2.1(4)    | C12  | N11  | C4   | C3   | -178.2(3) |
| C25A | C20A | C19A | C18A | -0.2(4)   | C12  | N11  | C10  | N1   | -179.7(2) |
| C25A | C20A | C21A | C22A | -0.4(4)   | C12  | N11  | C10  | N9   | 0.7(3)    |
| N9   | C13  | C5   | C6   | 178.6(3)  | C12  | C13  | C5   | C6   | -1.6(4)   |
| C26A | C4A  | C3A  | C1A  | -5.1(4)   | C12  | C8   | C7   | C6   | 1.6(5)    |
| C26A | C4A  | C3A  | C2A  | 176.9(2)  | C18A | C27A | C14A | C15A | 0.1(4)    |
| C26A | C25A | C24A | C23A | -179.7(2) | C18A | C17A | C16A | C15A | 0.4(5)    |
| C26A | C25A | C20A | C19A | -1.0(4)   | C19A | C20A | C21A | C22A | 179.4(3)  |
| C26A | C25A | C20A | C21A | 178.9(2)  | C19A | C18A | C17A | C16A | -178.8(3) |
| C26A | C27A | C18A | C19A | 0.3(4)    | C14A | C27A | C18A | C19A | 178.6(2)  |
| C26A | C27A | C18A | C17A | -178.5(2) | C14A | C27A | C18A | C17A | -0.2(4)   |
| C26A | C27A | C14A | C15A | 178.3(3)  | C14A | C15A | C16A | C17A | -0.5(6)   |
| C27A | C18A | C19A | C20A | 0.5(4)    | C19  | C18  | C27  | C26  | 1.1(4)    |
| C27A | C18A | C17A | C16A | -0.1(5)   | C19  | C18  | C27  | C14  | -178.7(2) |
| C27A | C14A | C15A | C16A | 0.2(5)    | C19  | C18  | C17  | C16  | -178.6(3) |
| C24A | C25A | C26A | C4A  | 3.9(4)    | C19  | C20  | C21  | C22  | 179.4(3)  |
| C24A | C25A | C26A | C27A | 179.8(2)  | C13A | N9A  | C10A | N11A | 0.9(3)    |
| C24A | C25A | C20A | C19A | -179.0(2) | C13A | N9A  | C10A | N1A  | -179.2(2) |
| C24A | C25A | C20A | C21A | 0.9(4)    | C13A | C12A | C8A  | C7A  | 0.0(4)    |
| C24A | C23A | C22A | C21A | -1.6(5)   | C13A | C5A  | C6A  | C7A  | -0.6(5)   |
| C1A  | C3A  | C2A  | N1A  | -176.4(3) | C1   | C3   | C2   | N1   | -176.5(3) |
| C3A  | C4A  | C26A | C25A | -87.5(3)  | C13  | N9   | C10  | N11  | -0.5(3)   |
| C3A  | C4A  | C26A | C27A | 96.5(3)   | C13  | N9   | C10  | N1   | 179.9(3)  |
| C25  | C26  | C4   | N11  | -71.6(3)  | C13  | C12  | C8   | C7   | -3.1(4)   |
| C25  | C26  | C4   | C3   | 104.9(3)  | C13  | C5   | C6   | C7   | 0.3(5)    |
| C25  | C26  | C27  | C18  | -0.1(4)   | C8   | C12  | C13  | N9   | -177.1(3) |



| A    | B    | C    | D    | Angle/°   | A    | B    | C    | D    | Angle/°   |
|------|------|------|------|-----------|------|------|------|------|-----------|
| C25  | C26  | C27  | C14  | 179.7(2)  | C8   | C12  | C13  | C5   | 3.1(4)    |
| C25  | C20  | C19  | C18  | -0.3(4)   | C8   | C7   | C6   | C5   | -0.3(5)   |
| C25  | C20  | C21  | C22  | -0.5(4)   | C8A  | C12A | C13A | N9A  | -178.8(2) |
| C25  | C24  | C23  | C22  | 0.0(5)    | C8A  | C12A | C13A | C5A  | 1.7(4)    |
| C26  | C25  | C20  | C19  | 1.3(4)    | C8A  | C7A  | C6A  | C5A  | 2.4(5)    |
| C26  | C25  | C20  | C21  | -178.7(2) | C10  | N11  | C4   | C26  | 175.7(2)  |
| C26  | C25  | C24  | C23  | 178.9(3)  | C10  | N11  | C4   | C3   | -1.0(3)   |
| C26  | C4   | C3   | C1   | 0.5(4)    | C10  | N11  | C12  | C13  | -0.5(3)   |
| C26  | C4   | C3   | C2   | -177.4(2) | C10  | N11  | C12  | C8   | 176.4(3)  |
| C26  | C27  | C14  | C15  | 177.0(3)  | C10  | N1   | C2   | C3   | -0.1(4)   |
| C12A | N11A | C4A  | C26A | 5.3(4)    | C10  | N9   | C13  | C12  | 0.1(3)    |
| C12A | N11A | C4A  | C3A  | -176.2(2) | C10  | N9   | C13  | C5   | 179.9(3)  |
| C12A | N11A | C10A | N1A  | -179.9(2) | C21A | C20A | C19A | C18A | 179.9(3)  |
| C12A | N11A | C10A | N9A  | 0.1(3)    | C2   | N1   | C10  | N11  | -1.8(4)   |
| C12A | C13A | C5A  | C6A  | -1.4(4)   | C2   | N1   | C10  | N9   | 177.8(3)  |
| C12A | C8A  | C7A  | C6A  | -2.0(4)   | C24  | C25  | C26  | C4   | 3.1(4)    |
| C4   | N11  | C12  | C13  | 177.0(3)  | C24  | C25  | C26  | C27  | 178.5(2)  |
| C4   | N11  | C12  | C8   | -6.0(5)   | C24  | C25  | C20  | C19  | -178.4(2) |
| C4   | N11  | C10  | N1   | 2.4(4)    | C24  | C25  | C20  | C21  | 1.6(4)    |
| C4   | N11  | C10  | N9   | -177.3(2) | C24  | C23  | C22  | C21  | 1.1(5)    |
| C4   | C26  | C27  | C18  | 175.4(2)  | C17A | C18A | C19A | C20A | 179.3(3)  |
| C4   | C26  | C27  | C14  | -4.8(4)   | C21  | C20  | C19  | C18  | 179.7(3)  |
| C4   | C3   | C2   | N1   | 1.4(5)    | C17  | C18  | C27  | C26  | -177.4(2) |
| C10A | N11A | C4A  | C26A | -179.6(2) | C17  | C18  | C27  | C14  | 2.8(4)    |
| C10A | N11A | C4A  | C3A  | -1.1(3)   | C17  | C18  | C19  | C20  | 177.5(2)  |
| C10A | N11A | C12A | C13A | -1.0(3)   | C17  | C16  | C15  | C14  | 1.9(5)    |

**Table S16.** Hydrogen Atom Coordinates ( $\text{\AA} \times 10^4$ ) and Isotropic Displacement Parameters ( $\text{\AA}^2 \times 10^3$ ) for **6c**.

| Atom | <i>x</i> | <i>y</i> | <i>z</i> | U(eq) |
|------|----------|----------|----------|-------|
| H24A | 221.1    | 3223.77  | 3374.61  | 63    |
| H19A | 2463.08  | 5842.14  | 4990.91  | 70    |
| H14A | 3071.82  | 778.22   | 4973     | 68    |
| H19  | 3928.42  | 2504.2   | 2199.46  | 70    |
| H8   | 5410.77  | 5296.55  | 783.99   | 76    |
| H23A | -732.14  | 5157.16  | 2971.6   | 75    |
| H8A  | 4624.82  | 3079.13  | 3890.31  | 72    |
| H21A | 1052.48  | 7054.45  | 4210.2   | 80    |
| H14  | 9009.68  | 2095.6   | 734.83   | 76    |

| Atom | <i>x</i>  | <i>y</i> | <i>z</i> | U(eq) |
|------|-----------|----------|----------|-------|
| H24  | 7468.34   | 6239.3   | 1865.14  | 76    |
| H17A | 3884.47   | 4638.28  | 5780.18  | 85    |
| H5A  | 7159.41   | -212.6   | 2658.27  | 89    |
| H22A | -239.31   | 7085.42  | 3385.79  | 85    |
| H21  | 3083.22   | 4549.95  | 2722.5   | 88    |
| H7   | 3833.3    | 6799.33  | 237.31   | 86    |
| H17  | 4742.61   | 428.01   | 1709.24  | 82    |
| H5   | 7622.92   | 8478.71  | -358.43  | 89    |
| H6   | 4941.09   | 8332.27  | -324.29  | 92    |
| H15A | 4421.64   | 781.77   | 5784.17  | 89    |
| H7A  | 7167.44   | 3149.83  | 3470.16  | 87    |
| H6A  | 8442.16   | 1488.06  | 2889.71  | 94    |
| H16  | 6490.49   | -826.6   | 1099.41  | 92    |
| H15  | 8589.35   | 33.32    | 595.08   | 88    |
| H23  | 5727.46   | 7412.35  | 2501.68  | 92    |
| H16A | 4822.35   | 2736.43  | 6200.12  | 98    |
| H22  | 3509.67   | 6599.45  | 2923.37  | 98    |
| H9A  | 824.85    | 9695.39  | 1974.83  | 168   |
| H9B  | 2107.12   | 8621.78  | 2200.31  | 168   |
| H11A | 2203.57   | 7245.2   | 1453.81  | 168   |
| H11B | 2522.28   | 7906.73  | 2034.96  | 168   |
| H2   | 12730(40) | 4190(30) | 1255(13) | 72(9) |
| H2A  | -530(30)  | -670(30) | 3811(12) | 65(8) |

Table S17. Atomic Occupancy for 6c.

| Atom | Occupancy | Atom | Occupancy | Atom | Occupancy |
|------|-----------|------|-----------|------|-----------|
| Cl   | 0.9       | C9   | 0.9       | H9A  | 0.9       |
| H9B  | 0.9       | Cl2  | 0.1       | C11  | 0.1       |
| H11A | 0.1       | H11B | 0.1       |      |           |

**Crystal structure determination of 6c.**

**Crystal Data** for C<sub>51</sub>H<sub>30</sub>Cl<sub>2</sub>N<sub>8</sub> (*M* = 825.73 g/mol): triclinic, space group P-1 (no. 2), *a* = 8.5135(4) Å, *b* = 10.4646(5) Å, *c* = 22.9053(12) Å,  $\alpha$  = 88.784(4)°,  $\beta$  = 85.741(4)°,  $\gamma$  = 82.301(4)°, *V* = 2016.53(17) Å<sup>3</sup>, *Z* = 2, *T* = 295(2) K,  $\mu$ (MoK $\alpha$ ) = 0.210 mm<sup>-1</sup>, *D*<sub>calc</sub> = 1.360 g/cm<sup>3</sup>, 20634 reflections measured (7.384° ≤ 2 $\Theta$  ≤ 60.982°), 10876 unique (*R*<sub>int</sub> = 0.0577, *R*<sub>sigma</sub> = 0.0845) which were used in all calculations. The final *R*<sub>1</sub> was 0.0767 (*I* > 2 $\sigma$ (*I*)) and *wR*<sub>2</sub> was 0.2616 (all data).

**Refinement model description**

Number of restraints - 14, number of constraints - unknown.

Details:

1. Fixed Uiso

At 1.2 times of:

All C(H) groups, All C(H,H) groups

2. Restrained distances

C11-Cl1

1.7 with sigma of 0.02

C11-Cl2

1.7 with sigma of 0.02

3. Uiso/Uanis restraints and constraints

Uanis(Cl2)  $\approx$  Ueq, Uanis(C11)  $\approx$  Ueq: with sigma of 0.01 and sigma for terminal atoms of 0.02

Uanis(C11) = Uanis(C9)

4. Others

Fixed Sof: Cl(0.9) C9(0.9) H9A(0.9) H9B(0.9) Cl2(0.1) C11(0.1) H11A(0.1) H11B(0.1)

5.a Secondary CH2 refined with riding coordinates:

C9(H9A,H9B), C11(H11A,H11B)

5.b Aromatic/amide H refined with riding coordinates:

C24A(H24A), C19A(H19A), C14A(H14A), C19(H19), C8(H8), C23A(H23A), C8A(H8A), C21A(H21A), C14(H14), C24(H24), C17A(H17A), C5A(H5A), C22A(H22A), C21(H21), C7(H7), C17(H17), C5(H5), C6(H6), C15A(H15A), C7A(H7A), C6A(H6A), C16(H16), C15(H15), C23(H23), C16A(H16A), C22(H22)
